# Supplementary material for: Genome-wide detection of copy number variations in polled yak using the Illumina BovineHD BeadChip
Source: BMC Genomics. 2019 May 14;20:376. doi: 10.1186/s12864-019-5759-1 (PMC6518677; doi:10.1186/s12864-019-5759-1)
Supplement: Supplementary file 2 — Table S2. Detail information about CNVs after filtering. (XLSX 1227 kb) [file 12864_2019_5759_MOESM2_ESM.xlsx]

## Sheet: Sheet1
Table S2 Detail information about CNVs after filtering
chr:start-end	number of snp	size	state	sample id	start snp	end snp
chr5:102773939-102932410	numsnp=63	length=158,472	state1,cn=0	1	startsnp=BovineHD0500029439	endsnp=BovineHD0500029507
chr12:32054331-32182960	numsnp=16	length=128,630	state1,cn=0	1	startsnp=BovineHD1200009422	endsnp=BovineHD1200027784
chr12:70392108-70618867	numsnp=23	length=226,760	state1,cn=0	1	startsnp=BovineHD1200019356	endsnp=BovineHD1200019396
chr12:74840021-75193156	numsnp=18	length=353,136	state1,cn=0	1	startsnp=BovineHD1200020836	endsnp=BovineHD1200020930
chr13:170016-329928	numsnp=15	length=159,913	state1,cn=0	1	startsnp=BovineHD1300000020	endsnp=BovineHD1300000050
chr15:80090566-80316180	numsnp=40	length=225,615	state1,cn=0	1	startsnp=BovineHD1500023358	endsnp=BovineHD1500023410
chr16:5676289-5789669	numsnp=27	length=113,381	state1,cn=0	1	startsnp=BovineHD1600001604	endsnp=BovineHD1600001649
chr16:8091686-8163296	numsnp=16	length=71,611	state1,cn=0	1	startsnp=BovineHD1600002309	endsnp=BovineHD1600002324
chr29:38711384-38779159	numsnp=12	length=67,776	state1,cn=0	1	startsnp=BovineHD2900011714	endsnp=BovineHD2900011739
chr1:72758347-72931620	numsnp=42	length=173,274	state2,cn=1	1	startsnp=BovineHD0100020841	endsnp=BovineHD0100020881
chr1:147008747-147066830	numsnp=34	length=58,084	state2,cn=1	1	startsnp=BovineHD0100042488	endsnp=ARS-BFGL-NGS-1705
chr1:147337528-147410842	numsnp=24	length=73,315	state2,cn=1	1	startsnp=BovineHD0100042605	endsnp=BovineHD0100042628
chr1:157193589-157273077	numsnp=34	length=79,489	state2,cn=1	1	startsnp=BovineHD0100046640	endsnp=BovineHD0100045991
chr2:24806784-24889494	numsnp=14	length=82,711	state2,cn=1	1	startsnp=BovineHD0200007132	endsnp=BovineHD0200007153
chr2:35213457-35277747	numsnp=15	length=64,291	state2,cn=1	1	startsnp=BovineHD0200010359	endsnp=BovineHD0200010371
chr2:48029798-48138868	numsnp=24	length=109,071	state2,cn=1	1	startsnp=BovineHD0200013919	endsnp=BovineHD0200013942
chr3:78728025-78837660	numsnp=32	length=109,636	state2,cn=1	1	startsnp=BovineHD0300022694	endsnp=BovineHD0300022727
chr3:83491965-83667732	numsnp=44	length=175,768	state2,cn=1	1	startsnp=BovineHD0300023894	endsnp=BovineHD0300023929
chr3:94423069-94515232	numsnp=22	length=92,164	state2,cn=1	1	startsnp=BovineHD0300027207	endsnp=BovineHD0300036315
chr3:118071660-118230562	numsnp=44	length=158,903	state2,cn=1	1	startsnp=BovineHD0300034431	endsnp=BovineHD0300034469
chr3:118619968-118719398	numsnp=42	length=99,431	state2,cn=1	1	startsnp=BovineHD0300034596	endsnp=BovineHD0300034635
chr3:120399995-120457545	numsnp=15	length=57,551	state2,cn=1	1	startsnp=BovineHD0300035213	endsnp=BovineHD0300035227
chr3:120493096-120836801	numsnp=89	length=343,706	state2,cn=1	1	startsnp=BovineHD0300035235	endsnp=BovineHD0300035314
chr3:120883492-121293240	numsnp=132	length=409,749	state2,cn=1	1	startsnp=BovineHD4100002577	endsnp=BovineHD0300035445
chr4:36548119-36644000	numsnp=29	length=95,882	state2,cn=1	1	startsnp=BovineHD0400010245	endsnp=BovineHD0400010270
chr4:72375370-72508028	numsnp=28	length=132,659	state2,cn=1	1	startsnp=BovineHD0400020051	endsnp=BovineHD0400020078
chr4:88782951-88837310	numsnp=16	length=54,360	state2,cn=1	1	startsnp=Hapmap55855-rs29017652	endsnp=BovineHD0400024598
chr5:15705417-15766061	numsnp=15	length=60,645	state2,cn=1	1	startsnp=BovineHD0500004636	endsnp=BovineHD0500004649
chr5:40780471-40944756	numsnp=46	length=164,286	state2,cn=1	1	startsnp=BovineHD0500011670	endsnp=BovineHD0500011711
chr5:51392175-51515066	numsnp=22	length=122,892	state2,cn=1	1	startsnp=Hapmap34504-BES10_Contig662_1293	endsnp=BovineHD0500014818
chr5:76653989-76758621	numsnp=16	length=104,633	state2,cn=1	1	startsnp=BovineHD0500021851	endsnp=BovineHD0500021862
chr5:99940785-100083932	numsnp=38	length=143,148	state2,cn=1	1	startsnp=BovineHD0500028600	endsnp=BovineHD0500028642
chr5:119743523-119989587	numsnp=60	length=246,065	state2,cn=1	1	startsnp=BovineHD0500034983	endsnp=BovineHD0500035043
chr6:38837159-39023195	numsnp=37	length=186,037	state2,cn=1	1	startsnp=BovineHD4100004577	endsnp=BovineHD4100004588
chr6:56310814-56382133	numsnp=22	length=71,320	state2,cn=1	1	startsnp=BovineHD0600015404	endsnp=BovineHD0600015423
chr6:72530163-72589945	numsnp=20	length=59,783	state2,cn=1	1	startsnp=BovineHD0600020144	endsnp=BovineHD0600020161
chr6:106922320-107057253	numsnp=53	length=134,934	state2,cn=1	1	startsnp=BovineHD0600030056	endsnp=BovineHD0600030112
chr6:107212183-107291500	numsnp=21	length=79,318	state2,cn=1	1	startsnp=BovineHD0600030165	endsnp=BovineHD0600030185
chr6:109019350-109844160	numsnp=169	length=824,811	state2,cn=1	1	startsnp=BovineHD0600030730	endsnp=BovineHD0600030892
chr7:11136869-11402583	numsnp=41	length=265,715	state2,cn=1	1	startsnp=BovineHD0700032940	endsnp=BovineHD0700003017
chr7:43234644-43330896	numsnp=24	length=96,253	state2,cn=1	1	startsnp=BovineHD0700012544	endsnp=BovineHD0700012567
chr7:53562468-53641290	numsnp=49	length=78,823	state2,cn=1	1	startsnp=BovineHD0700015412	endsnp=BovineHD0700015465
chr7:53900821-53952520	numsnp=25	length=51,700	state2,cn=1	1	startsnp=BovineHD0700015547	endsnp=BovineHD0700015573
chr7:109890025-110014198	numsnp=17	length=124,174	state2,cn=1	1	startsnp=ARS-BFGL-NGS-81660	endsnp=BovineHD0700032114
chr8:27048244-27159357	numsnp=24	length=111,114	state2,cn=1	1	startsnp=BovineHD0800008154	endsnp=BovineHD0800008176
chr9:5279596-5720805	numsnp=87	length=441,210	state2,cn=1	1	startsnp=BovineHD0900001102	endsnp=BovineHD0900001179
chr10:22900753-23109707	numsnp=21	length=208,955	state2,cn=1	1	startsnp=BovineHD1000007480	endsnp=BovineHD1000007599
chr10:70750438-70878349	numsnp=27	length=127,912	state2,cn=1	1	startsnp=BovineHD1000020291	endsnp=BovineHD1000020317
chr11:15029477-15140536	numsnp=21	length=111,060	state2,cn=1	1	startsnp=BTB-00461989	endsnp=BovineHD1100004842
chr11:58267632-58419387	numsnp=35	length=151,756	state2,cn=1	1	startsnp=BovineHD1100016769	endsnp=ARS-BFGL-BAC-11747
chr11:103644879-104094452	numsnp=116	length=449,574	state2,cn=1	1	startsnp=BovineHD1100030159	endsnp=BovineHD1100030258
chr11:104318222-104679644	numsnp=99	length=361,423	state2,cn=1	1	startsnp=BovineHD1100030342	endsnp=ARS-BFGL-NGS-26791
chr11:105638713-106459392	numsnp=207	length=820,680	state2,cn=1	1	startsnp=BovineHD1100030682	endsnp=BovineHD1100030884
chr11:106586225-106713818	numsnp=62	length=127,594	state2,cn=1	1	startsnp=BovineHD1100030959	endsnp=BovineHD1100031015
chr12:89237650-89360668	numsnp=48	length=123,019	state2,cn=1	1	startsnp=BovineHD1200026126	endsnp=BovineHD1200026173
chr12:90117869-90281598	numsnp=58	length=163,730	state2,cn=1	1	startsnp=BovineHD1200026405	endsnp=BovineHD1200026459
chr12:90398239-90789716	numsnp=108	length=391,478	state2,cn=1	1	startsnp=BovineHD1200026505	endsnp=BovineHD1200026599
chr13:20965563-21042957	numsnp=39	length=77,395	state2,cn=1	1	startsnp=BovineHD1300006064	endsnp=BovineHD1300024548
chr13:23685721-23751564	numsnp=19	length=65,844	state2,cn=1	1	startsnp=BovineHD1300006839	endsnp=BovineHD1300006857
chr14:1585385-1873047	numsnp=57	length=287,663	state2,cn=1	1	startsnp=BovineHD1400000187	endsnp=BovineHD1400000244
chr14:2015554-2230450	numsnp=49	length=214,897	state2,cn=1	1	startsnp=BovineHD1400000274	endsnp=BovineHD4100010528
chr14:2790501-2902668	numsnp=19	length=112,168	state2,cn=1	1	startsnp=BovineHD4100010557	endsnp=BovineHD1400000469
chr14:33246785-33303060	numsnp=21	length=56,276	state2,cn=1	1	startsnp=BovineHD1400009529	endsnp=BovineHD1400009549
chr14:44055073-44126252	numsnp=27	length=71,180	state2,cn=1	1	startsnp=BovineHD1400012468	endsnp=Hapmap43697-BTA-82657
chr14:62627737-62689223	numsnp=22	length=61,487	state2,cn=1	1	startsnp=BovineHD1400017419	endsnp=BovineHD1400017438
chr14:66926389-67489095	numsnp=134	length=562,707	state2,cn=1	1	startsnp=BovineHD1400018715	endsnp=BovineHD1400018846
chr14:71799582-71928766	numsnp=36	length=129,185	state2,cn=1	1	startsnp=BovineHD1400020118	endsnp=BovineHD1400020157
chr14:83547949-83607890	numsnp=27	length=59,942	state2,cn=1	1	startsnp=BovineHD1400023602	endsnp=BovineHD1400023627
chr15:47968279-48069753	numsnp=17	length=101,475	state2,cn=1	1	startsnp=BovineHD1500013761	endsnp=BovineHD1500013785
chr15:50416349-50486846	numsnp=14	length=70,498	state2,cn=1	1	startsnp=BovineHD1500014540	endsnp=BovineHD1500014556
chr15:84973939-85143271	numsnp=42	length=169,333	state2,cn=1	1	startsnp=BovineHD1500024919	endsnp=BovineHD4100012261
chr16:8419721-8486467	numsnp=10	length=66,747	state2,cn=1	1	startsnp=BovineHD1600002379	endsnp=BTA-88251-no-rs
chr16:27055885-27154383	numsnp=33	length=98,499	state2,cn=1	1	startsnp=BovineHD1600007484	endsnp=BovineHD1600007515
chr16:38371856-38450491	numsnp=24	length=78,636	state2,cn=1	1	startsnp=BovineHD1600011020	endsnp=BovineHD1600011040
chr16:70814352-70924028	numsnp=24	length=109,677	state2,cn=1	1	startsnp=BovineHD1600020126	endsnp=BovineHD1600020149
chr16:71083442-71180683	numsnp=26	length=97,242	state2,cn=1	1	startsnp=BovineHD1600020182	endsnp=BovineHD1600020209
chr17:73354100-73516198	numsnp=49	length=162,099	state2,cn=1	1	startsnp=BovineHD1700021435	endsnp=BovineHD1700021477
chr17:73569170-73858134	numsnp=96	length=288,965	state2,cn=1	1	startsnp=BovineHD1700021492	endsnp=BovineHD1700021585
chr17:74794960-75148791	numsnp=63	length=353,832	state2,cn=1	1	startsnp=BovineHD1700021845	endsnp=BovineHD1700022147
chr18:21665648-21805397	numsnp=30	length=139,750	state2,cn=1	1	startsnp=BovineHD1800006681	endsnp=BovineHD1800006706
chr20:2768949-2896657	numsnp=16	length=127,709	state2,cn=1	1	startsnp=BovineHD2000000977	endsnp=BovineHD2000000991
chr20:8475414-8757679	numsnp=60	length=282,266	state2,cn=1	1	startsnp=BTB-00771346	endsnp=Hapmap25538-BTA-134885
chr20:71114595-71571246	numsnp=127	length=456,652	state2,cn=1	1	startsnp=BovineHD2000020801	endsnp=BovineHD2000020917
chr21:7732176-7856529	numsnp=31	length=124,354	state2,cn=1	1	startsnp=BovineHD2100001665	endsnp=BovineHD2100001693
chr21:70224970-70449176	numsnp=82	length=224,207	state2,cn=1	1	startsnp=BovineHD2100020521	endsnp=BovineHD2100020597
chr21:70701216-70833173	numsnp=41	length=131,958	state2,cn=1	1	startsnp=BovineHD2100020703	endsnp=BovineHD4100015392
chr21:71040644-71196532	numsnp=30	length=155,889	state2,cn=1	1	startsnp=BovineHD2100020773	endsnp=BovineHD2100020801
chr22:59979559-60220816	numsnp=79	length=241,258	state2,cn=1	1	startsnp=BovineHD2200017404	endsnp=BovineHD2200017476
chr22:60459451-60552404	numsnp=32	length=92,954	state2,cn=1	1	startsnp=ARS-BFGL-NGS-41433	endsnp=BovineHD4100015874
chr22:60911345-61005174	numsnp=31	length=93,830	state2,cn=1	1	startsnp=BovineHD2200017742	endsnp=BovineHD2200017767
chr22:61099118-61199665	numsnp=38	length=100,548	state2,cn=1	1	startsnp=Hapmap52284-rs29018845	endsnp=ARS-BFGL-NGS-105794
chr23:2908191-3182321	numsnp=80	length=274,131	state2,cn=1	1	startsnp=BovineHD2300000565	endsnp=BovineHD2300000642
chr25:271849-668542	numsnp=103	length=396,694	state2,cn=1	1	startsnp=BovineHD2500000048	endsnp=BovineHD4100016796
chr25:767659-1004903	numsnp=46	length=237,245	state2,cn=1	1	startsnp=BovineHD2500000181	endsnp=BovineHD2500000219
chr25:1040952-1209143	numsnp=66	length=168,192	state2,cn=1	1	startsnp=BovineHD2500000227	endsnp=BovineHD2500000272
chr25:39733401-39807389	numsnp=29	length=73,989	state2,cn=1	1	startsnp=BovineHD2500011086	endsnp=BovineHD2500011108
chr25:41250992-41374004	numsnp=33	length=123,013	state2,cn=1	1	startsnp=BovineHD4100017553	endsnp=BovineHD4100017560
chr25:41596286-41850541	numsnp=77	length=254,256	state2,cn=1	1	startsnp=ARS-BFGL-NGS-30598	endsnp=BovineHD2500011773
chr25:41953370-42740703	numsnp=196	length=787,334	state2,cn=1	1	startsnp=BovineHD4100017582	endsnp=BovineHD2500012250
chr26:49537890-49632062	numsnp=19	length=94,173	state2,cn=1	1	startsnp=BovineHD2600014273	endsnp=BovineHD2600014286
chr26:50816998-51305646	numsnp=125	length=488,649	state2,cn=1	1	startsnp=BovineHD2600014694	endsnp=BovineHD2600014814
chr26:51460945-51680135	numsnp=76	length=219,191	state2,cn=1	1	startsnp=ARS-BFGL-NGS-101725	endsnp=ARS-BFGL-NGS-17431
chr29:48214437-48276737	numsnp=16	length=62,301	state2,cn=1	1	startsnp=BovineHD2900014239	endsnp=BovineHD2900014254
chr29:49377731-49478288	numsnp=17	length=100,558	state2,cn=1	1	startsnp=BovineHD2900014555	endsnp=ARS-BFGL-NGS-89746
chr29:49997333-50325501	numsnp=63	length=328,169	state2,cn=1	1	startsnp=BovineHD2900014664	endsnp=BovineHD2900014722
chr29:50935519-51174708	numsnp=52	length=239,190	state2,cn=1	1	startsnp=BovineHD4100019181	endsnp=BovineHD2900014907
chr4:106031736-106084575	numsnp=15	length=52,840	state5,cn=3	1	startsnp=BovineHD0400029962	endsnp=BovineHD0400029984
chr5:5101-189013	numsnp=33	length=183,913	state5,cn=3	1	startsnp=BovineHD0500000001	endsnp=BovineHD0500000044
chr10:23125923-23654109	numsnp=30	length=528,187	state5,cn=3	1	startsnp=BovineHD1000007603	endsnp=BovineHD1000007768
chr12:70620665-70816749	numsnp=15	length=196,085	state5,cn=3	1	startsnp=BovineHD1200019397	endsnp=BovineHD1200019442
chr15:79785494-79858131	numsnp=19	length=72,638	state5,cn=3	1	startsnp=ARS-BFGL-NGS-69079	endsnp=BovineHD1500025314
chr15:79889933-80069939	numsnp=50	length=180,007	state5,cn=3	1	startsnp=BovineHD1500023302	endsnp=BTB-00620646
chr29:38567737-38710004	numsnp=27	length=142,268	state5,cn=3	1	startsnp=BovineHD2900011663	endsnp=BovineHD2900011713
chr6:6502610-6902973	numsnp=78	length=400,364	state6,cn=4	1	startsnp=BovineHD0600001420	endsnp=BovineHD0600001493
chr1:93730576-93819471	numsnp=10	length=88,896	state1,cn=0	2	startsnp=BovineHD0100047110	endsnp=BovineHD0100026605
chr12:32054331-32182960	numsnp=16	length=128,630	state1,cn=0	2	startsnp=BovineHD1200009422	endsnp=BovineHD1200027784
chr12:70392108-70618867	numsnp=23	length=226,760	state1,cn=0	2	startsnp=BovineHD1200019356	endsnp=BovineHD1200019396
chr12:74840021-75193156	numsnp=18	length=353,136	state1,cn=0	2	startsnp=BovineHD1200020836	endsnp=BovineHD1200020930
chr15:80176347-80316180	numsnp=34	length=139,834	state1,cn=0	2	startsnp=BovineHD1500026018	endsnp=BovineHD1500023410
chr16:5676289-5789669	numsnp=27	length=113,381	state1,cn=0	2	startsnp=BovineHD1600001604	endsnp=BovineHD1600001649
chr16:8414004-8486467	numsnp=12	length=72,464	state1,cn=0	2	startsnp=BTA-26788-no-rs	endsnp=BTA-88251-no-rs
chr1:20033381-20093504	numsnp=23	length=60,124	state2,cn=1	2	startsnp=BovineHD0100005949	endsnp=BovineHD0100005969
chr1:20670704-20792484	numsnp=43	length=121,781	state2,cn=1	2	startsnp=BovineHD0100006120	endsnp=BovineHD0100006158
chr1:34985622-35247683	numsnp=84	length=262,062	state2,cn=1	2	startsnp=BovineHD0100010027	endsnp=BovineHD0100010117
chr1:37808819-37945685	numsnp=67	length=136,867	state2,cn=1	2	startsnp=BovineHD0100010876	endsnp=BovineHD0100010943
chr1:60022354-60260551	numsnp=69	length=238,198	state2,cn=1	2	startsnp=BovineHD4100000336	endsnp=BovineHD0100017031
chr1:66217192-66494267	numsnp=73	length=277,076	state2,cn=1	2	startsnp=BovineHD0100018681	endsnp=BovineHD0100018748
chr1:72115021-72387471	numsnp=42	length=272,451	state2,cn=1	2	startsnp=BovineHD0100020680	endsnp=BovineHD0100020714
chr1:72758347-72931620	numsnp=42	length=173,274	state2,cn=1	2	startsnp=BovineHD0100020841	endsnp=BovineHD0100020881
chr1:76601238-76755599	numsnp=62	length=154,362	state2,cn=1	2	startsnp=BovineHD0100022072	endsnp=BovineHD0100022133
chr1:84626206-84834481	numsnp=47	length=208,276	state2,cn=1	2	startsnp=BovineHD0100024242	endsnp=BovineHD0100024286
chr1:127507201-127687035	numsnp=40	length=179,835	state2,cn=1	2	startsnp=BovineHD0100036037	endsnp=BovineHD0100036068
chr1:131409580-131495551	numsnp=29	length=85,972	state2,cn=1	2	startsnp=BovineHD0100037357	endsnp=BovineHD0100037383
chr1:133527757-133714830	numsnp=49	length=187,074	state2,cn=1	2	startsnp=BovineHD0100038032	endsnp=BovineHD0100038074
chr1:147000239-147066830	numsnp=41	length=66,592	state2,cn=1	2	startsnp=BovineHD0100042481	endsnp=ARS-BFGL-NGS-1705
chr1:147294071-147434939	numsnp=63	length=140,869	state2,cn=1	2	startsnp=BovineHD0100042578	endsnp=BovineHD0100042641
chr1:157193589-157273077	numsnp=34	length=79,489	state2,cn=1	2	startsnp=BovineHD0100046640	endsnp=BovineHD0100045991
chr2:24714894-24938077	numsnp=47	length=223,184	state2,cn=1	2	startsnp=BovineHD0200007107	endsnp=BovineHD0200007177
chr2:31238054-31550275	numsnp=115	length=312,222	state2,cn=1	2	startsnp=BovineHD0200009241	endsnp=BovineHD0200009345
chr2:35193001-35277747	numsnp=19	length=84,747	state2,cn=1	2	startsnp=BovineHD0200010355	endsnp=BovineHD0200010371
chr2:36797285-37156818	numsnp=80	length=359,534	state2,cn=1	2	startsnp=BovineHD0200010794	endsnp=ARS-BFGL-BAC-30703
chr2:47817474-48448951	numsnp=148	length=631,478	state2,cn=1	2	startsnp=BovineHD0200013874	endsnp=BovineHD0200014012
chr2:53934492-54192349	numsnp=57	length=257,858	state2,cn=1	2	startsnp=BovineHD0200015365	endsnp=BovineHD0200015417
chr2:61708027-61787820	numsnp=40	length=79,794	state2,cn=1	2	startsnp=BovineHD0200017729	endsnp=BovineHD0200017770
chr2:91838324-92154830	numsnp=77	length=316,507	state2,cn=1	2	startsnp=BTA-48355-no-rs	endsnp=BovineHD0200026167
chr2:95146221-95275445	numsnp=46	length=129,225	state2,cn=1	2	startsnp=BovineHD0200027342	endsnp=BovineHD0200027387
chr2:101860421-102126882	numsnp=72	length=266,462	state2,cn=1	2	startsnp=BovineHD0200029238	endsnp=BovineHD0200029330
chr3:604022-787371	numsnp=45	length=183,350	state2,cn=1	2	startsnp=BovineHD0300000127	endsnp=ARS-BFGL-NGS-67047
chr3:15134238-15320333	numsnp=63	length=186,096	state2,cn=1	2	startsnp=BovineHD0300004928	endsnp=BovineHD0300004992
chr3:29045330-29111048	numsnp=18	length=65,719	state2,cn=1	2	startsnp=BovineHD0300009190	endsnp=BovineHD0300009207
chr3:43376774-43537606	numsnp=67	length=160,833	state2,cn=1	2	startsnp=BovineHD0300013191	endsnp=BovineHD0300013262
chr3:51239709-51399357	numsnp=44	length=159,649	state2,cn=1	2	startsnp=BovineHD0300015506	endsnp=INRA-611
chr3:66974872-67338055	numsnp=87	length=363,184	state2,cn=1	2	startsnp=BovineHD0300019830	endsnp=BovineHD4100002188
chr3:78728025-78948399	numsnp=68	length=220,375	state2,cn=1	2	startsnp=BovineHD0300022694	endsnp=BovineHD0300022766
chr3:79670682-79765949	numsnp=32	length=95,268	state2,cn=1	2	startsnp=BovineHD0300022959	endsnp=BovineHD0300022989
chr3:83491965-83663765	numsnp=43	length=171,801	state2,cn=1	2	startsnp=BovineHD0300023894	endsnp=BovineHD0300023928
chr3:94416488-94515232	numsnp=24	length=98,745	state2,cn=1	2	startsnp=BovineHD0300027205	endsnp=BovineHD0300036315
chr3:95993259-96344663	numsnp=77	length=351,405	state2,cn=1	2	startsnp=BovineHD0300027548	endsnp=BovineHD0300027620
chr3:98358893-98552988	numsnp=77	length=194,096	state2,cn=1	2	startsnp=BovineHD0300028257	endsnp=INRA-437
chr3:110901226-111060829	numsnp=44	length=159,604	state2,cn=1	2	startsnp=BovineHD0300031907	endsnp=BovineHD0300031950
chr3:118071660-118230562	numsnp=44	length=158,903	state2,cn=1	2	startsnp=BovineHD0300034431	endsnp=BovineHD0300034469
chr3:120556310-120836801	numsnp=72	length=280,492	state2,cn=1	2	startsnp=BovineHD0300035251	endsnp=BovineHD0300035314
chr3:120986297-121293240	numsnp=97	length=306,944	state2,cn=1	2	startsnp=BovineHD0300035358	endsnp=BovineHD0300035445
chr4:5683973-5867735	numsnp=34	length=183,763	state2,cn=1	2	startsnp=BovineHD0400001617	endsnp=BovineHD0400001662
chr4:25770399-25913130	numsnp=38	length=142,732	state2,cn=1	2	startsnp=BovineHD0400007524	endsnp=Hapmap50554-BTA-107048
chr4:32193831-32320697	numsnp=29	length=126,867	state2,cn=1	2	startsnp=BovineHD0400009194	endsnp=BovineHD0400009220
chr4:43566513-43892016	numsnp=56	length=325,504	state2,cn=1	2	startsnp=BovineHD4100002817	endsnp=BovineHD0400011995
chr4:48672797-48906767	numsnp=50	length=233,971	state2,cn=1	2	startsnp=BovineHD0400013379	endsnp=BovineHD0400013426
chr4:51318774-51371784	numsnp=12	length=53,011	state2,cn=1	2	startsnp=BovineHD0400014199	endsnp=BovineHD0400014207
chr4:63859455-64032945	numsnp=41	length=173,491	state2,cn=1	2	startsnp=BovineHD0400017487	endsnp=BovineHD0400017527
chr4:68777243-69024096	numsnp=44	length=246,854	state2,cn=1	2	startsnp=BovineHD0400018912	endsnp=BovineHD0400018976
chr4:72375370-72513244	numsnp=29	length=137,875	state2,cn=1	2	startsnp=BovineHD0400020051	endsnp=BovineHD0400020079
chr4:78704761-78808735	numsnp=39	length=103,975	state2,cn=1	2	startsnp=BovineHD0400021820	endsnp=BovineHD0400021855
chr4:83533963-83757800	numsnp=61	length=223,838	state2,cn=1	2	startsnp=BovineHD0400023152	endsnp=BovineHD0400023207
chr4:88782951-88837310	numsnp=16	length=54,360	state2,cn=1	2	startsnp=Hapmap55855-rs29017652	endsnp=BovineHD0400024598
chr4:89879613-90035217	numsnp=50	length=155,605	state2,cn=1	2	startsnp=BTA-119205-no-rs	endsnp=BovineHD0400035513
chr4:119331842-119483242	numsnp=46	length=151,401	state2,cn=1	2	startsnp=BovineHD0400034956	endsnp=BovineHD0400034998
chr5:9475871-9572611	numsnp=22	length=96,741	state2,cn=1	2	startsnp=BovineHD0500002695	endsnp=BovineHD0500002721
chr5:15699275-15766061	numsnp=18	length=66,787	state2,cn=1	2	startsnp=BovineHD0500004633	endsnp=BovineHD0500004649
chr5:20512172-20693242	numsnp=56	length=181,071	state2,cn=1	2	startsnp=BTA-06872-rs29021228	endsnp=BovineHD0500005982
chr5:40780471-40951191	numsnp=47	length=170,721	state2,cn=1	2	startsnp=BovineHD0500011670	endsnp=BovineHD0500011712
chr5:41601867-41799777	numsnp=51	length=197,911	state2,cn=1	2	startsnp=Hapmap38299-BTA-26131	endsnp=BTA-26132-no-rs
chr5:42014000-42154122	numsnp=32	length=140,123	state2,cn=1	2	startsnp=BovineHD0500012003	endsnp=BovineHD0500012038
chr5:43417275-43490630	numsnp=19	length=73,356	state2,cn=1	2	startsnp=BTB-01477536	endsnp=BovineHD4100003632
chr5:51265925-51515066	numsnp=64	length=249,142	state2,cn=1	2	startsnp=BovineHD0500014753	endsnp=BovineHD0500014818
chr5:76539895-76758621	numsnp=28	length=218,727	state2,cn=1	2	startsnp=BovineHD0500021841	endsnp=BovineHD0500021862
chr5:79225281-79343973	numsnp=35	length=118,693	state2,cn=1	2	startsnp=BovineHD0500022475	endsnp=BovineHD0500022506
chr5:99917490-100129380	numsnp=66	length=211,891	state2,cn=1	2	startsnp=BovineHD0500028585	endsnp=BovineHD0500028662
chr5:102778981-102954266	numsnp=64	length=175,286	state2,cn=1	2	startsnp=BovineHD0500029441	endsnp=Hapmap40294-BTA-89295
chr5:119408760-119989587	numsnp=169	length=580,828	state2,cn=1	2	startsnp=ARS-BFGL-NGS-25107	endsnp=BovineHD0500035043
chr5:120373360-120577036	numsnp=75	length=203,677	state2,cn=1	2	startsnp=BovineHD0500035134	endsnp=BovineHD0500035210
chr6:20088021-20297397	numsnp=101	length=209,377	state2,cn=1	2	startsnp=BovineHD0600005514	endsnp=BTB-01785636
chr6:27546505-27656754	numsnp=36	length=110,250	state2,cn=1	2	startsnp=BovineHD0600007608	endsnp=BovineHD0600007645
chr6:68891130-68961525	numsnp=22	length=70,396	state2,cn=1	2	startsnp=BovineHD0600019016	endsnp=BovineHD0600019037
chr6:72540759-72782236	numsnp=74	length=241,478	state2,cn=1	2	startsnp=BovineHD0600020146	endsnp=BovineHD0600020215
chr6:85041321-85205890	numsnp=48	length=164,570	state2,cn=1	2	startsnp=BovineHD0600023390	endsnp=BovineHD0600023439
chr6:89935963-90132197	numsnp=39	length=196,235	state2,cn=1	2	startsnp=BovineHD0600024652	endsnp=BovineHD0600024689
chr6:107031238-107295187	numsnp=86	length=263,950	state2,cn=1	2	startsnp=BovineHD0600030100	endsnp=BovineHD0600030186
chr6:108223493-108514208	numsnp=80	length=290,716	state2,cn=1	2	startsnp=BovineHD0600030493	endsnp=BovineHD0600030569
chr6:109019350-109844160	numsnp=169	length=824,811	state2,cn=1	2	startsnp=BovineHD0600030730	endsnp=BovineHD0600030892
chr6:118916646-119035273	numsnp=40	length=118,628	state2,cn=1	2	startsnp=BovineHD0600034021	endsnp=BovineHD0600034056
chr7:9873696-10087455	numsnp=15	length=213,760	state2,cn=1	2	startsnp=BovineHD0700002587	endsnp=BovineHD0700033518
chr7:10117929-10233955	numsnp=20	length=116,027	state2,cn=1	2	startsnp=BovineHD0700002653	endsnp=BovineHD0700002707
chr7:24094310-24286099	numsnp=55	length=191,790	state2,cn=1	2	startsnp=BovineHD0700006601	endsnp=BovineHD0700006654
chr7:33128807-33293487	numsnp=38	length=164,681	state2,cn=1	2	startsnp=BovineHD0700009495	endsnp=BovineHD0700009532
chr7:39055287-39129491	numsnp=28	length=74,205	state2,cn=1	2	startsnp=BovineHD0700011327	endsnp=BovineHD0700011351
chr7:47757812-47930150	numsnp=48	length=172,339	state2,cn=1	2	startsnp=BovineHD0700013812	endsnp=BovineHD0700013858
chr7:53536229-53744017	numsnp=88	length=207,789	state2,cn=1	2	startsnp=BovineHD0700015401	endsnp=BovineHD0700015488
chr7:53900821-53952520	numsnp=25	length=51,700	state2,cn=1	2	startsnp=BovineHD0700015547	endsnp=BovineHD0700015573
chr7:96254960-96422037	numsnp=54	length=167,078	state2,cn=1	2	startsnp=Hapmap46388-BTA-93108	endsnp=BovineHD0700028094
chr7:104539246-104678614	numsnp=34	length=139,369	state2,cn=1	2	startsnp=BovineHD4100006381	endsnp=BovineHD0700030577
chr7:109853214-110014198	numsnp=26	length=160,985	state2,cn=1	2	startsnp=BovineHD0700034063	endsnp=BovineHD0700032114
chr7:110713154-110771673	numsnp=27	length=58,520	state2,cn=1	2	startsnp=BovineHD0700032289	endsnp=BovineHD0700032312
chr8:135066-269322	numsnp=31	length=134,257	state2,cn=1	2	startsnp=BovineHD0800000020	endsnp=BovineHD0800000050
chr8:24943413-25071175	numsnp=40	length=127,763	state2,cn=1	2	startsnp=BovineHD0800007541	endsnp=BovineHD0800007577
chr8:26955095-27159357	numsnp=37	length=204,263	state2,cn=1	2	startsnp=BovineHD0800008141	endsnp=BovineHD0800008176
chr8:41479170-41544668	numsnp=25	length=65,499	state2,cn=1	2	startsnp=BovineHD0800012347	endsnp=BovineHD0800012370
chr8:53467071-53599895	numsnp=26	length=132,825	state2,cn=1	2	startsnp=BovineHD0800016068	endsnp=BovineHD0800016096
chr8:61634559-61848642	numsnp=60	length=214,084	state2,cn=1	2	startsnp=BovineHD0800018424	endsnp=BovineHD0800018481
chr8:72420836-72523721	numsnp=32	length=102,886	state2,cn=1	2	startsnp=BovineHD0800021768	endsnp=BovineHD0800021798
chr9:30222172-30286871	numsnp=26	length=64,700	state2,cn=1	2	startsnp=BovineHD0900008192	endsnp=BovineHD0900008215
chr9:31246546-31381170	numsnp=33	length=134,625	state2,cn=1	2	startsnp=BovineHD0900008501	endsnp=BovineHD0900008531
chr9:36574394-36679156	numsnp=57	length=104,763	state2,cn=1	2	startsnp=BovineHD0900010062	endsnp=BovineHD0900010120
chr9:40566887-40631976	numsnp=20	length=65,090	state2,cn=1	2	startsnp=BovineHD0900011243	endsnp=BovineHD0900011259
chr9:49879481-50021937	numsnp=42	length=142,457	state2,cn=1	2	startsnp=BovineHD0900013758	endsnp=BovineHD0900013797
chr9:50916350-51080568	numsnp=43	length=164,219	state2,cn=1	2	startsnp=BovineHD0900014035	endsnp=BovineHD0900014074
chr9:64762696-64848827	numsnp=15	length=86,132	state2,cn=1	2	startsnp=BovineHD0900017778	endsnp=BovineHD0900017793
chr9:70535316-70662914	numsnp=56	length=127,599	state2,cn=1	2	startsnp=BovineHD0900019518	endsnp=BovineHD0900019571
chr9:79579670-79816568	numsnp=58	length=236,899	state2,cn=1	2	startsnp=BovineHD0900022099	endsnp=BovineHD0900022158
chr10:11460618-11552955	numsnp=44	length=92,338	state2,cn=1	2	startsnp=BovineHD1000003891	endsnp=BovineHD1000003934
chr10:14286516-14383028	numsnp=26	length=96,513	state2,cn=1	2	startsnp=BovineHD1000004770	endsnp=BovineHD1000004794
chr10:18667525-18878078	numsnp=39	length=210,554	state2,cn=1	2	startsnp=BovineHD1000006196	endsnp=BovineHD1000006231
chr10:38280704-38439355	numsnp=34	length=158,652	state2,cn=1	2	startsnp=BovineHD1000011857	endsnp=BovineHD1000011888
chr10:48150692-48226400	numsnp=38	length=75,709	state2,cn=1	2	startsnp=BovineHD1000014472	endsnp=BovineHD1000014512
chr10:51305855-51567559	numsnp=52	length=261,705	state2,cn=1	2	startsnp=BovineHD1000015398	endsnp=BovineHD1000015445
chr10:68179385-68334411	numsnp=58	length=155,027	state2,cn=1	2	startsnp=BovineHD1000019532	endsnp=BovineHD1000019588
chr10:70694211-70989965	numsnp=87	length=295,755	state2,cn=1	2	startsnp=BovineHD1000020270	endsnp=BovineHD1000020357
chr10:78911500-79312084	numsnp=82	length=400,585	state2,cn=1	2	startsnp=BovineHD1000022589	endsnp=BovineHD1000022668
chr11:62119-184589	numsnp=44	length=122,471	state2,cn=1	2	startsnp=BovineHD1100000009	endsnp=BovineHD1100000051
chr11:15003611-15144476	numsnp=27	length=140,866	state2,cn=1	2	startsnp=BovineHD1100031531	endsnp=BovineHD1100004843
chr11:21551925-21667739	numsnp=57	length=115,815	state2,cn=1	2	startsnp=BovineHD1100006465	endsnp=BovineHD1100006520
chr11:30449065-30558447	numsnp=26	length=109,383	state2,cn=1	2	startsnp=Hapmap27192-BTA-152811	endsnp=BovineHD4100008688
chr11:31911599-31984222	numsnp=25	length=72,624	state2,cn=1	2	startsnp=BovineHD1100009585	endsnp=BovineHD1100009609
chr11:58267632-58419387	numsnp=35	length=151,756	state2,cn=1	2	startsnp=BovineHD1100016769	endsnp=ARS-BFGL-BAC-11747
chr11:59809617-59953372	numsnp=27	length=143,756	state2,cn=1	2	startsnp=BovineHD1100017086	endsnp=BovineHD1100017109
chr11:61133854-61427895	numsnp=52	length=294,042	state2,cn=1	2	startsnp=BovineHD1100017428	endsnp=BovineHD1100017480
chr11:70865913-70986341	numsnp=30	length=120,429	state2,cn=1	2	startsnp=BovineHD1100020310	endsnp=BovineHD1100020339
chr11:103424705-103964287	numsnp=140	length=539,583	state2,cn=1	2	startsnp=BovineHD1100030110	endsnp=BovineHD1100030233
chr11:104464590-104685104	numsnp=59	length=220,515	state2,cn=1	2	startsnp=BovineHD1100030382	endsnp=BovineHD1100030438
chr11:104750956-105078068	numsnp=86	length=327,113	state2,cn=1	2	startsnp=BovineHD1100030460	endsnp=BovineHD1100030545
chr11:105617642-105750553	numsnp=33	length=132,912	state2,cn=1	2	startsnp=BovineHD1100030678	endsnp=BovineHD1100030704
chr11:106196578-106323701	numsnp=32	length=127,124	state2,cn=1	2	startsnp=BovineHD1100030807	endsnp=BovineHD1100030840
chr11:106586225-106749016	numsnp=81	length=162,792	state2,cn=1	2	startsnp=BovineHD1100030959	endsnp=BovineHD1100031034
chr12:16097311-16187847	numsnp=31	length=90,537	state2,cn=1	2	startsnp=BovineHD1200004845	endsnp=BovineHD4100009396
chr12:25968692-26535072	numsnp=120	length=566,381	state2,cn=1	2	startsnp=BovineHD1200026837	endsnp=BovineHD1200007939
chr12:28331350-28449408	numsnp=28	length=118,059	state2,cn=1	2	startsnp=BovineHD1200026852	endsnp=BovineHD1200008439
chr12:47788773-47911984	numsnp=35	length=123,212	state2,cn=1	2	startsnp=Hapmap31726-BTA-127593	endsnp=BovineHD1200013165
chr12:72455520-72522713	numsnp=31	length=67,194	state2,cn=1	2	startsnp=ARS-BFGL-NGS-2370	endsnp=BovineHD1200020009
chr12:77062650-77171122	numsnp=36	length=108,473	state2,cn=1	2	startsnp=BovineHD1200021768	endsnp=BovineHD1200021799
chr12:80924626-81051206	numsnp=63	length=126,581	state2,cn=1	2	startsnp=BovineHD1200023152	endsnp=BovineHD1200027158
chr12:87631468-87753632	numsnp=42	length=122,165	state2,cn=1	2	startsnp=BovineHD1200025581	endsnp=BovineHD1200025618
chr12:90496030-90789716	numsnp=84	length=293,687	state2,cn=1	2	startsnp=BovineHD1200026527	endsnp=BovineHD1200026599
chr13:14944963-15218135	numsnp=65	length=273,173	state2,cn=1	2	startsnp=BovineHD1300004248	endsnp=BovineHD1300004313
chr13:18056702-18179388	numsnp=46	length=122,687	state2,cn=1	2	startsnp=BovineHD1300005140	endsnp=BovineHD1300005182
chr13:20352649-20615821	numsnp=50	length=263,173	state2,cn=1	2	startsnp=BovineHD1300005925	endsnp=BTB-01233700
chr13:20965563-21110128	numsnp=71	length=144,566	state2,cn=1	2	startsnp=BovineHD1300006064	endsnp=BovineHD1300006131
chr13:23215544-23402797	numsnp=33	length=187,254	state2,cn=1	2	startsnp=BovineHD1300006760	endsnp=BovineHD1300006796
chr13:36782813-36833775	numsnp=18	length=50,963	state2,cn=1	2	startsnp=Hapmap25918-BTA-163236	endsnp=BovineHD1300010660
chr14:1549928-1868908	numsnp=61	length=318,981	state2,cn=1	2	startsnp=BovineHD1400000178	endsnp=ARS-BFGL-BAC-24080
chr14:2006872-2147133	numsnp=26	length=140,262	state2,cn=1	2	startsnp=BovineHD1400000273	endsnp=BovineHD1400000300
chr14:2790501-3129420	numsnp=89	length=338,920	state2,cn=1	2	startsnp=BovineHD4100010557	endsnp=BovineHD1400000538
chr14:3895208-4070255	numsnp=61	length=175,048	state2,cn=1	2	startsnp=BovineHD1400000792	endsnp=BovineHD1400000842
chr14:9529801-9605099	numsnp=26	length=75,299	state2,cn=1	2	startsnp=BovineHD1400002682	endsnp=BovineHD1400002699
chr14:33246785-33304950	numsnp=22	length=58,166	state2,cn=1	2	startsnp=BovineHD1400009529	endsnp=BovineHD1400009550
chr14:44047994-44144717	numsnp=31	length=96,724	state2,cn=1	2	startsnp=BovineHD1400012467	endsnp=BovineHD1400012494
chr14:50857512-51017829	numsnp=59	length=160,318	state2,cn=1	2	startsnp=BovineHD1400014435	endsnp=BovineHD1400014488
chr14:58063477-58438290	numsnp=67	length=374,814	state2,cn=1	2	startsnp=BovineHD1400016157	endsnp=BovineHD1400016222
chr14:59996266-60079018	numsnp=27	length=82,753	state2,cn=1	2	startsnp=BovineHD1400016625	endsnp=BovineHD1400016650
chr14:62246259-62305713	numsnp=18	length=59,455	state2,cn=1	2	startsnp=BovineHD1400017271	endsnp=BovineHD1400024146
chr14:62627737-62710391	numsnp=27	length=82,655	state2,cn=1	2	startsnp=BovineHD1400017419	endsnp=BovineHD1400017443
chr14:62782571-63004255	numsnp=50	length=221,685	state2,cn=1	2	startsnp=BovineHD1400017458	endsnp=BTB-01048106
chr14:66942233-67529191	numsnp=135	length=586,959	state2,cn=1	2	startsnp=BovineHD1400018721	endsnp=ARS-BFGL-NGS-107586
chr14:67772389-67834654	numsnp=20	length=62,266	state2,cn=1	2	startsnp=BovineHD1400018917	endsnp=BovineHD1400018936
chr14:71756527-71928766	numsnp=47	length=172,240	state2,cn=1	2	startsnp=BovineHD1400020107	endsnp=BovineHD1400020157
chr14:83547949-83605975	numsnp=26	length=58,027	state2,cn=1	2	startsnp=BovineHD1400023602	endsnp=BovineHD1400023626
chr15:17074274-17153857	numsnp=18	length=79,584	state2,cn=1	2	startsnp=BovineHD1500004351	endsnp=BovineHD1500004365
chr15:20463284-20557246	numsnp=35	length=93,963	state2,cn=1	2	startsnp=BovineHD1500005171	endsnp=BovineHD1500005204
chr15:20645813-20762546	numsnp=46	length=116,734	state2,cn=1	2	startsnp=BovineHD1500005236	endsnp=BovineHD1500005280
chr15:43243589-43308530	numsnp=17	length=64,942	state2,cn=1	2	startsnp=BovineHD1500012025	endsnp=Hapmap46538-BTA-88332
chr15:43791258-43879194	numsnp=29	length=87,937	state2,cn=1	2	startsnp=BovineHD1500012158	endsnp=BovineHD1500012183
chr15:47873132-48068620	numsnp=32	length=195,489	state2,cn=1	2	startsnp=BovineHD1500013731	endsnp=Hapmap55024-rs29015792
chr15:62908235-63281076	numsnp=90	length=372,842	state2,cn=1	2	startsnp=BovineHD1500018052	endsnp=BTB-01280741
chr15:79924127-79994463	numsnp=27	length=70,337	state2,cn=1	2	startsnp=BovineHD1500023310	endsnp=BovineHD1500023338
chr15:84877216-85224354	numsnp=92	length=347,139	state2,cn=1	2	startsnp=BovineHD1500024898	endsnp=BovineHD1500024984
chr16:26854532-27154383	numsnp=104	length=299,852	state2,cn=1	2	startsnp=BovineHD1600007415	endsnp=BovineHD1600007515
chr16:28959137-29019715	numsnp=36	length=60,579	state2,cn=1	2	startsnp=BovineHD1600008128	endsnp=BovineHD1600008162
chr16:38371856-38450491	numsnp=24	length=78,636	state2,cn=1	2	startsnp=BovineHD1600011020	endsnp=BovineHD1600011040
chr16:62599120-62757921	numsnp=30	length=158,802	state2,cn=1	2	startsnp=BovineHD1600017565	endsnp=BovineHD1600017589
chr16:68897723-69088226	numsnp=90	length=190,504	state2,cn=1	2	startsnp=BovineHD1600019513	endsnp=BovineHD1600019603
chr16:70814352-70924028	numsnp=24	length=109,677	state2,cn=1	2	startsnp=BovineHD1600020126	endsnp=BovineHD1600020149
chr16:71092127-71180683	numsnp=23	length=88,557	state2,cn=1	2	startsnp=BovineHD1600020185	endsnp=BovineHD1600020209
chr16:72343092-72433373	numsnp=36	length=90,282	state2,cn=1	2	startsnp=BovineHD1600020557	endsnp=BovineHD1600020591
chr16:78395279-78528854	numsnp=60	length=133,576	state2,cn=1	2	startsnp=BovineHD1600022799	endsnp=BovineHD1600022855
chr16:80134434-80273049	numsnp=53	length=138,616	state2,cn=1	2	startsnp=BovineHD1600023376	endsnp=BovineHD1600023432
chr17:6848602-7384739	numsnp=174	length=536,138	state2,cn=1	2	startsnp=BovineHD1700001971	endsnp=BovineHD1700002141
chr17:26101559-26166694	numsnp=23	length=65,136	state2,cn=1	2	startsnp=BovineHD1700007357	endsnp=BovineHD1700007390
chr17:30161342-30313751	numsnp=28	length=152,410	state2,cn=1	2	startsnp=BovineHD1700008508	endsnp=BovineHD1700008534
chr17:71841734-71900819	numsnp=27	length=59,086	state2,cn=1	2	startsnp=ARS-BFGL-NGS-5369	endsnp=BovineHD1700020948
chr17:73354100-73516198	numsnp=49	length=162,099	state2,cn=1	2	startsnp=BovineHD1700021435	endsnp=BovineHD1700021477
chr17:73569170-73858134	numsnp=96	length=288,965	state2,cn=1	2	startsnp=BovineHD1700021492	endsnp=BovineHD1700021585
chr17:74659475-75148791	numsnp=105	length=489,317	state2,cn=1	2	startsnp=BovineHD1700021807	endsnp=BovineHD1700022147
chr18:15547815-15680985	numsnp=38	length=133,171	state2,cn=1	2	startsnp=BovineHD1800004893	endsnp=BovineHD1800004928
chr18:21665648-21907413	numsnp=52	length=241,766	state2,cn=1	2	startsnp=BovineHD1800006681	endsnp=BovineHD1800006726
chr18:38573367-38893878	numsnp=50	length=320,512	state2,cn=1	2	startsnp=BovineHD1800011491	endsnp=BovineHD1800011534
chr19:12902838-13002657	numsnp=28	length=99,820	state2,cn=1	2	startsnp=BovineHD4100013950	endsnp=BovineHD1900003435
chr19:48181378-48305042	numsnp=31	length=123,665	state2,cn=1	2	startsnp=BovineHD1900013391	endsnp=BovineHD1900013418
chr20:2815927-2979227	numsnp=32	length=163,301	state2,cn=1	2	startsnp=BovineHD2000000978	endsnp=BovineHD2000001006
chr20:8468353-8768838	numsnp=63	length=300,486	state2,cn=1	2	startsnp=BovineHD2000002712	endsnp=BovineHD2000002766
chr20:70875830-71571246	numsnp=179	length=695,417	state2,cn=1	2	startsnp=BovineHD2000020746	endsnp=BovineHD2000020917
chr21:7056192-7239529	numsnp=75	length=183,338	state2,cn=1	2	startsnp=BovineHD2100001489	endsnp=BovineHD2100001568
chr21:41984152-42069103	numsnp=26	length=84,952	state2,cn=1	2	startsnp=BovineHD2100011966	endsnp=BovineHD2100011990
chr21:70221263-70421120	numsnp=69	length=199,858	state2,cn=1	2	startsnp=BovineHD2100020518	endsnp=BovineHD2100020579
chr21:70701216-70896927	numsnp=58	length=195,712	state2,cn=1	2	startsnp=BovineHD2100020703	endsnp=BovineHD2100020748
chr22:44104392-44355284	numsnp=54	length=250,893	state2,cn=1	2	startsnp=BovineHD2200012769	endsnp=BovineHD2200012817
chr22:59964685-60220816	numsnp=82	length=256,132	state2,cn=1	2	startsnp=BovineHD2200017401	endsnp=BovineHD2200017476
chr22:60459451-60546964	numsnp=29	length=87,514	state2,cn=1	2	startsnp=ARS-BFGL-NGS-41433	endsnp=BovineHD2200017619
chr22:60844745-61005174	numsnp=51	length=160,430	state2,cn=1	2	startsnp=BovineHD2200017724	endsnp=BovineHD2200017767
chr23:2927428-3167662	numsnp=67	length=240,235	state2,cn=1	2	startsnp=BovineHD2300000573	endsnp=UA-IFASA-4895
chr23:16298875-16381789	numsnp=22	length=82,915	state2,cn=1	2	startsnp=BovineHD2300004188	endsnp=BovineHD2300004204
chr23:18269354-18611522	numsnp=73	length=342,169	state2,cn=1	2	startsnp=BovineHD2300004669	endsnp=BovineHD2300015594
chr23:22274088-22372754	numsnp=27	length=98,667	state2,cn=1	2	startsnp=BovineHD2300005896	endsnp=BovineHD2300005922
chr23:51223451-52039933	numsnp=235	length=816,483	state2,cn=1	2	startsnp=BovineHD2300014902	endsnp=BovineHD2300015116
chr24:1118679-1322390	numsnp=62	length=203,712	state2,cn=1	2	startsnp=BovineHD2400000236	endsnp=BovineHD2400000292
chr24:3985606-4129193	numsnp=35	length=143,588	state2,cn=1	2	startsnp=BovineHD2400001101	endsnp=BovineHD2400001129
chr25:271849-659538	numsnp=98	length=387,690	state2,cn=1	2	startsnp=BovineHD2500000048	endsnp=BovineHD2500000133
chr25:776266-1209143	numsnp=115	length=432,878	state2,cn=1	2	startsnp=BovineHD2500000183	endsnp=BovineHD2500000272
chr25:19446579-19581064	numsnp=26	length=134,486	state2,cn=1	2	startsnp=BovineHD2500005407	endsnp=ARS-BFGL-NGS-31542
chr25:41129839-41374004	numsnp=71	length=244,166	state2,cn=1	2	startsnp=BovineHD4100017542	endsnp=BovineHD4100017560
chr25:41596286-41850541	numsnp=77	length=254,256	state2,cn=1	2	startsnp=ARS-BFGL-NGS-30598	endsnp=BovineHD2500011773
chr25:41953370-42760285	numsnp=202	length=806,916	state2,cn=1	2	startsnp=BovineHD4100017582	endsnp=BovineHD2500011963
chr26:20561955-20638570	numsnp=18	length=76,616	state2,cn=1	2	startsnp=BovineHD2600005334	endsnp=BovineHD2600005347
chr26:50816998-51291371	numsnp=122	length=474,374	state2,cn=1	2	startsnp=BovineHD2600014694	endsnp=BovineHD2600014810
chr26:51460945-51578480	numsnp=45	length=117,536	state2,cn=1	2	startsnp=ARS-BFGL-NGS-101725	endsnp=BovineHD2600014908
chr28:19527616-19674311	numsnp=44	length=146,696	state2,cn=1	2	startsnp=BovineHD2800005290	endsnp=BovineHD2800005334
chr28:24885275-25247007	numsnp=65	length=361,733	state2,cn=1	2	startsnp=BovineHD2800006444	endsnp=BovineHD2800006498
chr28:44291071-44409834	numsnp=42	length=118,764	state2,cn=1	2	startsnp=BovineHD2800012742	endsnp=BovineHD2800012782
chr29:48214437-48276737	numsnp=16	length=62,301	state2,cn=1	2	startsnp=BovineHD2900014239	endsnp=BovineHD2900014254
chr29:48914909-49140640	numsnp=49	length=225,732	state2,cn=1	2	startsnp=BovineHD2900014462	endsnp=BovineHD2900015619
chr29:49182244-49554813	numsnp=74	length=372,570	state2,cn=1	2	startsnp=BovineHD2900014514	endsnp=BovineHD2900014591
chr29:49997333-50207785	numsnp=33	length=210,453	state2,cn=1	2	startsnp=BovineHD2900014664	endsnp=BovineHD2900014695
chr29:50930941-51174708	numsnp=53	length=243,768	state2,cn=1	2	startsnp=BovineHD2900014857	endsnp=BovineHD2900014907
chr29:51257641-51502868	numsnp=53	length=245,228	state2,cn=1	2	startsnp=BovineHD2900014927	endsnp=ARS-BFGL-NGS-29340
chr4:115669622-116195971	numsnp=216	length=526,350	state5,cn=3	2	startsnp=BovineHD0400033520	endsnp=BovineHD0400033724
chr5:5101-214612	numsnp=38	length=209,512	state5,cn=3	2	startsnp=BovineHD0500000001	endsnp=BovineHD0500000050
chr11:105754154-105901297	numsnp=34	length=147,144	state5,cn=3	2	startsnp=BovineHD1100030705	endsnp=BovineHD1100030736
chr12:73860259-74395072	numsnp=16	length=534,814	state5,cn=3	2	startsnp=BovineHD1200020488	endsnp=BovineHD1200020674
chr13:43744476-44003400	numsnp=45	length=258,925	state5,cn=3	2	startsnp=BovineHD1300012779	endsnp=BovineHD1300012841
chr15:80003887-80055766	numsnp=15	length=51,880	state5,cn=3	2	startsnp=BTB-02096198	endsnp=BovineHD1500023354
chr16:70934371-71087185	numsnp=33	length=152,815	state5,cn=3	2	startsnp=BovineHD1600020150	endsnp=BovineHD1600020183
chr23:34779270-34866601	numsnp=17	length=87,332	state5,cn=3	2	startsnp=BovineHD2300010180	endsnp=BovineHD2300010200
chr29:38567737-39269818	numsnp=70	length=702,082	state5,cn=3	2	startsnp=BovineHD2900011663	endsnp=BovineHD2900011832
chr6:6502610-6902973	numsnp=78	length=400,364	state6,cn=4	2	startsnp=BovineHD0600001420	endsnp=BovineHD0600001493
chr1:93730576-93819471	numsnp=10	length=88,896	state1,cn=0	3	startsnp=BovineHD0100047110	endsnp=BovineHD0100026605
chr5:58376266-58441130	numsnp=10	length=64,865	state1,cn=0	3	startsnp=BovineHD0500016449	endsnp=BovineHD0500016460
chr5:102773939-102932410	numsnp=63	length=158,472	state1,cn=0	3	startsnp=BovineHD0500029439	endsnp=BovineHD0500029507
chr12:32054331-32162911	numsnp=13	length=108,581	state1,cn=0	3	startsnp=BovineHD1200009422	endsnp=BovineHD1200009451
chr12:70392108-70620665	numsnp=24	length=228,558	state1,cn=0	3	startsnp=BovineHD1200019356	endsnp=BovineHD1200019397
chr12:73754154-74327005	numsnp=18	length=572,852	state1,cn=0	3	startsnp=BovineHD1200020442	endsnp=BovineHD1200020644
chr12:74840021-75193156	numsnp=18	length=353,136	state1,cn=0	3	startsnp=BovineHD1200020836	endsnp=BovineHD1200020930
chr13:170016-329928	numsnp=15	length=159,913	state1,cn=0	3	startsnp=BovineHD1300000020	endsnp=BovineHD1300000050
chr15:47873132-47936886	numsnp=15	length=63,755	state1,cn=0	3	startsnp=BovineHD1500013731	endsnp=BTB-01881715
chr15:80176347-80316180	numsnp=34	length=139,834	state1,cn=0	3	startsnp=BovineHD1500026018	endsnp=BovineHD1500023410
chr16:5676289-5768249	numsnp=21	length=91,961	state1,cn=0	3	startsnp=BovineHD1600001604	endsnp=BovineHD1600001641
chr1:20033381-20093504	numsnp=23	length=60,124	state2,cn=1	3	startsnp=BovineHD0100005949	endsnp=BovineHD0100005969
chr1:20670704-20792484	numsnp=43	length=121,781	state2,cn=1	3	startsnp=BovineHD0100006120	endsnp=BovineHD0100006158
chr1:32451910-32644827	numsnp=63	length=192,918	state2,cn=1	3	startsnp=BovineHD0100009351	endsnp=BovineHD0100009412
chr1:35082635-35247683	numsnp=52	length=165,049	state2,cn=1	3	startsnp=BovineHD0100010061	endsnp=BovineHD0100010117
chr1:37814488-37945685	numsnp=66	length=131,198	state2,cn=1	3	startsnp=BovineHD0100010878	endsnp=BovineHD0100010943
chr1:60027340-60260551	numsnp=68	length=233,212	state2,cn=1	3	startsnp=BovineHD0100016970	endsnp=BovineHD0100017031
chr1:66240276-66494267	numsnp=69	length=253,992	state2,cn=1	3	startsnp=BovineHD0100018683	endsnp=BovineHD0100018748
chr1:72115021-72387471	numsnp=42	length=272,451	state2,cn=1	3	startsnp=BovineHD0100020680	endsnp=BovineHD0100020714
chr1:72758347-72924118	numsnp=41	length=165,772	state2,cn=1	3	startsnp=BovineHD0100020841	endsnp=BovineHD0100020880
chr1:76601238-76755599	numsnp=62	length=154,362	state2,cn=1	3	startsnp=BovineHD0100022072	endsnp=BovineHD0100022133
chr1:131423039-131495551	numsnp=24	length=72,513	state2,cn=1	3	startsnp=BTA-53040-no-rs	endsnp=BovineHD0100037383
chr1:147010912-147066830	numsnp=31	length=55,919	state2,cn=1	3	startsnp=BovineHD0100042491	endsnp=ARS-BFGL-NGS-1705
chr2:24714894-24891260	numsnp=35	length=176,367	state2,cn=1	3	startsnp=BovineHD0200007107	endsnp=BovineHD0200007154
chr2:31238054-31515457	numsnp=104	length=277,404	state2,cn=1	3	startsnp=BovineHD0200009241	endsnp=BovineHD0200009335
chr2:35193001-35277747	numsnp=19	length=84,747	state2,cn=1	3	startsnp=BovineHD0200010355	endsnp=BovineHD0200010371
chr2:36805443-37107860	numsnp=70	length=302,418	state2,cn=1	3	startsnp=BovineHD0200010796	endsnp=BovineHD0200040575
chr2:47963062-48448951	numsnp=118	length=485,890	state2,cn=1	3	startsnp=BovineHD0200013904	endsnp=BovineHD0200014012
chr2:51161504-51397309	numsnp=65	length=235,806	state2,cn=1	3	startsnp=BovineHD0200014670	endsnp=BovineHD0200014735
chr2:62171893-62312351	numsnp=33	length=140,459	state2,cn=1	3	startsnp=BovineHD0200017958	endsnp=BovineHD0200017992
chr2:101860421-102147637	numsnp=75	length=287,217	state2,cn=1	3	startsnp=BovineHD0200029238	endsnp=BovineHD0200029333
chr3:604022-787371	numsnp=45	length=183,350	state2,cn=1	3	startsnp=BovineHD0300000127	endsnp=ARS-BFGL-NGS-67047
chr3:15180087-15320333	numsnp=45	length=140,247	state2,cn=1	3	startsnp=BovineHD0300004945	endsnp=BovineHD0300004992
chr3:29045330-29095368	numsnp=15	length=50,039	state2,cn=1	3	startsnp=BovineHD0300009190	endsnp=BovineHD0300009204
chr3:43376774-43537606	numsnp=67	length=160,833	state2,cn=1	3	startsnp=BovineHD0300013191	endsnp=BovineHD0300013262
chr3:45355602-45453885	numsnp=25	length=98,284	state2,cn=1	3	startsnp=BovineHD0300013839	endsnp=BovineHD0300013861
chr3:57200004-57327809	numsnp=27	length=127,806	state2,cn=1	3	startsnp=BovineHD0300017251	endsnp=INRA-337
chr3:78728025-78842213	numsnp=35	length=114,189	state2,cn=1	3	startsnp=BovineHD0300022694	endsnp=BovineHD0300022730
chr3:79670682-79765949	numsnp=32	length=95,268	state2,cn=1	3	startsnp=BovineHD0300022959	endsnp=BovineHD0300022989
chr3:83491965-83667732	numsnp=44	length=175,768	state2,cn=1	3	startsnp=BovineHD0300023894	endsnp=BovineHD0300023929
chr3:94416488-94515232	numsnp=24	length=98,745	state2,cn=1	3	startsnp=BovineHD0300027205	endsnp=BovineHD0300036315
chr3:98358893-98558041	numsnp=79	length=199,149	state2,cn=1	3	startsnp=BovineHD0300028257	endsnp=BovineHD0300028333
chr3:110901226-111027481	numsnp=38	length=126,256	state2,cn=1	3	startsnp=BovineHD0300031907	endsnp=BovineHD0300031942
chr3:118071660-118137556	numsnp=19	length=65,897	state2,cn=1	3	startsnp=BovineHD0300034431	endsnp=BovineHD0300034447
chr3:120514016-120836801	numsnp=82	length=322,786	state2,cn=1	3	startsnp=BovineHD0300035241	endsnp=BovineHD0300035314
chr4:5683973-5849410	numsnp=31	length=165,438	state2,cn=1	3	startsnp=BovineHD0400001617	endsnp=BovineHD0400001658
chr4:48672797-48906767	numsnp=50	length=233,971	state2,cn=1	3	startsnp=BovineHD0400013379	endsnp=BovineHD0400013426
chr4:51318774-51371784	numsnp=12	length=53,011	state2,cn=1	3	startsnp=BovineHD0400014199	endsnp=BovineHD0400014207
chr4:63859455-64032945	numsnp=41	length=173,491	state2,cn=1	3	startsnp=BovineHD0400017487	endsnp=BovineHD0400017527
chr4:72375370-72513244	numsnp=29	length=137,875	state2,cn=1	3	startsnp=BovineHD0400020051	endsnp=BovineHD0400020079
chr4:78652494-78810039	numsnp=50	length=157,546	state2,cn=1	3	startsnp=BovineHD0400021810	endsnp=BovineHD0400021856
chr4:88782951-88837310	numsnp=16	length=54,360	state2,cn=1	3	startsnp=Hapmap55855-rs29017652	endsnp=BovineHD0400024598
chr4:89897538-90123550	numsnp=77	length=226,013	state2,cn=1	3	startsnp=BovineHD0400024891	endsnp=BovineHD0400024967
chr5:13427248-13562373	numsnp=41	length=135,126	state2,cn=1	3	startsnp=BovineHD0500035808	endsnp=BovineHD0500004097
chr5:15679130-15766061	numsnp=27	length=86,932	state2,cn=1	3	startsnp=BovineHD0500004625	endsnp=BovineHD0500004649
chr5:40780471-40879690	numsnp=30	length=99,220	state2,cn=1	3	startsnp=BovineHD0500011670	endsnp=BovineHD0500011695
chr5:51265925-51515066	numsnp=64	length=249,142	state2,cn=1	3	startsnp=BovineHD0500014753	endsnp=BovineHD0500014818
chr5:76582910-76758621	numsnp=23	length=175,712	state2,cn=1	3	startsnp=BovineHD0500021845	endsnp=BovineHD0500021862
chr5:79159916-79322625	numsnp=33	length=162,710	state2,cn=1	3	startsnp=BovineHD0500022469	endsnp=BovineHD0500022499
chr5:81849623-82058992	numsnp=39	length=209,370	state2,cn=1	3	startsnp=BovineHD0500023134	endsnp=BovineHD0500023177
chr6:32900590-33131396	numsnp=88	length=230,807	state2,cn=1	3	startsnp=BovineHD0600009221	endsnp=BovineHD4100004393
chr6:33316656-33414054	numsnp=27	length=97,399	state2,cn=1	3	startsnp=BovineHD4100004417	endsnp=BovineHD0600009333
chr6:38837159-38935296	numsnp=23	length=98,138	state2,cn=1	3	startsnp=BovineHD4100004577	endsnp=BovineHD0600010762
chr6:56249640-56531151	numsnp=72	length=281,512	state2,cn=1	3	startsnp=BovineHD0600015394	endsnp=BovineHD0600015460
chr6:89935963-90109989	numsnp=36	length=174,027	state2,cn=1	3	startsnp=BovineHD0600024652	endsnp=BovineHD0600024686
chr6:109072635-109844160	numsnp=151	length=771,526	state2,cn=1	3	startsnp=BovineHD0600030747	endsnp=BovineHD0600030892
chr6:118864808-119034735	numsnp=49	length=169,928	state2,cn=1	3	startsnp=BovineHD0600034013	endsnp=BovineHD0600034055
chr7:24107045-24286099	numsnp=54	length=179,055	state2,cn=1	3	startsnp=BovineHD0700006603	endsnp=BovineHD0700006654
chr7:38967158-39110034	numsnp=57	length=142,877	state2,cn=1	3	startsnp=BTB-01364730	endsnp=BTB-01364448
chr7:42516519-42861486	numsnp=88	length=344,968	state2,cn=1	3	startsnp=BovineHD0700012379	endsnp=BovineHD0700012465
chr7:47757812-47930150	numsnp=48	length=172,339	state2,cn=1	3	startsnp=BovineHD0700013812	endsnp=BovineHD0700013858
chr7:53536229-53641290	numsnp=60	length=105,062	state2,cn=1	3	startsnp=BovineHD0700015401	endsnp=BovineHD0700015465
chr7:53900821-53952520	numsnp=25	length=51,700	state2,cn=1	3	startsnp=BovineHD0700015547	endsnp=BovineHD0700015573
chr7:76839654-76959429	numsnp=26	length=119,776	state2,cn=1	3	startsnp=BovineHD0700022544	endsnp=BovineHD0700022564
chr7:109853214-110014198	numsnp=26	length=160,985	state2,cn=1	3	startsnp=BovineHD0700034063	endsnp=BovineHD0700032114
chr8:7220044-7282657	numsnp=20	length=62,614	state2,cn=1	3	startsnp=BovineHD0800002286	endsnp=BovineHD0800002305
chr8:26955095-27178949	numsnp=40	length=223,855	state2,cn=1	3	startsnp=BovineHD0800008141	endsnp=BovineHD0800008180
chr8:31694632-31777151	numsnp=26	length=82,520	state2,cn=1	3	startsnp=BovineHD0800009587	endsnp=ARS-BFGL-NGS-101576
chr8:53486832-53647856	numsnp=34	length=161,025	state2,cn=1	3	startsnp=BovineHD0800016070	endsnp=BovineHD0800016106
chr8:61634559-61848642	numsnp=60	length=214,084	state2,cn=1	3	startsnp=BovineHD0800018424	endsnp=BovineHD0800018481
chr8:94460889-94693789	numsnp=67	length=232,901	state2,cn=1	3	startsnp=ARS-BFGL-NGS-50038	endsnp=BovineHD0800028028
chr9:30222172-30286871	numsnp=26	length=64,700	state2,cn=1	3	startsnp=BovineHD0900008192	endsnp=BovineHD0900008215
chr9:36574394-36677939	numsnp=56	length=103,546	state2,cn=1	3	startsnp=BovineHD0900010062	endsnp=BovineHD0900010119
chr9:64771671-64848827	numsnp=13	length=77,157	state2,cn=1	3	startsnp=BovineHD0900017780	endsnp=BovineHD0900017793
chr9:70501867-70662914	numsnp=71	length=161,048	state2,cn=1	3	startsnp=BovineHD0900019502	endsnp=BovineHD0900019571
chr9:79095902-79191994	numsnp=23	length=96,093	state2,cn=1	3	startsnp=BovineHD0900022001	endsnp=Hapmap45612-BTA-28859
chr9:79547348-79816568	numsnp=68	length=269,221	state2,cn=1	3	startsnp=BovineHD0900022087	endsnp=BovineHD0900022158
chr9:99648129-99722691	numsnp=32	length=74,563	state2,cn=1	3	startsnp=BTA-85069-no-rs	endsnp=BovineHD0900028853
chr10:9115839-9245774	numsnp=44	length=129,936	state2,cn=1	3	startsnp=BovineHD1000002978	endsnp=BovineHD1000003022
chr10:11460618-11552955	numsnp=44	length=92,338	state2,cn=1	3	startsnp=BovineHD1000003891	endsnp=BovineHD1000003934
chr10:18728827-18878078	numsnp=29	length=149,252	state2,cn=1	3	startsnp=BovineHD1000030542	endsnp=BovineHD1000006231
chr10:22738750-23127194	numsnp=37	length=388,445	state2,cn=1	3	startsnp=BovineHD1000007426	endsnp=BovineHD1000007604
chr10:41326280-41541477	numsnp=45	length=215,198	state2,cn=1	3	startsnp=BovineHD1000012641	endsnp=BovineHD1000012678
chr10:48150692-48226400	numsnp=38	length=75,709	state2,cn=1	3	startsnp=BovineHD1000014472	endsnp=BovineHD1000014512
chr10:51305855-51567559	numsnp=52	length=261,705	state2,cn=1	3	startsnp=BovineHD1000015398	endsnp=BovineHD1000015445
chr10:68168140-68334411	numsnp=60	length=166,272	state2,cn=1	3	startsnp=BovineHD1000019530	endsnp=BovineHD1000019588
chr10:70750438-71065177	numsnp=104	length=314,740	state2,cn=1	3	startsnp=BovineHD1000020291	endsnp=BovineHD1000020398
chr10:78911500-79312084	numsnp=82	length=400,585	state2,cn=1	3	startsnp=BovineHD1000022589	endsnp=BovineHD1000022668
chr11:15003611-15144476	numsnp=27	length=140,866	state2,cn=1	3	startsnp=BovineHD1100031531	endsnp=BovineHD1100004843
chr11:21559452-21656279	numsnp=44	length=96,828	state2,cn=1	3	startsnp=BovineHD1100006467	endsnp=BovineHD1100006509
chr11:30449065-30563026	numsnp=27	length=113,962	state2,cn=1	3	startsnp=Hapmap27192-BTA-152811	endsnp=BovineHD1100009119
chr11:31911599-31967781	numsnp=22	length=56,183	state2,cn=1	3	startsnp=BovineHD1100009585	endsnp=BovineHD1100009605
chr11:58249719-58419387	numsnp=43	length=169,669	state2,cn=1	3	startsnp=BovineHD1100016761	endsnp=ARS-BFGL-BAC-11747
chr11:59809617-59953372	numsnp=27	length=143,756	state2,cn=1	3	startsnp=BovineHD1100017086	endsnp=BovineHD1100017109
chr11:65694352-65847914	numsnp=55	length=153,563	state2,cn=1	3	startsnp=BovineHD1100018553	endsnp=BovineHD1100018607
chr11:70865913-70986341	numsnp=30	length=120,429	state2,cn=1	3	startsnp=BovineHD1100020310	endsnp=BovineHD1100020339
chr11:103644879-104094452	numsnp=116	length=449,574	state2,cn=1	3	startsnp=BovineHD1100030159	endsnp=BovineHD1100030258
chr11:104464590-104685104	numsnp=59	length=220,515	state2,cn=1	3	startsnp=BovineHD1100030382	endsnp=BovineHD1100030438
chr11:105617642-105778702	numsnp=39	length=161,061	state2,cn=1	3	startsnp=BovineHD1100030678	endsnp=ARS-BFGL-NGS-41802
chr11:106186610-106459392	numsnp=79	length=272,783	state2,cn=1	3	startsnp=BovineHD4100009284	endsnp=BovineHD1100030884
chr11:106626509-106749016	numsnp=68	length=122,508	state2,cn=1	3	startsnp=BovineHD1100030970	endsnp=BovineHD1100031034
chr12:16097311-16187847	numsnp=31	length=90,537	state2,cn=1	3	startsnp=BovineHD1200004845	endsnp=BovineHD4100009396
chr12:25968692-26405287	numsnp=89	length=436,596	state2,cn=1	3	startsnp=BovineHD1200026837	endsnp=BovineHD1200007910
chr12:28331350-28449408	numsnp=28	length=118,059	state2,cn=1	3	startsnp=BovineHD1200026852	endsnp=BovineHD1200008439
chr12:37374215-37513132	numsnp=45	length=138,918	state2,cn=1	3	startsnp=BovineHD1200010841	endsnp=BovineHD1200010883
chr12:60218974-60294640	numsnp=30	length=75,667	state2,cn=1	3	startsnp=BovineHD1200016508	endsnp=BovineHD1200016538
chr13:14944963-15048109	numsnp=30	length=103,147	state2,cn=1	3	startsnp=BovineHD1300004248	endsnp=BovineHD1300004276
chr13:20352649-20615821	numsnp=50	length=263,173	state2,cn=1	3	startsnp=BovineHD1300005925	endsnp=BTB-01233700
chr13:20965563-21042957	numsnp=39	length=77,395	state2,cn=1	3	startsnp=BovineHD1300006064	endsnp=BovineHD1300024548
chr14:1549928-1873047	numsnp=62	length=323,120	state2,cn=1	3	startsnp=BovineHD1400000178	endsnp=BovineHD1400000244
chr14:2015554-2230450	numsnp=49	length=214,897	state2,cn=1	3	startsnp=BovineHD1400000274	endsnp=BovineHD4100010528
chr14:2790501-3219821	numsnp=120	length=429,321	state2,cn=1	3	startsnp=BovineHD4100010557	endsnp=BovineHD1400000570
chr14:9529801-9605099	numsnp=26	length=75,299	state2,cn=1	3	startsnp=BovineHD1400002682	endsnp=BovineHD1400002699
chr14:42662145-42973247	numsnp=83	length=311,103	state2,cn=1	3	startsnp=BovineHD1400012139	endsnp=BovineHD1400012216
chr14:44047994-44126252	numsnp=28	length=78,259	state2,cn=1	3	startsnp=BovineHD1400012467	endsnp=Hapmap43697-BTA-82657
chr14:59996266-60079018	numsnp=27	length=82,753	state2,cn=1	3	startsnp=BovineHD1400016625	endsnp=BovineHD1400016650
chr14:62627737-62710391	numsnp=27	length=82,655	state2,cn=1	3	startsnp=BovineHD1400017419	endsnp=BovineHD1400017443
chr14:62782571-63008806	numsnp=51	length=226,236	state2,cn=1	3	startsnp=BovineHD1400017458	endsnp=BovineHD1400017503
chr14:66819485-67489095	numsnp=161	length=669,611	state2,cn=1	3	startsnp=ARS-BFGL-NGS-115036	endsnp=BovineHD1400018846
chr14:71799582-71928766	numsnp=36	length=129,185	state2,cn=1	3	startsnp=BovineHD1400020118	endsnp=BovineHD1400020157
chr14:83547949-83605975	numsnp=26	length=58,027	state2,cn=1	3	startsnp=BovineHD1400023602	endsnp=BovineHD1400023626
chr15:10373621-10820150	numsnp=77	length=446,530	state2,cn=1	3	startsnp=BTB-00580768	endsnp=BovineHD1500025032
chr15:11393603-11534530	numsnp=56	length=140,928	state2,cn=1	3	startsnp=BovineHD4100011789	endsnp=BovineHD1500002942
chr15:43195359-43308530	numsnp=29	length=113,172	state2,cn=1	3	startsnp=BovineHD1500012013	endsnp=Hapmap46538-BTA-88332
chr15:43791258-43880771	numsnp=30	length=89,514	state2,cn=1	3	startsnp=BovineHD1500012158	endsnp=BovineHD1500012184
chr15:47946424-48047397	numsnp=12	length=100,974	state2,cn=1	3	startsnp=BovineHD1500025806	endsnp=BovineHD1500013779
chr15:64314134-64432293	numsnp=35	length=118,160	state2,cn=1	3	startsnp=BovineHD1500018415	endsnp=BovineHD1500025940
chr15:85005596-85224354	numsnp=55	length=218,759	state2,cn=1	3	startsnp=BovineHD1500024936	endsnp=BovineHD1500024984
chr16:5581530-5670600	numsnp=24	length=89,071	state2,cn=1	3	startsnp=BovineHD1600001562	endsnp=BovineHD1600001602
chr16:8335637-8486467	numsnp=26	length=150,831	state2,cn=1	3	startsnp=BovineHD1600002366	endsnp=BTA-88251-no-rs
chr16:27055885-27154383	numsnp=33	length=98,499	state2,cn=1	3	startsnp=BovineHD1600007484	endsnp=BovineHD1600007515
chr16:38371856-38450491	numsnp=24	length=78,636	state2,cn=1	3	startsnp=BovineHD1600011020	endsnp=BovineHD1600011040
chr16:38736638-38924807	numsnp=68	length=188,170	state2,cn=1	3	startsnp=BovineHD1600011100	endsnp=BovineHD1600011165
chr16:62661510-62742829	numsnp=16	length=81,320	state2,cn=1	3	startsnp=BovineHD1600017575	endsnp=BovineHD1600017586
chr16:68969160-69088226	numsnp=49	length=119,067	state2,cn=1	3	startsnp=BovineHD1600019556	endsnp=BovineHD1600019603
chr16:69247434-69308140	numsnp=18	length=60,707	state2,cn=1	3	startsnp=BovineHD1600019659	endsnp=BovineHD1600019676
chr16:70814352-70924028	numsnp=24	length=109,677	state2,cn=1	3	startsnp=BovineHD1600020126	endsnp=BovineHD1600020149
chr16:71092127-71180683	numsnp=23	length=88,557	state2,cn=1	3	startsnp=BovineHD1600020185	endsnp=BovineHD1600020209
chr16:78395279-78528854	numsnp=60	length=133,576	state2,cn=1	3	startsnp=BovineHD1600022799	endsnp=BovineHD1600022855
chr16:80188616-80273049	numsnp=35	length=84,434	state2,cn=1	3	startsnp=BovineHD1600023394	endsnp=BovineHD1600023432
chr17:6922287-7188339	numsnp=91	length=266,053	state2,cn=1	3	startsnp=BovineHD1700002004	endsnp=BovineHD1700002092
chr17:19951488-20003860	numsnp=16	length=52,373	state2,cn=1	3	startsnp=BovineHD1700005803	endsnp=BovineHD1700005817
chr17:20704416-21013897	numsnp=97	length=309,482	state2,cn=1	3	startsnp=BovineHD1700005993	endsnp=BovineHD1700006083
chr17:26098646-26166694	numsnp=24	length=68,049	state2,cn=1	3	startsnp=BovineHD1700021938	endsnp=BovineHD1700007390
chr17:34673625-34787754	numsnp=42	length=114,130	state2,cn=1	3	startsnp=BovineHD1700009595	endsnp=BovineHD1700009639
chr17:37680285-37772274	numsnp=28	length=91,990	state2,cn=1	3	startsnp=BovineHD1700010287	endsnp=ARS-BFGL-NGS-6358
chr17:71841734-71900819	numsnp=27	length=59,086	state2,cn=1	3	startsnp=ARS-BFGL-NGS-5369	endsnp=BovineHD1700020948
chr17:73354100-73516198	numsnp=49	length=162,099	state2,cn=1	3	startsnp=BovineHD1700021435	endsnp=BovineHD1700021477
chr17:73569170-73858134	numsnp=96	length=288,965	state2,cn=1	3	startsnp=BovineHD1700021492	endsnp=BovineHD1700021585
chr17:74836297-75148791	numsnp=58	length=312,495	state2,cn=1	3	startsnp=BovineHD1700021850	endsnp=BovineHD1700022147
chr18:21665648-21872521	numsnp=40	length=206,874	state2,cn=1	3	startsnp=BovineHD1800006681	endsnp=BovineHD1800006717
chr18:38688096-38893878	numsnp=29	length=205,783	state2,cn=1	3	startsnp=BTA-43161-no-rs	endsnp=BovineHD1800011534
chr19:2270929-2414418	numsnp=23	length=143,490	state2,cn=1	3	startsnp=Hapmap27040-BTA-25119	endsnp=BovineHD1900000534
chr19:12866238-13002657	numsnp=37	length=136,420	state2,cn=1	3	startsnp=BovineHD4100013945	endsnp=BovineHD1900003435
chr19:48181378-48305042	numsnp=31	length=123,665	state2,cn=1	3	startsnp=BovineHD1900013391	endsnp=BovineHD1900013418
chr20:8475414-8757679	numsnp=60	length=282,266	state2,cn=1	3	startsnp=BTB-00771346	endsnp=Hapmap25538-BTA-134885
chr20:26854463-26960799	numsnp=21	length=106,337	state2,cn=1	3	startsnp=BovineHD2000007977	endsnp=BovineHD2000007995
chr20:60604606-60706699	numsnp=30	length=102,094	state2,cn=1	3	startsnp=BovineHD2000017010	endsnp=BovineHD2000017039
chr20:70875830-71248034	numsnp=94	length=372,205	state2,cn=1	3	startsnp=BovineHD2000020746	endsnp=BovineHD2000020837
chr20:71272331-71571246	numsnp=79	length=298,916	state2,cn=1	3	startsnp=BovineHD2000020845	endsnp=BovineHD2000020917
chr21:7064177-7201269	numsnp=63	length=137,093	state2,cn=1	3	startsnp=BovineHD2100001493	endsnp=BovineHD2100001557
chr21:53450276-53653708	numsnp=39	length=203,433	state2,cn=1	3	startsnp=BovineHD2100015324	endsnp=BovineHD2100015356
chr21:70221263-70421120	numsnp=69	length=199,858	state2,cn=1	3	startsnp=BovineHD2100020518	endsnp=BovineHD2100020579
chr21:70701216-70850353	numsnp=46	length=149,138	state2,cn=1	3	startsnp=BovineHD2100020703	endsnp=BovineHD2100021446
chr22:44160849-44355284	numsnp=43	length=194,436	state2,cn=1	3	startsnp=BovineHD2200012779	endsnp=BovineHD2200012817
chr22:59964685-60220816	numsnp=82	length=256,132	state2,cn=1	3	startsnp=BovineHD2200017401	endsnp=BovineHD2200017476
chr22:60681268-61199665	numsnp=176	length=518,398	state2,cn=1	3	startsnp=BovineHD2200017659	endsnp=ARS-BFGL-NGS-105794
chr23:2965430-3182321	numsnp=60	length=216,892	state2,cn=1	3	startsnp=Hapmap44605-BTA-55952	endsnp=BovineHD2300000642
chr23:18269354-18553639	numsnp=62	length=284,286	state2,cn=1	3	startsnp=BovineHD2300004669	endsnp=BovineHD2300004724
chr23:51778492-52015979	numsnp=65	length=237,488	state2,cn=1	3	startsnp=BovineHD2300015053	endsnp=BovineHD2300015109
chr25:520071-659538	numsnp=45	length=139,468	state2,cn=1	3	startsnp=ARS-BFGL-NGS-20408	endsnp=BovineHD2500000133
chr25:768930-1209143	numsnp=116	length=440,214	state2,cn=1	3	startsnp=BovineHD2500000182	endsnp=BovineHD2500000272
chr25:1712523-2011350	numsnp=74	length=298,828	state2,cn=1	3	startsnp=ARS-BFGL-NGS-15062	endsnp=BovineHD2500000406
chr25:41129839-41374004	numsnp=71	length=244,166	state2,cn=1	3	startsnp=BovineHD4100017542	endsnp=BovineHD4100017560
chr25:41596286-41850541	numsnp=77	length=254,256	state2,cn=1	3	startsnp=ARS-BFGL-NGS-30598	endsnp=BovineHD2500011773
chr25:41953370-42740703	numsnp=196	length=787,334	state2,cn=1	3	startsnp=BovineHD4100017582	endsnp=BovineHD2500012250
chr26:20561955-20638570	numsnp=18	length=76,616	state2,cn=1	3	startsnp=BovineHD2600005334	endsnp=BovineHD2600005347
chr26:50842832-51291371	numsnp=112	length=448,540	state2,cn=1	3	startsnp=ARS-BFGL-NGS-948	endsnp=BovineHD2600014810
chr26:51366524-51680135	numsnp=119	length=313,612	state2,cn=1	3	startsnp=BovineHD2600014832	endsnp=ARS-BFGL-NGS-17431
chr28:19549475-19674311	numsnp=39	length=124,837	state2,cn=1	3	startsnp=BovineHD2800005295	endsnp=BovineHD2800005334
chr28:24885275-25219425	numsnp=60	length=334,151	state2,cn=1	3	startsnp=BovineHD2800006444	endsnp=BovineHD2800006494
chr29:48214437-48276737	numsnp=16	length=62,301	state2,cn=1	3	startsnp=BovineHD2900014239	endsnp=BovineHD2900014254
chr29:48914909-49140640	numsnp=49	length=225,732	state2,cn=1	3	startsnp=BovineHD2900014462	endsnp=BovineHD2900015619
chr29:49182244-49554813	numsnp=74	length=372,570	state2,cn=1	3	startsnp=BovineHD2900014514	endsnp=BovineHD2900014591
chr29:49997333-50207785	numsnp=33	length=210,453	state2,cn=1	3	startsnp=BovineHD2900014664	endsnp=BovineHD2900014695
chr29:50536728-50836801	numsnp=66	length=300,074	state2,cn=1	3	startsnp=BovineHD2900014765	endsnp=BovineHD2900014828
chr10:23133923-23222741	numsnp=11	length=88,819	state5,cn=3	3	startsnp=BovineHD1000007608	endsnp=BovineHD1000007632
chr12:70645065-71274536	numsnp=28	length=629,472	state5,cn=3	3	startsnp=BovineHD1200019402	endsnp=BovineHD1200019530
chr14:62713422-62769117	numsnp=13	length=55,696	state5,cn=3	3	startsnp=BovineHD1400017444	endsnp=BovineHD1400017455
chr23:34779270-34866601	numsnp=17	length=87,332	state5,cn=3	3	startsnp=BovineHD2300010180	endsnp=BovineHD2300010200
chr29:38567737-38797907	numsnp=41	length=230,171	state5,cn=3	3	startsnp=BovineHD2900011663	endsnp=BovineHD2900011743
chr6:6502610-6902973	numsnp=78	length=400,364	state6,cn=4	3	startsnp=BovineHD0600001420	endsnp=BovineHD0600001493
chr5:102598125-102680484	numsnp=10	length=82,360	state1,cn=0	4	startsnp=BovineHD0500029371	endsnp=BovineHD0500029396
chr10:22709100-22960303	numsnp=28	length=251,204	state1,cn=0	4	startsnp=BovineHD1000007420	endsnp=BovineHD1000007528
chr12:32054331-32182960	numsnp=16	length=128,630	state1,cn=0	4	startsnp=BovineHD1200009422	endsnp=BovineHD1200027784
chr12:70392108-70618867	numsnp=23	length=226,760	state1,cn=0	4	startsnp=BovineHD1200019356	endsnp=BovineHD1200019396
chr12:72748544-72882991	numsnp=11	length=134,448	state1,cn=0	4	startsnp=BovineHD1200020098	endsnp=BovineHD1200020124
chr13:170016-329928	numsnp=15	length=159,913	state1,cn=0	4	startsnp=BovineHD1300000020	endsnp=BovineHD1300000050
chr15:46805089-46935735	numsnp=13	length=130,647	state1,cn=0	4	startsnp=BovineHD1500013344	endsnp=BovineHD1500025797
chr15:47873132-47936886	numsnp=15	length=63,755	state1,cn=0	4	startsnp=BovineHD1500013731	endsnp=BTB-01881715
chr16:8091686-8163296	numsnp=16	length=71,611	state1,cn=0	4	startsnp=BovineHD1600002309	endsnp=BovineHD1600002324
chr1:20033381-20093504	numsnp=23	length=60,124	state2,cn=1	4	startsnp=BovineHD0100005949	endsnp=BovineHD0100005969
chr1:72759693-72931620	numsnp=41	length=171,928	state2,cn=1	4	startsnp=BovineHD0100020842	endsnp=BovineHD0100020881
chr1:147010912-147066830	numsnp=31	length=55,919	state2,cn=1	4	startsnp=BovineHD0100042491	endsnp=ARS-BFGL-NGS-1705
chr1:147337528-147410842	numsnp=24	length=73,315	state2,cn=1	4	startsnp=BovineHD0100042605	endsnp=BovineHD0100042628
chr1:157138014-157273077	numsnp=47	length=135,064	state2,cn=1	4	startsnp=BovineHD0100046863	endsnp=BovineHD0100045991
chr2:24714894-24889494	numsnp=34	length=174,601	state2,cn=1	4	startsnp=BovineHD0200007107	endsnp=BovineHD0200007153
chr2:48003476-48176523	numsnp=37	length=173,048	state2,cn=1	4	startsnp=BovineHD0200013914	endsnp=BovineHD0200013949
chr2:48306020-48448951	numsnp=37	length=142,932	state2,cn=1	4	startsnp=BovineHD4100001194	endsnp=BovineHD0200014012
chr2:136142090-136248228	numsnp=46	length=106,139	state2,cn=1	4	startsnp=BovineHD0200039905	endsnp=ARS-BFGL-NGS-14555
chr3:604022-787371	numsnp=45	length=183,350	state2,cn=1	4	startsnp=BovineHD0300000127	endsnp=ARS-BFGL-NGS-67047
chr3:43376774-43537606	numsnp=67	length=160,833	state2,cn=1	4	startsnp=BovineHD0300013191	endsnp=BovineHD0300013262
chr3:78728025-78837660	numsnp=32	length=109,636	state2,cn=1	4	startsnp=BovineHD0300022694	endsnp=BovineHD0300022727
chr3:79670682-79765949	numsnp=32	length=95,268	state2,cn=1	4	startsnp=BovineHD0300022959	endsnp=BovineHD0300022989
chr3:83491965-83667732	numsnp=44	length=175,768	state2,cn=1	4	startsnp=BovineHD0300023894	endsnp=BovineHD0300023929
chr3:94423069-94515232	numsnp=22	length=92,164	state2,cn=1	4	startsnp=BovineHD0300027207	endsnp=BovineHD0300036315
chr3:98462466-98552988	numsnp=37	length=90,523	state2,cn=1	4	startsnp=BovineHD0300028298	endsnp=INRA-437
chr3:118071660-118223070	numsnp=42	length=151,411	state2,cn=1	4	startsnp=BovineHD0300034431	endsnp=BovineHD0300034467
chr3:120552193-121293240	numsnp=215	length=741,048	state2,cn=1	4	startsnp=BovineHD0300035250	endsnp=BovineHD0300035445
chr4:51318774-51371784	numsnp=12	length=53,011	state2,cn=1	4	startsnp=BovineHD0400014199	endsnp=BovineHD0400014207
chr4:63964249-64044409	numsnp=20	length=80,161	state2,cn=1	4	startsnp=BovineHD0400017508	endsnp=BovineHD0400017529
chr4:72375370-72513244	numsnp=29	length=137,875	state2,cn=1	4	startsnp=BovineHD0400020051	endsnp=BovineHD0400020079
chr4:88782951-88837310	numsnp=16	length=54,360	state2,cn=1	4	startsnp=Hapmap55855-rs29017652	endsnp=BovineHD0400024598
chr4:89897538-89962567	numsnp=27	length=65,030	state2,cn=1	4	startsnp=BovineHD0400024891	endsnp=BovineHD0400024917
chr5:40780471-40879690	numsnp=30	length=99,220	state2,cn=1	4	startsnp=BovineHD0500011670	endsnp=BovineHD0500011695
chr5:51265925-51515066	numsnp=64	length=249,142	state2,cn=1	4	startsnp=BovineHD0500014753	endsnp=BovineHD0500014818
chr5:100039345-100129380	numsnp=36	length=90,036	state2,cn=1	4	startsnp=BovineHD0500028624	endsnp=BovineHD0500028662
chr5:102770798-102954266	numsnp=66	length=183,469	state2,cn=1	4	startsnp=BovineHD0500029438	endsnp=Hapmap40294-BTA-89295
chr5:116980784-117133270	numsnp=46	length=152,487	state2,cn=1	4	startsnp=BovineHD0500033978	endsnp=ARS-BFGL-NGS-96175
chr5:117938671-118034651	numsnp=28	length=95,981	state2,cn=1	4	startsnp=ARS-BFGL-NGS-37762	endsnp=BovineHD0500034268
chr5:119408760-119989587	numsnp=169	length=580,828	state2,cn=1	4	startsnp=ARS-BFGL-NGS-25107	endsnp=BovineHD0500035043
chr6:33029330-33131396	numsnp=41	length=102,067	state2,cn=1	4	startsnp=BovineHD0600009251	endsnp=BovineHD4100004393
chr6:38837159-38931436	numsnp=22	length=94,278	state2,cn=1	4	startsnp=BovineHD4100004577	endsnp=BovineHD0600034280
chr6:56452079-56527704	numsnp=20	length=75,626	state2,cn=1	4	startsnp=BovineHD0600015443	endsnp=BovineHD0600015459
chr6:89935963-90115548	numsnp=37	length=179,586	state2,cn=1	4	startsnp=BovineHD0600024652	endsnp=BovineHD0600024687
chr6:106922320-107295187	numsnp=128	length=372,868	state2,cn=1	4	startsnp=BovineHD0600030056	endsnp=BovineHD0600030186
chr6:109019350-109844160	numsnp=169	length=824,811	state2,cn=1	4	startsnp=BovineHD0600030730	endsnp=BovineHD0600030892
chr6:113449127-113670492	numsnp=64	length=221,366	state2,cn=1	4	startsnp=BovineHD0600032087	endsnp=BovineHD0600032155
chr7:24123535-24286099	numsnp=50	length=162,565	state2,cn=1	4	startsnp=BovineHD0700006608	endsnp=BovineHD0700006654
chr7:43228786-43330896	numsnp=26	length=102,111	state2,cn=1	4	startsnp=BovineHD0700012542	endsnp=BovineHD0700012567
chr7:47757812-47856478	numsnp=26	length=98,667	state2,cn=1	4	startsnp=BovineHD0700013812	endsnp=BovineHD0700013836
chr7:53536229-53641290	numsnp=60	length=105,062	state2,cn=1	4	startsnp=BovineHD0700015401	endsnp=BovineHD0700015465
chr7:53900821-53952520	numsnp=25	length=51,700	state2,cn=1	4	startsnp=BovineHD0700015547	endsnp=BovineHD0700015573
chr7:109890025-110054712	numsnp=20	length=164,688	state2,cn=1	4	startsnp=ARS-BFGL-NGS-81660	endsnp=BovineHD0700034065
chr8:26955095-27159357	numsnp=37	length=204,263	state2,cn=1	4	startsnp=BovineHD0800008141	endsnp=BovineHD0800008176
chr8:53486832-53590531	numsnp=21	length=103,700	state2,cn=1	4	startsnp=BovineHD0800016070	endsnp=BovineHD0800016093
chr9:9703050-9775082	numsnp=20	length=72,033	state2,cn=1	4	startsnp=BovineHD0900002374	endsnp=BovineHD0900002394
chr9:64745958-64848827	numsnp=18	length=102,870	state2,cn=1	4	startsnp=BovineHD0900017775	endsnp=BovineHD0900017793
chr9:103838370-103927141	numsnp=46	length=88,772	state2,cn=1	4	startsnp=BovineHD0900030462	endsnp=BovineHD0900030504
chr10:51363649-51567559	numsnp=37	length=203,911	state2,cn=1	4	startsnp=BovineHD1000015412	endsnp=BovineHD1000015445
chr10:70801482-70878349	numsnp=16	length=76,868	state2,cn=1	4	startsnp=BovineHD1000020304	endsnp=BovineHD1000020317
chr10:79106293-79312084	numsnp=52	length=205,792	state2,cn=1	4	startsnp=BovineHD1000022619	endsnp=BovineHD1000022668
chr11:83889-193193	numsnp=48	length=109,305	state2,cn=1	4	startsnp=BovineHD1100000011	endsnp=BovineHD1100000056
chr11:21559452-21656279	numsnp=44	length=96,828	state2,cn=1	4	startsnp=BovineHD1100006467	endsnp=BovineHD1100006509
chr11:58267632-58419387	numsnp=35	length=151,756	state2,cn=1	4	startsnp=BovineHD1100016769	endsnp=ARS-BFGL-BAC-11747
chr11:70865913-70986341	numsnp=30	length=120,429	state2,cn=1	4	startsnp=BovineHD1100020310	endsnp=BovineHD1100020339
chr11:75098286-75214720	numsnp=38	length=116,435	state2,cn=1	4	startsnp=BovineHD1100021397	endsnp=BovineHD1100021434
chr11:103644879-103904481	numsnp=65	length=259,603	state2,cn=1	4	startsnp=BovineHD1100030159	endsnp=BovineHD1100030217
chr11:104464590-104679644	numsnp=57	length=215,055	state2,cn=1	4	startsnp=BovineHD1100030382	endsnp=ARS-BFGL-NGS-26791
chr11:104851641-105078068	numsnp=57	length=226,428	state2,cn=1	4	startsnp=BovineHD1100030485	endsnp=BovineHD1100030545
chr11:105635510-105791903	numsnp=36	length=156,394	state2,cn=1	4	startsnp=BovineHD1100030681	endsnp=BovineHD1100030711
chr11:106196578-106512595	numsnp=102	length=316,018	state2,cn=1	4	startsnp=BovineHD1100030807	endsnp=BovineHD1100030909
chr11:106626509-106749016	numsnp=68	length=122,508	state2,cn=1	4	startsnp=BovineHD1100030970	endsnp=BovineHD1100031034
chr11:106861085-107024981	numsnp=27	length=163,897	state2,cn=1	4	startsnp=BovineHD1100031085	endsnp=BovineHD1100031115
chr12:37126744-37222851	numsnp=22	length=96,108	state2,cn=1	4	startsnp=BovineHD1200010786	endsnp=BovineHD1200010805
chr12:89237650-89360668	numsnp=48	length=123,019	state2,cn=1	4	startsnp=BovineHD1200026126	endsnp=BovineHD1200026173
chr12:90496030-90805949	numsnp=86	length=309,920	state2,cn=1	4	startsnp=BovineHD1200026527	endsnp=ARS-BFGL-NGS-44210
chr13:20965563-21042957	numsnp=39	length=77,395	state2,cn=1	4	startsnp=BovineHD1300006064	endsnp=BovineHD1300024548
chr13:36782813-36833775	numsnp=18	length=50,963	state2,cn=1	4	startsnp=Hapmap25918-BTA-163236	endsnp=BovineHD1300010660
chr14:1549928-1873047	numsnp=62	length=323,120	state2,cn=1	4	startsnp=BovineHD1400000178	endsnp=BovineHD1400000244
chr14:2015554-2230450	numsnp=49	length=214,897	state2,cn=1	4	startsnp=BovineHD1400000274	endsnp=BovineHD4100010528
chr14:2790501-3146886	numsnp=95	length=356,386	state2,cn=1	4	startsnp=BovineHD4100010557	endsnp=BovineHD1400000544
chr14:44047994-44144717	numsnp=31	length=96,724	state2,cn=1	4	startsnp=BovineHD1400012467	endsnp=BovineHD1400012494
chr14:62627737-62689223	numsnp=22	length=61,487	state2,cn=1	4	startsnp=BovineHD1400017419	endsnp=BovineHD1400017438
chr14:67009214-67489095	numsnp=112	length=479,882	state2,cn=1	4	startsnp=BovineHD1400018735	endsnp=BovineHD1400018846
chr14:83547949-83615008	numsnp=33	length=67,060	state2,cn=1	4	startsnp=BovineHD1400023602	endsnp=BovineHD1400023633
chr15:20463284-20532885	numsnp=27	length=69,602	state2,cn=1	4	startsnp=BovineHD1500005171	endsnp=BovineHD1500005197
chr15:43791258-43879194	numsnp=29	length=87,937	state2,cn=1	4	startsnp=BovineHD1500012158	endsnp=BovineHD1500012183
chr15:47946424-48047397	numsnp=12	length=100,974	state2,cn=1	4	startsnp=BovineHD1500025806	endsnp=BovineHD1500013779
chr15:80157078-80408863	numsnp=41	length=251,786	state2,cn=1	4	startsnp=BovineHD1500023367	endsnp=BovineHD1500023423
chr15:84915641-85224354	numsnp=84	length=308,714	state2,cn=1	4	startsnp=BovineHD1500024906	endsnp=BovineHD1500024984
chr16:5670600-5789669	numsnp=28	length=119,070	state2,cn=1	4	startsnp=BovineHD1600001602	endsnp=BovineHD1600001649
chr16:38371856-38450491	numsnp=24	length=78,636	state2,cn=1	4	startsnp=BovineHD1600011020	endsnp=BovineHD1600011040
chr16:50717279-50808755	numsnp=28	length=91,477	state2,cn=1	4	startsnp=BovineHD1600014105	endsnp=BovineHD1600014129
chr16:70814352-70924028	numsnp=24	length=109,677	state2,cn=1	4	startsnp=BovineHD1600020126	endsnp=BovineHD1600020149
chr16:71083442-71180683	numsnp=26	length=97,242	state2,cn=1	4	startsnp=BovineHD1600020182	endsnp=BovineHD1600020209
chr17:6932461-7112254	numsnp=57	length=179,794	state2,cn=1	4	startsnp=BovineHD1700002006	endsnp=BovineHD1700002061
chr17:37696593-37772274	numsnp=25	length=75,682	state2,cn=1	4	startsnp=BovineHD4100013038	endsnp=ARS-BFGL-NGS-6358
chr17:73354100-73516198	numsnp=49	length=162,099	state2,cn=1	4	startsnp=BovineHD1700021435	endsnp=BovineHD1700021477
chr17:73569170-73858134	numsnp=96	length=288,965	state2,cn=1	4	startsnp=BovineHD1700021492	endsnp=BovineHD1700021585
chr17:74794960-75148791	numsnp=63	length=353,832	state2,cn=1	4	startsnp=BovineHD1700021845	endsnp=BovineHD1700022147
chr18:21665648-21805397	numsnp=30	length=139,750	state2,cn=1	4	startsnp=BovineHD1800006681	endsnp=BovineHD1800006706
chr20:71114595-71571246	numsnp=127	length=456,652	state2,cn=1	4	startsnp=BovineHD2000020801	endsnp=BovineHD2000020917
chr21:70221263-70449176	numsnp=85	length=227,914	state2,cn=1	4	startsnp=BovineHD2100020518	endsnp=BovineHD2100020597
chr21:70701216-71196532	numsnp=114	length=495,317	state2,cn=1	4	startsnp=BovineHD2100020703	endsnp=BovineHD2100020801
chr22:59979559-60220816	numsnp=79	length=241,258	state2,cn=1	4	startsnp=BovineHD2200017404	endsnp=BovineHD2200017476
chr22:60470891-61199665	numsnp=239	length=728,775	state2,cn=1	4	startsnp=BovineHD2200017599	endsnp=ARS-BFGL-NGS-105794
chr23:29215689-29283590	numsnp=27	length=67,902	state2,cn=1	4	startsnp=BovineHD2300008305	endsnp=BovineHD2300008334
chr23:50186819-50331028	numsnp=51	length=144,210	state2,cn=1	4	startsnp=BovineHD2300014635	endsnp=BovineHD2300014686
chr23:51223451-51432462	numsnp=59	length=209,012	state2,cn=1	4	startsnp=BovineHD2300014902	endsnp=BovineHD4100016331
chr25:271849-659538	numsnp=98	length=387,690	state2,cn=1	4	startsnp=BovineHD2500000048	endsnp=BovineHD2500000133
chr25:767659-1214553	numsnp=119	length=446,895	state2,cn=1	4	startsnp=BovineHD2500000181	endsnp=BovineHD2500000273
chr25:39733401-39807389	numsnp=29	length=73,989	state2,cn=1	4	startsnp=BovineHD2500011086	endsnp=BovineHD2500011108
chr25:41174512-41374004	numsnp=53	length=199,493	state2,cn=1	4	startsnp=BovineHD2500011618	endsnp=BovineHD4100017560
chr25:41596286-42370881	numsnp=209	length=774,596	state2,cn=1	4	startsnp=ARS-BFGL-NGS-30598	endsnp=BovineHD2500011869
chr25:42492384-42740703	numsnp=70	length=248,320	state2,cn=1	4	startsnp=BovineHD2500011891	endsnp=BovineHD2500012250
chr26:49537890-49702051	numsnp=45	length=164,162	state2,cn=1	4	startsnp=BovineHD2600014273	endsnp=BovineHD2600014313
chr26:50866198-51291371	numsnp=109	length=425,174	state2,cn=1	4	startsnp=BovineHD2600014706	endsnp=BovineHD2600014810
chr26:51465159-51680135	numsnp=75	length=214,977	state2,cn=1	4	startsnp=BovineHD2600014873	endsnp=ARS-BFGL-NGS-17431
chr29:48214437-48276737	numsnp=16	length=62,301	state2,cn=1	4	startsnp=BovineHD2900014239	endsnp=BovineHD2900014254
chr29:49320006-49527343	numsnp=39	length=207,338	state2,cn=1	4	startsnp=BovineHD2900014545	endsnp=BovineHD2900014581
chr29:49666863-49812821	numsnp=27	length=145,959	state2,cn=1	4	startsnp=BovineHD2900014606	endsnp=BovineHD2900014632
chr29:49997333-50230041	numsnp=40	length=232,709	state2,cn=1	4	startsnp=BovineHD2900014664	endsnp=BovineHD2900014701
chr29:50243726-50320816	numsnp=19	length=77,091	state2,cn=1	4	startsnp=BovineHD2900014703	endsnp=BovineHD2900014720
chr29:50935519-51174708	numsnp=52	length=239,190	state2,cn=1	4	startsnp=BovineHD4100019181	endsnp=BovineHD2900014907
chr5:5101-189013	numsnp=33	length=183,913	state5,cn=3	4	startsnp=BovineHD0500000001	endsnp=BovineHD0500000044
chr5:59496240-59619562	numsnp=13	length=123,323	state5,cn=3	4	startsnp=BovineHD0500016674	endsnp=BovineHD0500016690
chr10:23125923-23938808	numsnp=49	length=812,886	state5,cn=3	4	startsnp=BovineHD1000007603	endsnp=BovineHD1000007863
chr15:80511026-81177489	numsnp=99	length=666,464	state5,cn=3	4	startsnp=BovineHD1500023439	endsnp=BovineHD1500023637
chr29:38567737-39269818	numsnp=70	length=702,082	state5,cn=3	4	startsnp=BovineHD2900011663	endsnp=BovineHD2900011832
chr6:6502610-6902973	numsnp=78	length=400,364	state6,cn=4	4	startsnp=BovineHD0600001420	endsnp=BovineHD0600001493
chr1:93730576-93819471	numsnp=10	length=88,896	state1,cn=0	5	startsnp=BovineHD0100047110	endsnp=BovineHD0100026605
chr5:58376266-58441130	numsnp=10	length=64,865	state1,cn=0	5	startsnp=BovineHD0500016449	endsnp=BovineHD0500016460
chr5:102773939-102932410	numsnp=63	length=158,472	state1,cn=0	5	startsnp=BovineHD0500029439	endsnp=BovineHD0500029507
chr7:10044994-10616512	numsnp=53	length=571,519	state1,cn=0	5	startsnp=BovineHD0700002633	endsnp=BovineHD0700002781
chr7:11136869-11261305	numsnp=26	length=124,437	state1,cn=0	5	startsnp=BovineHD0700032940	endsnp=BovineHD0700002975
chr12:32054331-32162911	numsnp=13	length=108,581	state1,cn=0	5	startsnp=BovineHD1200009422	endsnp=BovineHD1200009451
chr12:70392108-70620665	numsnp=24	length=228,558	state1,cn=0	5	startsnp=BovineHD1200019356	endsnp=BovineHD1200019397
chr12:71440002-71949321	numsnp=20	length=509,320	state1,cn=0	5	startsnp=BovineHD1200019600	endsnp=BovineHD1200019756
chr12:72511101-72882991	numsnp=79	length=371,891	state1,cn=0	5	startsnp=BovineHD1200020004	endsnp=BovineHD1200020124
chr15:46805089-46935735	numsnp=13	length=130,647	state1,cn=0	5	startsnp=BovineHD1500013344	endsnp=BovineHD1500025797
chr15:80090566-80529996	numsnp=49	length=439,431	state1,cn=0	5	startsnp=BovineHD1500023358	endsnp=BovineHD1500026023
chr1:20033381-20084515	numsnp=21	length=51,135	state2,cn=1	5	startsnp=BovineHD0100005949	endsnp=ARS-BFGL-NGS-116430
chr1:20670704-20792484	numsnp=43	length=121,781	state2,cn=1	5	startsnp=BovineHD0100006120	endsnp=BovineHD0100006158
chr1:27972969-28135135	numsnp=46	length=162,167	state2,cn=1	5	startsnp=BovineHD0100008321	endsnp=BovineHD0100008364
chr1:29907369-29983723	numsnp=24	length=76,355	state2,cn=1	5	startsnp=BovineHD0100008822	endsnp=BovineHD0100008847
chr1:30037313-30263673	numsnp=60	length=226,361	state2,cn=1	5	startsnp=BovineHD0100008855	endsnp=BovineHD0100008908
chr1:32889594-33036107	numsnp=39	length=146,514	state2,cn=1	5	startsnp=BovineHD0100009470	endsnp=BTB-00015939
chr1:33264922-33379427	numsnp=38	length=114,506	state2,cn=1	5	startsnp=BovineHD0100009593	endsnp=BovineHD0100009627
chr1:37808819-37878325	numsnp=43	length=69,507	state2,cn=1	5	startsnp=BovineHD0100010876	endsnp=BovineHD0100010921
chr1:60034616-60260551	numsnp=67	length=225,936	state2,cn=1	5	startsnp=BovineHD0100016971	endsnp=BovineHD0100017031
chr1:70875107-70968244	numsnp=22	length=93,138	state2,cn=1	5	startsnp=BovineHD0100020286	endsnp=BovineHD0100020309
chr1:72115021-72387471	numsnp=42	length=272,451	state2,cn=1	5	startsnp=BovineHD0100020680	endsnp=BovineHD0100020714
chr1:72758347-72931620	numsnp=42	length=173,274	state2,cn=1	5	startsnp=BovineHD0100020841	endsnp=BovineHD0100020881
chr1:76596713-76837310	numsnp=80	length=240,598	state2,cn=1	5	startsnp=BovineHD0100022071	endsnp=BovineHD0100022153
chr1:84617946-84860353	numsnp=54	length=242,408	state2,cn=1	5	startsnp=BovineHD0100024241	endsnp=BovineHD0100024294
chr1:103879978-103931503	numsnp=14	length=51,526	state2,cn=1	5	startsnp=BovineHD0100029621	endsnp=BovineHD0100029633
chr1:127507201-127687035	numsnp=40	length=179,835	state2,cn=1	5	startsnp=BovineHD0100036037	endsnp=BovineHD0100036068
chr1:133527757-133616398	numsnp=22	length=88,642	state2,cn=1	5	startsnp=BovineHD0100038032	endsnp=BovineHD0100038049
chr1:147010912-147066830	numsnp=31	length=55,919	state2,cn=1	5	startsnp=BovineHD0100042491	endsnp=ARS-BFGL-NGS-1705
chr1:157193589-157273077	numsnp=34	length=79,489	state2,cn=1	5	startsnp=BovineHD0100046640	endsnp=BovineHD0100045991
chr2:8788219-9031463	numsnp=69	length=243,245	state2,cn=1	5	startsnp=Hapmap50551-BTA-104382	endsnp=BovineHD0200002615
chr2:9388178-9521997	numsnp=27	length=133,820	state2,cn=1	5	startsnp=BovineHD0200002686	endsnp=Hapmap23397-BTA-133598
chr2:24714894-24889494	numsnp=34	length=174,601	state2,cn=1	5	startsnp=BovineHD0200007107	endsnp=BovineHD0200007153
chr2:31238054-31537917	numsnp=109	length=299,864	state2,cn=1	5	startsnp=BovineHD0200009241	endsnp=BovineHD0200009339
chr2:35193001-35277747	numsnp=19	length=84,747	state2,cn=1	5	startsnp=BovineHD0200010355	endsnp=BovineHD0200010371
chr2:36805443-37085429	numsnp=64	length=279,987	state2,cn=1	5	startsnp=BovineHD0200010796	endsnp=BovineHD0200010861
chr2:47817474-48448951	numsnp=148	length=631,478	state2,cn=1	5	startsnp=BovineHD0200013874	endsnp=BovineHD0200014012
chr2:61708027-61787820	numsnp=40	length=79,794	state2,cn=1	5	startsnp=BovineHD0200017729	endsnp=BovineHD0200017770
chr2:91604872-91668850	numsnp=13	length=63,979	state2,cn=1	5	startsnp=ARS-BFGL-NGS-93026	endsnp=BovineHD0200026061
chr2:97295093-97397636	numsnp=37	length=102,544	state2,cn=1	5	startsnp=BovineHD0200027997	endsnp=BovineHD0200028030
chr2:101874238-102147637	numsnp=69	length=273,400	state2,cn=1	5	startsnp=BovineHD0200029246	endsnp=BovineHD0200029333
chr3:604022-787371	numsnp=45	length=183,350	state2,cn=1	5	startsnp=BovineHD0300000127	endsnp=ARS-BFGL-NGS-67047
chr3:15137638-15320333	numsnp=62	length=182,696	state2,cn=1	5	startsnp=BovineHD4100001870	endsnp=BovineHD0300004992
chr3:29045330-29095368	numsnp=15	length=50,039	state2,cn=1	5	startsnp=BovineHD0300009190	endsnp=BovineHD0300009204
chr3:40511241-40667345	numsnp=55	length=156,105	state2,cn=1	5	startsnp=BovineHD0300012333	endsnp=BovineHD0300012387
chr3:43376774-43537606	numsnp=67	length=160,833	state2,cn=1	5	startsnp=BovineHD0300013191	endsnp=BovineHD0300013262
chr3:62636105-62890030	numsnp=70	length=253,926	state2,cn=1	5	startsnp=BovineHD0300018770	endsnp=BovineHD0300018832
chr3:72197964-72293714	numsnp=19	length=95,751	state2,cn=1	5	startsnp=BovineHD0300021151	endsnp=BovineHD0300021167
chr3:83505232-83667732	numsnp=41	length=162,501	state2,cn=1	5	startsnp=BovineHD0300023896	endsnp=BovineHD0300023929
chr3:94423069-94515232	numsnp=22	length=92,164	state2,cn=1	5	startsnp=BovineHD0300027207	endsnp=BovineHD0300036315
chr3:98358893-98552988	numsnp=77	length=194,096	state2,cn=1	5	startsnp=BovineHD0300028257	endsnp=INRA-437
chr3:120637967-120836801	numsnp=48	length=198,835	state2,cn=1	5	startsnp=BovineHD0300035273	endsnp=BovineHD0300035314
chr3:120883492-121143331	numsnp=73	length=259,840	state2,cn=1	5	startsnp=BovineHD4100002577	endsnp=ARS-BFGL-NGS-2087
chr4:19985853-20120932	numsnp=44	length=135,080	state2,cn=1	5	startsnp=BovineHD0400006005	endsnp=BovineHD0400006044
chr4:36548119-36737492	numsnp=64	length=189,374	state2,cn=1	5	startsnp=BovineHD0400010245	endsnp=BovineHD0400010304
chr4:51318774-51371784	numsnp=12	length=53,011	state2,cn=1	5	startsnp=BovineHD0400014199	endsnp=BovineHD0400014207
chr4:72375370-72513244	numsnp=29	length=137,875	state2,cn=1	5	startsnp=BovineHD0400020051	endsnp=BovineHD0400020079
chr4:78696987-78808735	numsnp=42	length=111,749	state2,cn=1	5	startsnp=BovineHD0400021817	endsnp=BovineHD0400021855
chr4:84055144-84191669	numsnp=26	length=136,526	state2,cn=1	5	startsnp=BovineHD0400023290	endsnp=BovineHD0400023314
chr4:88769527-88883681	numsnp=28	length=114,155	state2,cn=1	5	startsnp=BovineHD0400024582	endsnp=BovineHD0400024606
chr4:89897538-90031427	numsnp=41	length=133,890	state2,cn=1	5	startsnp=BovineHD0400024891	endsnp=BovineHD0400024930
chr4:95900218-95974974	numsnp=21	length=74,757	state2,cn=1	5	startsnp=BovineHD0400036187	endsnp=BovineHD0400026716
chr5:15699275-15752024	numsnp=16	length=52,750	state2,cn=1	5	startsnp=BovineHD0500004633	endsnp=BovineHD0500004647
chr5:40780471-40879690	numsnp=30	length=99,220	state2,cn=1	5	startsnp=BovineHD0500011670	endsnp=BovineHD0500011695
chr5:41990361-42137154	numsnp=30	length=146,794	state2,cn=1	5	startsnp=BovineHD0500011998	endsnp=BovineHD0500035916
chr5:43417275-43490630	numsnp=19	length=73,356	state2,cn=1	5	startsnp=BTB-01477536	endsnp=BovineHD4100003632
chr5:51265925-51515066	numsnp=64	length=249,142	state2,cn=1	5	startsnp=BovineHD0500014753	endsnp=BovineHD0500014818
chr5:76653989-76747494	numsnp=14	length=93,506	state2,cn=1	5	startsnp=BovineHD0500021851	endsnp=BovineHD0500021861
chr5:79159916-79322625	numsnp=33	length=162,710	state2,cn=1	5	startsnp=BovineHD0500022469	endsnp=BovineHD0500022499
chr5:99937939-100129380	numsnp=58	length=191,442	state2,cn=1	5	startsnp=BovineHD0500028597	endsnp=BovineHD0500028662
chr6:33029330-33131396	numsnp=41	length=102,067	state2,cn=1	5	startsnp=BovineHD0600009251	endsnp=BovineHD4100004393
chr6:35520990-35710334	numsnp=54	length=189,345	state2,cn=1	5	startsnp=BovineHD0600009898	endsnp=BovineHD0600009945
chr6:38837159-39023195	numsnp=37	length=186,037	state2,cn=1	5	startsnp=BovineHD4100004577	endsnp=BovineHD4100004588
chr6:56249640-56531151	numsnp=72	length=281,512	state2,cn=1	5	startsnp=BovineHD0600015394	endsnp=BovineHD0600015460
chr6:72540759-72782236	numsnp=74	length=241,478	state2,cn=1	5	startsnp=BovineHD0600020146	endsnp=BovineHD0600020215
chr6:89935963-90109989	numsnp=36	length=174,027	state2,cn=1	5	startsnp=BovineHD0600024652	endsnp=BovineHD0600024686
chr6:109072635-109844160	numsnp=151	length=771,526	state2,cn=1	5	startsnp=BovineHD0600030747	endsnp=BovineHD0600030892
chr7:9606059-9708960	numsnp=13	length=102,902	state2,cn=1	5	startsnp=BovineHD0700033501	endsnp=BovineHD0700002515
chr7:9873696-10005283	numsnp=10	length=131,588	state2,cn=1	5	startsnp=BovineHD0700002587	endsnp=BovineHD0700033515
chr7:11268620-11345336	numsnp=13	length=76,717	state2,cn=1	5	startsnp=BovineHD4100005738	endsnp=BovineHD0700033558
chr7:24107045-24286099	numsnp=54	length=179,055	state2,cn=1	5	startsnp=BovineHD0700006603	endsnp=BovineHD0700006654
chr7:38967158-39123656	numsnp=61	length=156,499	state2,cn=1	5	startsnp=BTB-01364730	endsnp=BovineHD0700011350
chr7:42528849-42974887	numsnp=100	length=446,039	state2,cn=1	5	startsnp=BovineHD0700012384	endsnp=BovineHD0700012479
chr7:43228786-43330896	numsnp=26	length=102,111	state2,cn=1	5	startsnp=BovineHD0700012542	endsnp=BovineHD0700012567
chr7:47770235-47930150	numsnp=45	length=159,916	state2,cn=1	5	startsnp=BovineHD0700013815	endsnp=BovineHD0700013858
chr7:53536229-53744017	numsnp=88	length=207,789	state2,cn=1	5	startsnp=BovineHD0700015401	endsnp=BovineHD0700015488
chr7:109968017-110054712	numsnp=17	length=86,696	state2,cn=1	5	startsnp=BovineHD0700032101	endsnp=BovineHD0700034065
chr8:24943413-25026795	numsnp=30	length=83,383	state2,cn=1	5	startsnp=BovineHD0800007541	endsnp=BovineHD0800007568
chr8:26955095-27178949	numsnp=40	length=223,855	state2,cn=1	5	startsnp=BovineHD0800008141	endsnp=BovineHD0800008180
chr8:28603486-28705702	numsnp=35	length=102,217	state2,cn=1	5	startsnp=BovineHD0800008647	endsnp=BovineHD0800008679
chr8:31694632-31745152	numsnp=16	length=50,521	state2,cn=1	5	startsnp=BovineHD0800009587	endsnp=BovineHD0800009601
chr8:32326466-32450361	numsnp=29	length=123,896	state2,cn=1	5	startsnp=BovineHD0800009748	endsnp=BTB-00258020
chr8:41479170-41531951	numsnp=20	length=52,782	state2,cn=1	5	startsnp=BovineHD0800012347	endsnp=BovineHD0800012365
chr8:53486832-53647856	numsnp=34	length=161,025	state2,cn=1	5	startsnp=BovineHD0800016070	endsnp=BovineHD0800016106
chr8:61634559-61848642	numsnp=60	length=214,084	state2,cn=1	5	startsnp=BovineHD0800018424	endsnp=BovineHD0800018481
chr8:72420836-72523721	numsnp=32	length=102,886	state2,cn=1	5	startsnp=BovineHD0800021768	endsnp=BovineHD0800021798
chr8:87998405-88087326	numsnp=24	length=88,922	state2,cn=1	5	startsnp=BovineHD0800026107	endsnp=BovineHD0800026129
chr8:94460889-94693789	numsnp=67	length=232,901	state2,cn=1	5	startsnp=ARS-BFGL-NGS-50038	endsnp=BovineHD0800028028
chr9:31246546-31477198	numsnp=63	length=230,653	state2,cn=1	5	startsnp=BovineHD0900008501	endsnp=BovineHD0900008562
chr9:36574394-36677939	numsnp=56	length=103,546	state2,cn=1	5	startsnp=BovineHD0900010062	endsnp=BovineHD0900010119
chr9:50916350-51080568	numsnp=43	length=164,219	state2,cn=1	5	startsnp=BovineHD0900014035	endsnp=BovineHD0900014074
chr9:79095902-79218471	numsnp=28	length=122,570	state2,cn=1	5	startsnp=BovineHD0900022001	endsnp=BovineHD0900022028
chr9:79552025-79816568	numsnp=64	length=264,544	state2,cn=1	5	startsnp=BovineHD0900022091	endsnp=BovineHD0900022158
chr9:99626724-99722691	numsnp=40	length=95,968	state2,cn=1	5	startsnp=BovineHD0900028814	endsnp=BovineHD0900028853
chr10:14286516-14383028	numsnp=26	length=96,513	state2,cn=1	5	startsnp=BovineHD1000004770	endsnp=BovineHD1000004794
chr10:18767514-18878078	numsnp=20	length=110,565	state2,cn=1	5	startsnp=BovineHD1000006214	endsnp=BovineHD1000006231
chr10:22738750-23127194	numsnp=37	length=388,445	state2,cn=1	5	startsnp=BovineHD1000007426	endsnp=BovineHD1000007604
chr10:38279020-38439355	numsnp=35	length=160,336	state2,cn=1	5	startsnp=BovineHD1000011856	endsnp=BovineHD1000011888
chr10:43377984-43602769	numsnp=38	length=224,786	state2,cn=1	5	startsnp=BovineHD1000013060	endsnp=BovineHD1000031386
chr10:51305855-51567559	numsnp=52	length=261,705	state2,cn=1	5	startsnp=BovineHD1000015398	endsnp=BovineHD1000015445
chr10:68231262-68334411	numsnp=36	length=103,150	state2,cn=1	5	startsnp=BovineHD1000019553	endsnp=BovineHD1000019588
chr10:70750438-70989965	numsnp=66	length=239,528	state2,cn=1	5	startsnp=BovineHD1000020291	endsnp=BovineHD1000020357
chr10:78911500-79312084	numsnp=82	length=400,585	state2,cn=1	5	startsnp=BovineHD1000022589	endsnp=BovineHD1000022668
chr11:15003611-15140536	numsnp=26	length=136,926	state2,cn=1	5	startsnp=BovineHD1100031531	endsnp=BovineHD1100004842
chr11:21559452-21656279	numsnp=44	length=96,828	state2,cn=1	5	startsnp=BovineHD1100006467	endsnp=BovineHD1100006509
chr11:30449065-30558447	numsnp=26	length=109,383	state2,cn=1	5	startsnp=Hapmap27192-BTA-152811	endsnp=BovineHD4100008688
chr11:33971454-34229770	numsnp=49	length=258,317	state2,cn=1	5	startsnp=BovineHD1100010164	endsnp=BovineHD1100010214
chr11:58267632-58419387	numsnp=35	length=151,756	state2,cn=1	5	startsnp=BovineHD1100016769	endsnp=ARS-BFGL-BAC-11747
chr11:59809617-59953372	numsnp=27	length=143,756	state2,cn=1	5	startsnp=BovineHD1100017086	endsnp=BovineHD1100017109
chr11:70865913-70986341	numsnp=30	length=120,429	state2,cn=1	5	startsnp=BovineHD1100020310	endsnp=BovineHD1100020339
chr11:75098286-75238305	numsnp=53	length=140,020	state2,cn=1	5	startsnp=BovineHD1100021397	endsnp=BovineHD1100021450
chr11:103644879-104094452	numsnp=116	length=449,574	state2,cn=1	5	startsnp=BovineHD1100030159	endsnp=BovineHD1100030258
chr11:106196578-106459392	numsnp=78	length=262,815	state2,cn=1	5	startsnp=BovineHD1100030807	endsnp=BovineHD1100030884
chr12:60218974-60287659	numsnp=28	length=68,686	state2,cn=1	5	startsnp=BovineHD1200016508	endsnp=BovineHD1200016536
chr12:65026929-65131442	numsnp=38	length=104,514	state2,cn=1	5	startsnp=BovineHD1200017800	endsnp=BTB-01283856
chr12:84126694-84260243	numsnp=43	length=133,550	state2,cn=1	5	startsnp=BovineHD1200024380	endsnp=BovineHD1200024419
chr12:90602848-90725625	numsnp=31	length=122,778	state2,cn=1	5	startsnp=BovineHD1200026560	endsnp=BovineHD1200026586
chr13:18056702-18179388	numsnp=46	length=122,687	state2,cn=1	5	startsnp=BovineHD1300005140	endsnp=BovineHD1300005182
chr13:20352649-20615821	numsnp=50	length=263,173	state2,cn=1	5	startsnp=BovineHD1300005925	endsnp=BTB-01233700
chr13:20965563-21042957	numsnp=39	length=77,395	state2,cn=1	5	startsnp=BovineHD1300006064	endsnp=BovineHD1300024548
chr13:36782813-36833775	numsnp=18	length=50,963	state2,cn=1	5	startsnp=Hapmap25918-BTA-163236	endsnp=BovineHD1300010660
chr14:2006872-2230450	numsnp=50	length=223,579	state2,cn=1	5	startsnp=BovineHD1400000273	endsnp=BovineHD4100010528
chr14:27179539-27380992	numsnp=55	length=201,454	state2,cn=1	5	startsnp=BovineHD4100011369	endsnp=Hapmap26621-BTC-072953
chr14:40430406-40571538	numsnp=34	length=141,133	state2,cn=1	5	startsnp=BTB-01985013	endsnp=BTA-95925-no-rs
chr14:40832903-40991913	numsnp=58	length=159,011	state2,cn=1	5	startsnp=BovineHD1400011680	endsnp=BovineHD1400011732
chr14:42662145-42973247	numsnp=83	length=311,103	state2,cn=1	5	startsnp=BovineHD1400012139	endsnp=BovineHD1400012216
chr14:44047994-44126252	numsnp=28	length=78,259	state2,cn=1	5	startsnp=BovineHD1400012467	endsnp=Hapmap43697-BTA-82657
chr14:58227330-58438290	numsnp=43	length=210,961	state2,cn=1	5	startsnp=BovineHD1400016181	endsnp=BovineHD1400016222
chr14:59996266-60079018	numsnp=27	length=82,753	state2,cn=1	5	startsnp=BovineHD1400016625	endsnp=BovineHD1400016650
chr14:62627737-62710391	numsnp=27	length=82,655	state2,cn=1	5	startsnp=BovineHD1400017419	endsnp=BovineHD1400017443
chr14:62782571-62935267	numsnp=31	length=152,697	state2,cn=1	5	startsnp=BovineHD1400017458	endsnp=BovineHD1400017486
chr14:66819485-67489095	numsnp=161	length=669,611	state2,cn=1	5	startsnp=ARS-BFGL-NGS-115036	endsnp=BovineHD1400018846
chr14:71793738-71928766	numsnp=38	length=135,029	state2,cn=1	5	startsnp=ARS-BFGL-NGS-60065	endsnp=BovineHD1400020157
chr14:83547949-83615008	numsnp=33	length=67,060	state2,cn=1	5	startsnp=BovineHD1400023602	endsnp=BovineHD1400023633
chr15:10510915-10746942	numsnp=49	length=236,028	state2,cn=1	5	startsnp=BovineHD1500002735	endsnp=BovineHD1500002783
chr15:11393603-11534530	numsnp=56	length=140,928	state2,cn=1	5	startsnp=BovineHD4100011789	endsnp=BovineHD1500002942
chr15:20645813-20762546	numsnp=46	length=116,734	state2,cn=1	5	startsnp=BovineHD1500005236	endsnp=BovineHD1500005280
chr15:43195359-43308530	numsnp=29	length=113,172	state2,cn=1	5	startsnp=BovineHD1500012013	endsnp=Hapmap46538-BTA-88332
chr15:43791258-43879194	numsnp=29	length=87,937	state2,cn=1	5	startsnp=BovineHD1500012158	endsnp=BovineHD1500012183
chr15:47946424-48047397	numsnp=12	length=100,974	state2,cn=1	5	startsnp=BovineHD1500025806	endsnp=BovineHD1500013779
chr15:64314134-64432293	numsnp=35	length=118,160	state2,cn=1	5	startsnp=BovineHD1500018415	endsnp=BovineHD1500025940
chr16:5670600-5812501	numsnp=34	length=141,902	state2,cn=1	5	startsnp=BovineHD1600001602	endsnp=BovineHD1600023912
chr16:8419721-8486467	numsnp=10	length=66,747	state2,cn=1	5	startsnp=BovineHD1600002379	endsnp=BTA-88251-no-rs
chr16:26963625-27154383	numsnp=77	length=190,759	state2,cn=1	5	startsnp=BovineHD1600007442	endsnp=BovineHD1600007515
chr16:28916833-29019715	numsnp=44	length=102,883	state2,cn=1	5	startsnp=BovineHD1600008121	endsnp=BovineHD1600008162
chr16:31162715-31255320	numsnp=22	length=92,606	state2,cn=1	5	startsnp=Hapmap50900-BTA-16300	endsnp=BTB-01634281
chr16:38371856-38424448	numsnp=18	length=52,593	state2,cn=1	5	startsnp=BovineHD1600011020	endsnp=BovineHD1600011036
chr16:62689142-62742829	numsnp=11	length=53,688	state2,cn=1	5	startsnp=BovineHD1600017579	endsnp=BovineHD1600017586
chr16:68900268-69046300	numsnp=76	length=146,033	state2,cn=1	5	startsnp=BovineHD1600019515	endsnp=BovineHD1600019591
chr16:69234293-69308140	numsnp=22	length=73,848	state2,cn=1	5	startsnp=BovineHD1600019655	endsnp=BovineHD1600019676
chr16:70814352-70924028	numsnp=24	length=109,677	state2,cn=1	5	startsnp=BovineHD1600020126	endsnp=BovineHD1600020149
chr16:71083442-71180683	numsnp=26	length=97,242	state2,cn=1	5	startsnp=BovineHD1600020182	endsnp=BovineHD1600020209
chr16:78395279-78528854	numsnp=60	length=133,576	state2,cn=1	5	startsnp=BovineHD1600022799	endsnp=BovineHD1600022855
chr17:20704416-20965875	numsnp=77	length=261,460	state2,cn=1	5	startsnp=BovineHD1700005993	endsnp=BovineHD1700006062
chr17:25868663-25929043	numsnp=15	length=60,381	state2,cn=1	5	startsnp=BovineHD1700007290	endsnp=BovineHD1700007304
chr17:26101559-26166694	numsnp=23	length=65,136	state2,cn=1	5	startsnp=BovineHD1700007357	endsnp=BovineHD1700007390
chr17:30039023-30313751	numsnp=47	length=274,729	state2,cn=1	5	startsnp=BovineHD1700008484	endsnp=BovineHD1700008534
chr17:73354100-73516198	numsnp=49	length=162,099	state2,cn=1	5	startsnp=BovineHD1700021435	endsnp=BovineHD1700021477
chr17:73569170-73858134	numsnp=96	length=288,965	state2,cn=1	5	startsnp=BovineHD1700021492	endsnp=BovineHD1700021585
chr17:74794960-75148791	numsnp=63	length=353,832	state2,cn=1	5	startsnp=BovineHD1700021845	endsnp=BovineHD1700022147
chr18:21686981-21872521	numsnp=35	length=185,541	state2,cn=1	5	startsnp=BovineHD1800019581	endsnp=BovineHD1800006717
chr18:47083384-47282559	numsnp=61	length=199,176	state2,cn=1	5	startsnp=BovineHD1800013886	endsnp=BovineHD1800013944
chr19:12860683-13002657	numsnp=38	length=141,975	state2,cn=1	5	startsnp=BovineHD4100013944	endsnp=BovineHD1900003435
chr19:26778399-26882895	numsnp=27	length=104,497	state2,cn=1	5	startsnp=ARS-BFGL-NGS-119242	endsnp=BovineHD1900008014
chr19:41505900-41627866	numsnp=44	length=121,967	state2,cn=1	5	startsnp=BovineHD1900011823	endsnp=BovineHD1900011863
chr19:48181378-48305042	numsnp=31	length=123,665	state2,cn=1	5	startsnp=BovineHD1900013391	endsnp=BovineHD1900013418
chr19:63820023-63912238	numsnp=33	length=92,216	state2,cn=1	5	startsnp=BovineHD1900018484	endsnp=BovineHD1900018521
chr20:8475414-8768838	numsnp=62	length=293,425	state2,cn=1	5	startsnp=BTB-00771346	endsnp=BovineHD2000002766
chr20:60599638-60706699	numsnp=31	length=107,062	state2,cn=1	5	startsnp=BovineHD2000017009	endsnp=BovineHD2000017039
chr21:51404941-51469429	numsnp=17	length=64,489	state2,cn=1	5	startsnp=BovineHD2100014785	endsnp=BovineHD2100014801
chr21:53450276-53653708	numsnp=39	length=203,433	state2,cn=1	5	startsnp=BovineHD2100015324	endsnp=BovineHD2100015356
chr21:70221263-70449176	numsnp=85	length=227,914	state2,cn=1	5	startsnp=BovineHD2100020518	endsnp=BovineHD2100020597
chr21:70701216-70896927	numsnp=58	length=195,712	state2,cn=1	5	startsnp=BovineHD2100020703	endsnp=BovineHD2100020748
chr22:44160849-44355284	numsnp=43	length=194,436	state2,cn=1	5	startsnp=BovineHD2200012779	endsnp=BovineHD2200012817
chr22:59979559-60220816	numsnp=79	length=241,258	state2,cn=1	5	startsnp=BovineHD2200017404	endsnp=BovineHD2200017476
chr22:60399564-60527377	numsnp=51	length=127,814	state2,cn=1	5	startsnp=BovineHD2200017568	endsnp=BovineHD2200017616
chr22:60855857-61005174	numsnp=48	length=149,318	state2,cn=1	5	startsnp=BovineHD2200017726	endsnp=BovineHD2200017767
chr23:16298875-16368660	numsnp=20	length=69,786	state2,cn=1	5	startsnp=BovineHD2300004188	endsnp=BovineHD2300004202
chr23:51830401-51977468	numsnp=42	length=147,068	state2,cn=1	5	startsnp=BovineHD2300015064	endsnp=BovineHD2300015099
chr24:41875646-41957671	numsnp=20	length=82,026	state2,cn=1	5	startsnp=BovineHD2400011623	endsnp=BovineHD2400011641
chr25:271849-668542	numsnp=103	length=396,694	state2,cn=1	5	startsnp=BovineHD2500000048	endsnp=BovineHD4100016796
chr25:767659-1431881	numsnp=167	length=664,223	state2,cn=1	5	startsnp=BovineHD2500000181	endsnp=Hapmap33541-BTC-016426
chr25:1712523-2011350	numsnp=74	length=298,828	state2,cn=1	5	startsnp=ARS-BFGL-NGS-15062	endsnp=BovineHD2500000406
chr25:9214045-9270380	numsnp=11	length=56,336	state2,cn=1	5	startsnp=BovineHD2500002453	endsnp=BovineHD2500002463
chr25:19373377-19581064	numsnp=42	length=207,688	state2,cn=1	5	startsnp=BovineHD2500005390	endsnp=ARS-BFGL-NGS-31542
chr25:41129839-41374004	numsnp=71	length=244,166	state2,cn=1	5	startsnp=BovineHD4100017542	endsnp=BovineHD4100017560
chr25:41729070-42211658	numsnp=134	length=482,589	state2,cn=1	5	startsnp=BovineHD2500011747	endsnp=BovineHD4100017601
chr25:42532278-42740703	numsnp=59	length=208,426	state2,cn=1	5	startsnp=BovineHD2500011902	endsnp=BovineHD2500012250
chr26:20561955-20638570	numsnp=18	length=76,616	state2,cn=1	5	startsnp=BovineHD2600005334	endsnp=BovineHD2600005347
chr26:50842832-51291371	numsnp=112	length=448,540	state2,cn=1	5	startsnp=ARS-BFGL-NGS-948	endsnp=BovineHD2600014810
chr26:51469054-51680135	numsnp=73	length=211,082	state2,cn=1	5	startsnp=BovineHD2600014875	endsnp=ARS-BFGL-NGS-17431
chr28:19549475-19674311	numsnp=39	length=124,837	state2,cn=1	5	startsnp=BovineHD2800005295	endsnp=BovineHD2800005334
chr28:24885275-25219425	numsnp=60	length=334,151	state2,cn=1	5	startsnp=BovineHD2800006444	endsnp=BovineHD2800006494
chr29:49294582-49554813	numsnp=52	length=260,232	state2,cn=1	5	startsnp=BovineHD2900014539	endsnp=BovineHD2900014591
chr29:50546936-51174708	numsnp=145	length=627,773	state2,cn=1	5	startsnp=BovineHD2900014767	endsnp=BovineHD2900014907
chr12:70645065-71274536	numsnp=28	length=629,472	state5,cn=3	5	startsnp=BovineHD1200019402	endsnp=BovineHD1200019530
chr14:62713422-62769117	numsnp=13	length=55,696	state5,cn=3	5	startsnp=BovineHD1400017444	endsnp=BovineHD1400017455
chr29:38567737-38711384	numsnp=28	length=143,648	state5,cn=3	5	startsnp=BovineHD2900011663	endsnp=BovineHD2900011714
chr6:6502610-6902973	numsnp=78	length=400,364	state6,cn=4	5	startsnp=BovineHD0600001420	endsnp=BovineHD0600001493
chr1:93730576-93819471	numsnp=10	length=88,896	state1,cn=0	6	startsnp=BovineHD0100047110	endsnp=BovineHD0100026605
chr5:102773939-102932410	numsnp=63	length=158,472	state1,cn=0	6	startsnp=BovineHD0500029439	endsnp=BovineHD0500029507
chr12:32054331-32162911	numsnp=13	length=108,581	state1,cn=0	6	startsnp=BovineHD1200009422	endsnp=BovineHD1200009451
chr12:70392108-70620665	numsnp=24	length=228,558	state1,cn=0	6	startsnp=BovineHD1200019356	endsnp=BovineHD1200019397
chr12:72511101-72882991	numsnp=79	length=371,891	state1,cn=0	6	startsnp=BovineHD1200020004	endsnp=BovineHD1200020124
chr15:47873132-47936886	numsnp=15	length=63,755	state1,cn=0	6	startsnp=BovineHD1500013731	endsnp=BTB-01881715
chr15:80090566-80529996	numsnp=49	length=439,431	state1,cn=0	6	startsnp=BovineHD1500023358	endsnp=BovineHD1500026023
chr16:5676289-5789669	numsnp=27	length=113,381	state1,cn=0	6	startsnp=BovineHD1600001604	endsnp=BovineHD1600001649
chr1:15796320-15938246	numsnp=35	length=141,927	state2,cn=1	6	startsnp=ARS-BFGL-NGS-109692	endsnp=BovineHD0100004856
chr1:20033381-20093504	numsnp=23	length=60,124	state2,cn=1	6	startsnp=BovineHD0100005949	endsnp=BovineHD0100005969
chr1:20670704-20831246	numsnp=59	length=160,543	state2,cn=1	6	startsnp=BovineHD0100006120	endsnp=BovineHD0100006174
chr1:27390245-27486654	numsnp=32	length=96,410	state2,cn=1	6	startsnp=BovineHD0100008162	endsnp=BovineHD0100008191
chr1:27972969-28135135	numsnp=46	length=162,167	state2,cn=1	6	startsnp=BovineHD0100008321	endsnp=BovineHD0100008364
chr1:37808819-37945685	numsnp=67	length=136,867	state2,cn=1	6	startsnp=BovineHD0100010876	endsnp=BovineHD0100010943
chr1:48306188-48529650	numsnp=66	length=223,463	state2,cn=1	6	startsnp=BovineHD0100013652	endsnp=BovineHD0100013711
chr1:60027340-60260551	numsnp=68	length=233,212	state2,cn=1	6	startsnp=BovineHD0100016970	endsnp=BovineHD0100017031
chr1:66217192-66494267	numsnp=73	length=277,076	state2,cn=1	6	startsnp=BovineHD0100018681	endsnp=BovineHD0100018748
chr1:70507176-70641645	numsnp=29	length=134,470	state2,cn=1	6	startsnp=BovineHD0100020171	endsnp=BovineHD0100020198
chr1:70875107-70968244	numsnp=22	length=93,138	state2,cn=1	6	startsnp=BovineHD0100020286	endsnp=BovineHD0100020309
chr1:72115021-72387471	numsnp=42	length=272,451	state2,cn=1	6	startsnp=BovineHD0100020680	endsnp=BovineHD0100020714
chr1:72758347-72931620	numsnp=42	length=173,274	state2,cn=1	6	startsnp=BovineHD0100020841	endsnp=BovineHD0100020881
chr1:76497705-76755599	numsnp=84	length=257,895	state2,cn=1	6	startsnp=BovineHD0100022050	endsnp=BovineHD0100022133
chr1:84617946-84961332	numsnp=85	length=343,387	state2,cn=1	6	startsnp=BovineHD0100024241	endsnp=BovineHD0100024326
chr1:107771771-108031239	numsnp=59	length=259,469	state2,cn=1	6	startsnp=BovineHD0100030495	endsnp=Hapmap38658-BTA-121982
chr1:110012664-110269954	numsnp=50	length=257,291	state2,cn=1	6	startsnp=BovineHD0100031172	endsnp=BovineHD0100031225
chr1:127491286-127687035	numsnp=43	length=195,750	state2,cn=1	6	startsnp=BTB-00056151	endsnp=BovineHD0100036068
chr1:131409580-131495551	numsnp=29	length=85,972	state2,cn=1	6	startsnp=BovineHD0100037357	endsnp=BovineHD0100037383
chr1:136844018-136918482	numsnp=27	length=74,465	state2,cn=1	6	startsnp=BovineHD0100039010	endsnp=BovineHD0100039037
chr1:146979606-147107559	numsnp=58	length=127,954	state2,cn=1	6	startsnp=BovineHD0100042471	endsnp=BovineHD4100000845
chr1:147278577-147434939	numsnp=68	length=156,363	state2,cn=1	6	startsnp=BovineHD0100042573	endsnp=BovineHD0100042641
chr1:157138014-157273077	numsnp=47	length=135,064	state2,cn=1	6	startsnp=BovineHD0100046863	endsnp=BovineHD0100045991
chr2:24714894-24891260	numsnp=35	length=176,367	state2,cn=1	6	startsnp=BovineHD0200007107	endsnp=BovineHD0200007154
chr2:31235955-31535313	numsnp=111	length=299,359	state2,cn=1	6	startsnp=BovineHD0200009238	endsnp=BovineHD0200009338
chr2:36655521-37172535	numsnp=111	length=517,015	state2,cn=1	6	startsnp=ARS-BFGL-NGS-102089	endsnp=BovineHD0200010877
chr2:47817474-48448951	numsnp=148	length=631,478	state2,cn=1	6	startsnp=BovineHD0200013874	endsnp=BovineHD0200014012
chr2:50733541-50969735	numsnp=61	length=236,195	state2,cn=1	6	startsnp=BovineHD0200014568	endsnp=BovineHD0200014625
chr2:51161504-51397309	numsnp=65	length=235,806	state2,cn=1	6	startsnp=BovineHD0200014670	endsnp=BovineHD0200014735
chr2:53954233-54237423	numsnp=61	length=283,191	state2,cn=1	6	startsnp=BovineHD0200015368	endsnp=ARS-BFGL-NGS-34148
chr2:61708027-61871722	numsnp=71	length=163,696	state2,cn=1	6	startsnp=BovineHD0200017729	endsnp=BovineHD0200017798
chr2:61989898-62081355	numsnp=59	length=91,458	state2,cn=1	6	startsnp=BovineHD0200017840	endsnp=BovineHD0200017899
chr2:82088872-82357273	numsnp=79	length=268,402	state2,cn=1	6	startsnp=BovineHD0200023525	endsnp=BovineHD0200023607
chr2:91623353-92154830	numsnp=114	length=531,478	state2,cn=1	6	startsnp=BovineHD0200026050	endsnp=BovineHD0200026167
chr2:100722180-101069137	numsnp=84	length=346,958	state2,cn=1	6	startsnp=BovineHD0200028914	endsnp=BovineHD0200028999
chr2:101860421-102147637	numsnp=75	length=287,217	state2,cn=1	6	startsnp=BovineHD0200029238	endsnp=BovineHD0200029333
chr3:604022-797529	numsnp=47	length=193,508	state2,cn=1	6	startsnp=BovineHD0300000127	endsnp=BovineHD0300000172
chr3:11192485-11273957	numsnp=55	length=81,473	state2,cn=1	6	startsnp=BovineHD0300003684	endsnp=BovineHD0300003741
chr3:15134238-15320333	numsnp=63	length=186,096	state2,cn=1	6	startsnp=BovineHD0300004928	endsnp=BovineHD0300004992
chr3:29045330-29111048	numsnp=18	length=65,719	state2,cn=1	6	startsnp=BovineHD0300009190	endsnp=BovineHD0300009207
chr3:40511241-40667345	numsnp=55	length=156,105	state2,cn=1	6	startsnp=BovineHD0300012333	endsnp=BovineHD0300012387
chr3:43376774-43537606	numsnp=67	length=160,833	state2,cn=1	6	startsnp=BovineHD0300013191	endsnp=BovineHD0300013262
chr3:45617303-45786008	numsnp=50	length=168,706	state2,cn=1	6	startsnp=BovineHD0300013900	endsnp=BovineHD0300013946
chr3:50925969-51041858	numsnp=25	length=115,890	state2,cn=1	6	startsnp=BovineHD0300015440	endsnp=BovineHD0300015463
chr3:51236967-51574237	numsnp=103	length=337,271	state2,cn=1	6	startsnp=BovineHD0300015505	endsnp=BovineHD0300015602
chr3:52415820-52559046	numsnp=44	length=143,227	state2,cn=1	6	startsnp=BovineHD0300015824	endsnp=BovineHD0300015871
chr3:57165102-57327809	numsnp=41	length=162,708	state2,cn=1	6	startsnp=BovineHD0300017238	endsnp=INRA-337
chr3:60108292-60453229	numsnp=132	length=344,938	state2,cn=1	6	startsnp=BovineHD0300018020	endsnp=BovineHD0300018148
chr3:62636105-62890030	numsnp=70	length=253,926	state2,cn=1	6	startsnp=BovineHD0300018770	endsnp=BovineHD0300018832
chr3:67183547-67338055	numsnp=41	length=154,509	state2,cn=1	6	startsnp=BovineHD0300019877	endsnp=BovineHD4100002188
chr3:78728025-78837660	numsnp=32	length=109,636	state2,cn=1	6	startsnp=BovineHD0300022694	endsnp=BovineHD0300022727
chr3:79670682-79765949	numsnp=32	length=95,268	state2,cn=1	6	startsnp=BovineHD0300022959	endsnp=BovineHD0300022989
chr3:83491965-83736926	numsnp=53	length=244,962	state2,cn=1	6	startsnp=BovineHD0300023894	endsnp=BovineHD0300023941
chr3:94416488-94515232	numsnp=24	length=98,745	state2,cn=1	6	startsnp=BovineHD0300027205	endsnp=BovineHD0300036315
chr3:96227150-96344663	numsnp=33	length=117,514	state2,cn=1	6	startsnp=BovineHD0300027589	endsnp=BovineHD0300027620
chr3:98358893-98558041	numsnp=79	length=199,149	state2,cn=1	6	startsnp=BovineHD0300028257	endsnp=BovineHD0300028333
chr3:118071660-118230562	numsnp=44	length=158,903	state2,cn=1	6	startsnp=BovineHD0300034431	endsnp=BovineHD0300034469
chr3:118619968-118719398	numsnp=42	length=99,431	state2,cn=1	6	startsnp=BovineHD0300034596	endsnp=BovineHD0300034635
chr3:120556310-121143331	numsnp=155	length=587,022	state2,cn=1	6	startsnp=BovineHD0300035251	endsnp=ARS-BFGL-NGS-2087
chr4:25814270-25913130	numsnp=30	length=98,861	state2,cn=1	6	startsnp=BovineHD0400007534	endsnp=Hapmap50554-BTA-107048
chr4:43690858-43892016	numsnp=37	length=201,159	state2,cn=1	6	startsnp=BovineHD0400011960	endsnp=BovineHD0400011995
chr4:48672797-48911944	numsnp=51	length=239,148	state2,cn=1	6	startsnp=BovineHD0400013379	endsnp=BovineHD0400013427
chr4:51241661-51371784	numsnp=26	length=130,124	state2,cn=1	6	startsnp=BovineHD0400014186	endsnp=BovineHD0400014207
chr4:63874678-64044409	numsnp=42	length=169,732	state2,cn=1	6	startsnp=BovineHD0400035466	endsnp=BovineHD0400017529
chr4:72375370-72513244	numsnp=29	length=137,875	state2,cn=1	6	startsnp=BovineHD0400020051	endsnp=BovineHD0400020079
chr4:78652494-78810039	numsnp=50	length=157,546	state2,cn=1	6	startsnp=BovineHD0400021810	endsnp=BovineHD0400021856
chr4:84055144-84241119	numsnp=34	length=185,976	state2,cn=1	6	startsnp=BovineHD0400023290	endsnp=BovineHD0400023322
chr4:88769527-88837310	numsnp=20	length=67,784	state2,cn=1	6	startsnp=BovineHD0400024582	endsnp=BovineHD0400024598
chr4:89879613-90123550	numsnp=85	length=243,938	state2,cn=1	6	startsnp=BTA-119205-no-rs	endsnp=BovineHD0400024967
chr5:3984081-4065590	numsnp=25	length=81,510	state2,cn=1	6	startsnp=BovineHD0500000998	endsnp=BovineHD0500001022
chr5:13427248-13562373	numsnp=41	length=135,126	state2,cn=1	6	startsnp=BovineHD0500035808	endsnp=BovineHD0500004097
chr5:14710528-14802322	numsnp=24	length=91,795	state2,cn=1	6	startsnp=BovineHD0500004350	endsnp=BTB-01113127
chr5:15699275-15752024	numsnp=16	length=52,750	state2,cn=1	6	startsnp=BovineHD0500004633	endsnp=BovineHD0500004647
chr5:40780471-40879690	numsnp=30	length=99,220	state2,cn=1	6	startsnp=BovineHD0500011670	endsnp=BovineHD0500011695
chr5:41601867-41810488	numsnp=55	length=208,622	state2,cn=1	6	startsnp=Hapmap38299-BTA-26131	endsnp=BovineHD0500011922
chr5:41990361-42129108	numsnp=29	length=138,748	state2,cn=1	6	startsnp=BovineHD0500011998	endsnp=BovineHD0500012029
chr5:43417275-43490630	numsnp=19	length=73,356	state2,cn=1	6	startsnp=BTB-01477536	endsnp=BovineHD4100003632
chr5:51206980-51515066	numsnp=81	length=308,087	state2,cn=1	6	startsnp=BovineHD0500014736	endsnp=BovineHD0500014818
chr5:59685344-59884984	numsnp=68	length=199,641	state2,cn=1	6	startsnp=BovineHD0500016703	endsnp=BovineHD0500016775
chr5:60441433-60535758	numsnp=30	length=94,326	state2,cn=1	6	startsnp=BovineHD0500016905	endsnp=BovineHD4100003720
chr5:76582910-76758621	numsnp=23	length=175,712	state2,cn=1	6	startsnp=BovineHD0500021845	endsnp=BovineHD0500021862
chr5:79159916-79322625	numsnp=33	length=162,710	state2,cn=1	6	startsnp=BovineHD0500022469	endsnp=BovineHD0500022499
chr5:80534213-80661927	numsnp=32	length=127,715	state2,cn=1	6	startsnp=BovineHD0500022824	endsnp=BovineHD0500022855
chr5:81172194-81454655	numsnp=59	length=282,462	state2,cn=1	6	startsnp=BovineHD0500022983	endsnp=BovineHD0500023044
chr5:86575839-86966299	numsnp=144	length=390,461	state2,cn=1	6	startsnp=BovineHD0500024508	endsnp=BovineHD0500024639
chr5:117356476-117524110	numsnp=26	length=167,635	state2,cn=1	6	startsnp=BovineHD0500034093	endsnp=BovineHD0500034144
chr6:20106902-20259340	numsnp=64	length=152,439	state2,cn=1	6	startsnp=BovineHD0600005527	endsnp=BovineHD0600005589
chr6:27560056-27656754	numsnp=32	length=96,699	state2,cn=1	6	startsnp=BovineHD0600007613	endsnp=BovineHD0600007645
chr6:31701568-31950845	numsnp=62	length=249,278	state2,cn=1	6	startsnp=BTA-12156-rs29024115	endsnp=BovineHD0600008947
chr6:32823175-33417084	numsnp=209	length=593,910	state2,cn=1	6	startsnp=BovineHD4100004363	endsnp=BovineHD0600009334
chr6:35474499-35696537	numsnp=74	length=222,039	state2,cn=1	6	startsnp=BovineHD0600009876	endsnp=BovineHD0600009943
chr6:38825835-39037376	numsnp=45	length=211,542	state2,cn=1	6	startsnp=Hapmap27083-BTC-041166	endsnp=BovineHD0600010777
chr6:56226510-56499762	numsnp=75	length=273,253	state2,cn=1	6	startsnp=BovineHD0600015385	endsnp=BovineHD0600015453
chr6:72540759-72607087	numsnp=21	length=66,329	state2,cn=1	6	startsnp=BovineHD0600020146	endsnp=BovineHD0600020164
chr6:84977346-85205890	numsnp=69	length=228,545	state2,cn=1	6	startsnp=BovineHD0600023369	endsnp=BovineHD0600023439
chr6:109019350-109496453	numsnp=107	length=477,104	state2,cn=1	6	startsnp=BovineHD0600030730	endsnp=ARS-BFGL-NGS-4870
chr6:118916646-119034243	numsnp=38	length=117,598	state2,cn=1	6	startsnp=BovineHD0600034021	endsnp=BovineHD0600034054
chr7:24094310-24286099	numsnp=55	length=191,790	state2,cn=1	6	startsnp=BovineHD0700006601	endsnp=BovineHD0700006654
chr7:25617364-25749162	numsnp=41	length=131,799	state2,cn=1	6	startsnp=BovineHD0700007064	endsnp=BovineHD0700007105
chr7:33128807-33293487	numsnp=38	length=164,681	state2,cn=1	6	startsnp=BovineHD0700009495	endsnp=BovineHD0700009532
chr7:38967158-39123656	numsnp=61	length=156,499	state2,cn=1	6	startsnp=BTB-01364730	endsnp=BovineHD0700011350
chr7:42492420-43182417	numsnp=161	length=689,998	state2,cn=1	6	startsnp=BovineHD0700012370	endsnp=BovineHD0700012527
chr7:47757812-47903864	numsnp=43	length=146,053	state2,cn=1	6	startsnp=BovineHD0700013812	endsnp=BovineHD0700013853
chr7:53536229-53641290	numsnp=60	length=105,062	state2,cn=1	6	startsnp=BovineHD0700015401	endsnp=BovineHD0700015465
chr7:53900821-53952520	numsnp=25	length=51,700	state2,cn=1	6	startsnp=BovineHD0700015547	endsnp=BovineHD0700015573
chr7:87624070-87681984	numsnp=23	length=57,915	state2,cn=1	6	startsnp=BovineHD0700025672	endsnp=BovineHD4100006293
chr7:94562555-94724315	numsnp=48	length=161,761	state2,cn=1	6	startsnp=BovineHD0700027548	endsnp=BovineHD0700027594
chr7:96254960-96422037	numsnp=54	length=167,078	state2,cn=1	6	startsnp=Hapmap46388-BTA-93108	endsnp=BovineHD0700028094
chr7:110713154-110763288	numsnp=25	length=50,135	state2,cn=1	6	startsnp=BovineHD0700032289	endsnp=BovineHD0700032310
chr8:135066-269322	numsnp=31	length=134,257	state2,cn=1	6	startsnp=BovineHD0800000020	endsnp=BovineHD0800000050
chr8:7220044-7282657	numsnp=20	length=62,614	state2,cn=1	6	startsnp=BovineHD0800002286	endsnp=BovineHD0800002305
chr8:23737583-23985363	numsnp=82	length=247,781	state2,cn=1	6	startsnp=BovineHD0800007121	endsnp=BovineHD0800007196
chr8:24927334-25026795	numsnp=33	length=99,462	state2,cn=1	6	startsnp=BovineHD0800007537	endsnp=BovineHD0800007568
chr8:27048244-27168724	numsnp=25	length=120,481	state2,cn=1	6	startsnp=BovineHD0800008154	endsnp=BovineHD0800008177
chr8:32326466-32450361	numsnp=29	length=123,896	state2,cn=1	6	startsnp=BovineHD0800009748	endsnp=BTB-00258020
chr8:41476011-41544668	numsnp=26	length=68,658	state2,cn=1	6	startsnp=BovineHD0800012346	endsnp=BovineHD0800012370
chr8:53467071-53647856	numsnp=36	length=180,786	state2,cn=1	6	startsnp=BovineHD0800016068	endsnp=BovineHD0800016106
chr8:61634559-61851410	numsnp=61	length=216,852	state2,cn=1	6	startsnp=BovineHD0800018424	endsnp=BovineHD0800033257
chr8:72396609-72523721	numsnp=42	length=127,113	state2,cn=1	6	startsnp=BovineHD0800021757	endsnp=BovineHD0800021798
chr8:94460889-94742916	numsnp=78	length=282,028	state2,cn=1	6	startsnp=ARS-BFGL-NGS-50038	endsnp=BovineHD0800028039
chr9:18663304-18862613	numsnp=52	length=199,310	state2,cn=1	6	startsnp=BovineHD0900005071	endsnp=BTA-94407-no-rs
chr9:22281170-22338852	numsnp=19	length=57,683	state2,cn=1	6	startsnp=Hapmap43708-BTA-85337	endsnp=BovineHD0900005994
chr9:30222172-30286871	numsnp=26	length=64,700	state2,cn=1	6	startsnp=BovineHD0900008192	endsnp=BovineHD0900008215
chr9:31240010-31420165	numsnp=59	length=180,156	state2,cn=1	6	startsnp=BovineHD0900031409	endsnp=BovineHD0900008555
chr9:36578334-36679156	numsnp=55	length=100,823	state2,cn=1	6	startsnp=ARS-BFGL-NGS-109026	endsnp=BovineHD0900010120
chr9:40471284-40602886	numsnp=33	length=131,603	state2,cn=1	6	startsnp=BovineHD0900011221	endsnp=BovineHD0900011251
chr9:45514198-45681423	numsnp=61	length=167,226	state2,cn=1	6	startsnp=BovineHD0900012622	endsnp=BovineHD0900012680
chr9:49864630-50021937	numsnp=52	length=157,308	state2,cn=1	6	startsnp=BovineHD0900013749	endsnp=BovineHD0900013797
chr9:64745958-64848827	numsnp=18	length=102,870	state2,cn=1	6	startsnp=BovineHD0900017775	endsnp=BovineHD0900017793
chr9:67167644-67238099	numsnp=17	length=70,456	state2,cn=1	6	startsnp=BovineHD0900018561	endsnp=BovineHD0900018579
chr9:70501867-70662914	numsnp=71	length=161,048	state2,cn=1	6	startsnp=BovineHD0900019502	endsnp=BovineHD0900019571
chr9:79547348-79816568	numsnp=68	length=269,221	state2,cn=1	6	startsnp=BovineHD0900022087	endsnp=BovineHD0900022158
chr9:91577865-91953349	numsnp=111	length=375,485	state2,cn=1	6	startsnp=BovineHD0900025849	endsnp=BovineHD0900025961
chr9:99648129-99741449	numsnp=37	length=93,321	state2,cn=1	6	startsnp=BTA-85069-no-rs	endsnp=BovineHD0900028859
chr10:6695924-6937787	numsnp=62	length=241,864	state2,cn=1	6	startsnp=BovineHD1000002120	endsnp=BovineHD1000002173
chr10:9156800-9245774	numsnp=35	length=88,975	state2,cn=1	6	startsnp=BovineHD1000002987	endsnp=BovineHD1000003022
chr10:18667525-18878078	numsnp=39	length=210,554	state2,cn=1	6	startsnp=BovineHD1000006196	endsnp=BovineHD1000006231
chr10:41276559-41541477	numsnp=60	length=264,919	state2,cn=1	6	startsnp=BovineHD1000012628	endsnp=BovineHD1000012678
chr10:48110941-48226400	numsnp=45	length=115,460	state2,cn=1	6	startsnp=Hapmap51284-BTA-68231	endsnp=BovineHD1000014512
chr10:51319074-51567559	numsnp=49	length=248,486	state2,cn=1	6	startsnp=BovineHD1000015400	endsnp=BovineHD1000015445
chr10:53263650-53503064	numsnp=55	length=239,415	state2,cn=1	6	startsnp=BovineHD1000015909	endsnp=BovineHD1000015954
chr10:68231262-68346891	numsnp=39	length=115,630	state2,cn=1	6	startsnp=BovineHD1000019553	endsnp=BovineHD1000019589
chr10:70750438-71065177	numsnp=104	length=314,740	state2,cn=1	6	startsnp=BovineHD1000020291	endsnp=BovineHD1000020398
chr10:78911500-79443733	numsnp=108	length=532,234	state2,cn=1	6	startsnp=BovineHD1000022589	endsnp=BovineHD1000022694
chr11:15003611-15140536	numsnp=26	length=136,926	state2,cn=1	6	startsnp=BovineHD1100031531	endsnp=BovineHD1100004842
chr11:21551925-21677690	numsnp=60	length=125,766	state2,cn=1	6	startsnp=BovineHD1100006465	endsnp=BovineHD1100006525
chr11:23599074-23737217	numsnp=47	length=138,144	state2,cn=1	6	startsnp=Hapmap59290-rs29022016	endsnp=BovineHD1100007156
chr11:26147981-26276511	numsnp=33	length=128,531	state2,cn=1	6	startsnp=BovineHD1100007820	endsnp=BovineHD1100007855
chr11:30449065-30563026	numsnp=27	length=113,962	state2,cn=1	6	startsnp=Hapmap27192-BTA-152811	endsnp=BovineHD1100009119
chr11:31911599-31984222	numsnp=25	length=72,624	state2,cn=1	6	startsnp=BovineHD1100009585	endsnp=BovineHD1100009609
chr11:58249719-58419387	numsnp=43	length=169,669	state2,cn=1	6	startsnp=BovineHD1100016761	endsnp=ARS-BFGL-BAC-11747
chr11:59809617-59953372	numsnp=27	length=143,756	state2,cn=1	6	startsnp=BovineHD1100017086	endsnp=BovineHD1100017109
chr11:61155733-61393895	numsnp=43	length=238,163	state2,cn=1	6	startsnp=BovineHD1100017432	endsnp=BovineHD1100017477
chr11:69278998-69342635	numsnp=24	length=63,638	state2,cn=1	6	startsnp=BovineHD1100019686	endsnp=BovineHD1100019711
chr11:70865913-70986341	numsnp=30	length=120,429	state2,cn=1	6	startsnp=BovineHD1100020310	endsnp=BovineHD1100020339
chr11:74478406-74624318	numsnp=32	length=145,913	state2,cn=1	6	startsnp=BovineHD1100021273	endsnp=BovineHD1100021302
chr11:75098286-75248626	numsnp=60	length=150,341	state2,cn=1	6	startsnp=BovineHD1100021397	endsnp=BovineHD1100021458
chr11:84704960-84830805	numsnp=46	length=125,846	state2,cn=1	6	startsnp=BovineHD1100024296	endsnp=BovineHD1100024339
chr11:96545041-96756491	numsnp=38	length=211,451	state2,cn=1	6	startsnp=BovineHD1100028055	endsnp=BovineHD1100028091
chr11:103409247-104094452	numsnp=175	length=685,206	state2,cn=1	6	startsnp=BovineHD4100009259	endsnp=BovineHD1100030258
chr11:104571309-104685104	numsnp=33	length=113,796	state2,cn=1	6	startsnp=BovineHD1100030410	endsnp=BovineHD1100030438
chr11:106271198-106512595	numsnp=87	length=241,398	state2,cn=1	6	startsnp=BovineHD1100030820	endsnp=BovineHD1100030909
chr11:106586225-106749016	numsnp=81	length=162,792	state2,cn=1	6	startsnp=BovineHD1100030959	endsnp=BovineHD1100031034
chr12:11853415-11911028	numsnp=28	length=57,614	state2,cn=1	6	startsnp=BovineHD1200003385	endsnp=BovineHD1200003410
chr12:16097311-16178137	numsnp=29	length=80,827	state2,cn=1	6	startsnp=BovineHD1200004845	endsnp=BovineHD1200004870
chr12:28311167-28449408	numsnp=33	length=138,242	state2,cn=1	6	startsnp=BovineHD1200008416	endsnp=BovineHD1200008439
chr12:60218974-60287659	numsnp=28	length=68,686	state2,cn=1	6	startsnp=BovineHD1200016508	endsnp=BovineHD1200016536
chr12:80924626-81051206	numsnp=63	length=126,581	state2,cn=1	6	startsnp=BovineHD1200023152	endsnp=BovineHD1200027158
chr12:84191567-84517741	numsnp=107	length=326,175	state2,cn=1	6	startsnp=BovineHD1200024393	endsnp=BovineHD1200024496
chr13:14509110-14657580	numsnp=43	length=148,471	state2,cn=1	6	startsnp=ARS-BFGL-NGS-114459	endsnp=BovineHD1300004157
chr13:14944963-15218135	numsnp=65	length=273,173	state2,cn=1	6	startsnp=BovineHD1300004248	endsnp=BovineHD1300004313
chr13:18056702-18179388	numsnp=46	length=122,687	state2,cn=1	6	startsnp=BovineHD1300005140	endsnp=BovineHD1300005182
chr13:20352649-20615821	numsnp=50	length=263,173	state2,cn=1	6	startsnp=BovineHD1300005925	endsnp=BTB-01233700
chr13:20937561-21204018	numsnp=105	length=266,458	state2,cn=1	6	startsnp=BovineHD1300006053	endsnp=BovineHD1300006155
chr13:23215544-23402797	numsnp=33	length=187,254	state2,cn=1	6	startsnp=BovineHD1300006760	endsnp=BovineHD1300006796
chr13:36771733-36833775	numsnp=22	length=62,043	state2,cn=1	6	startsnp=BovineHD1300010641	endsnp=BovineHD1300010660
chr14:1549928-2230450	numsnp=136	length=680,523	state2,cn=1	6	startsnp=BovineHD1400000178	endsnp=BovineHD4100010528
chr14:9529801-9605099	numsnp=26	length=75,299	state2,cn=1	6	startsnp=BovineHD1400002682	endsnp=BovineHD1400002699
chr14:27139382-27380992	numsnp=66	length=241,611	state2,cn=1	6	startsnp=BovineHD4100011365	endsnp=Hapmap26621-BTC-072953
chr14:40886879-40967636	numsnp=27	length=80,758	state2,cn=1	6	startsnp=BovineHD1400011703	endsnp=BTB-01387726
chr14:42662145-42973247	numsnp=83	length=311,103	state2,cn=1	6	startsnp=BovineHD1400012139	endsnp=BovineHD1400012216
chr14:43835004-44126252	numsnp=84	length=291,249	state2,cn=1	6	startsnp=BovineHD1400012407	endsnp=Hapmap43697-BTA-82657
chr14:50857512-51017829	numsnp=59	length=160,318	state2,cn=1	6	startsnp=BovineHD1400014435	endsnp=BovineHD1400014488
chr14:52039245-52316871	numsnp=72	length=277,627	state2,cn=1	6	startsnp=BovineHD1400014768	endsnp=BovineHD1400014835
chr14:58063477-58444194	numsnp=69	length=380,718	state2,cn=1	6	startsnp=BovineHD1400016157	endsnp=BTB-01289960
chr14:59996266-60079018	numsnp=27	length=82,753	state2,cn=1	6	startsnp=BovineHD1400016625	endsnp=BovineHD1400016650
chr14:62246259-62305713	numsnp=18	length=59,455	state2,cn=1	6	startsnp=BovineHD1400017271	endsnp=BovineHD1400024146
chr14:62627737-62710391	numsnp=27	length=82,655	state2,cn=1	6	startsnp=BovineHD1400017419	endsnp=BovineHD1400017443
chr14:62782571-63004255	numsnp=50	length=221,685	state2,cn=1	6	startsnp=BovineHD1400017458	endsnp=BTB-01048106
chr14:66783251-67489095	numsnp=170	length=705,845	state2,cn=1	6	startsnp=BovineHD1400018680	endsnp=BovineHD1400018846
chr14:67772389-67867082	numsnp=29	length=94,694	state2,cn=1	6	startsnp=BovineHD1400018917	endsnp=BovineHD1400018944
chr14:71756527-71928766	numsnp=47	length=172,240	state2,cn=1	6	startsnp=BovineHD1400020107	endsnp=BovineHD1400020157
chr14:81483968-81613196	numsnp=36	length=129,229	state2,cn=1	6	startsnp=BovineHD1400023029	endsnp=UA-IFASA-6020
chr14:83547949-83616563	numsnp=35	length=68,615	state2,cn=1	6	startsnp=BovineHD1400023602	endsnp=ARS-BFGL-BAC-20138
chr15:3426781-3750283	numsnp=74	length=323,503	state2,cn=1	6	startsnp=BovineHD1500000780	endsnp=BovineHD1500000843
chr15:36490710-36843061	numsnp=87	length=352,352	state2,cn=1	6	startsnp=BovineHD1500010014	endsnp=BovineHD1500010091
chr15:41278949-41431114	numsnp=51	length=152,166	state2,cn=1	6	startsnp=BovineHD1500011307	endsnp=BovineHD1500011351
chr15:43191872-43308530	numsnp=30	length=116,659	state2,cn=1	6	startsnp=BovineHD1500012012	endsnp=Hapmap46538-BTA-88332
chr15:43791258-43879194	numsnp=29	length=87,937	state2,cn=1	6	startsnp=BovineHD1500012158	endsnp=BovineHD1500012183
chr15:48069753-48261684	numsnp=57	length=191,932	state2,cn=1	6	startsnp=BovineHD1500013785	endsnp=BovineHD1500013847
chr15:63020331-63281076	numsnp=67	length=260,746	state2,cn=1	6	startsnp=BovineHD1500018076	endsnp=BTB-01280741
chr15:64314134-64432293	numsnp=35	length=118,160	state2,cn=1	6	startsnp=BovineHD1500018415	endsnp=BovineHD1500025940
chr15:84861533-85143271	numsnp=70	length=281,739	state2,cn=1	6	startsnp=BovineHD1500024892	endsnp=BovineHD4100012261
chr16:8354209-8486467	numsnp=23	length=132,259	state2,cn=1	6	startsnp=BTB-01921305	endsnp=BTA-88251-no-rs
chr16:26979772-27154383	numsnp=65	length=174,612	state2,cn=1	6	startsnp=BovineHD1600007454	endsnp=BovineHD1600007515
chr16:38360235-38530062	numsnp=40	length=169,828	state2,cn=1	6	startsnp=BovineHD1600011013	endsnp=BovineHD1600011049
chr16:62492831-62742829	numsnp=51	length=249,999	state2,cn=1	6	startsnp=BovineHD1600017541	endsnp=BovineHD1600017586
chr16:68897723-69088226	numsnp=90	length=190,504	state2,cn=1	6	startsnp=BovineHD1600019513	endsnp=BovineHD1600019603
chr16:70814352-70924028	numsnp=24	length=109,677	state2,cn=1	6	startsnp=BovineHD1600020126	endsnp=BovineHD1600020149
chr16:71092127-71180683	numsnp=23	length=88,557	state2,cn=1	6	startsnp=BovineHD1600020185	endsnp=BovineHD1600020209
chr16:72343092-72424276	numsnp=35	length=81,185	state2,cn=1	6	startsnp=BovineHD1600020557	endsnp=BovineHD1600020590
chr17:5173570-5315720	numsnp=36	length=142,151	state2,cn=1	6	startsnp=BovineHD1700001381	endsnp=BovineHD1700001419
chr17:6842003-7210034	numsnp=135	length=368,032	state2,cn=1	6	startsnp=BovineHD1700001968	endsnp=BovineHD1700002101
chr17:20525924-20972376	numsnp=137	length=446,453	state2,cn=1	6	startsnp=BovineHD1700005939	endsnp=BovineHD1700006066
chr17:30161342-30313751	numsnp=28	length=152,410	state2,cn=1	6	startsnp=BovineHD1700008508	endsnp=BovineHD1700008534
chr17:37680285-37772274	numsnp=28	length=91,990	state2,cn=1	6	startsnp=BovineHD1700010287	endsnp=ARS-BFGL-NGS-6358
chr17:73354100-73858134	numsnp=160	length=504,035	state2,cn=1	6	startsnp=BovineHD1700021435	endsnp=BovineHD1700021585
chr17:74555985-75148791	numsnp=126	length=592,807	state2,cn=1	6	startsnp=BovineHD1700021787	endsnp=BovineHD1700022147
chr18:21665648-21907413	numsnp=52	length=241,766	state2,cn=1	6	startsnp=BovineHD1800006681	endsnp=BovineHD1800006726
chr18:38552358-38893878	numsnp=54	length=341,521	state2,cn=1	6	startsnp=BovineHD1800011486	endsnp=BovineHD1800011534
chr18:47070740-47259533	numsnp=58	length=188,794	state2,cn=1	6	startsnp=BovineHD1800013884	endsnp=BTB-00722093
chr19:10837090-10950656	numsnp=51	length=113,567	state2,cn=1	6	startsnp=BovineHD1900002959	endsnp=BovineHD1900003007
chr19:12860683-13002657	numsnp=38	length=141,975	state2,cn=1	6	startsnp=BovineHD4100013944	endsnp=BovineHD1900003435
chr19:36290741-36425950	numsnp=40	length=135,210	state2,cn=1	6	startsnp=BovineHD1900010527	endsnp=BovineHD1900010563
chr19:48181378-48305042	numsnp=31	length=123,665	state2,cn=1	6	startsnp=BovineHD1900013391	endsnp=BovineHD1900013418
chr19:63820023-63912238	numsnp=33	length=92,216	state2,cn=1	6	startsnp=BovineHD1900018484	endsnp=BovineHD1900018521
chr20:2633209-3027758	numsnp=71	length=394,550	state2,cn=1	6	startsnp=BovineHD2000000957	endsnp=BovineHD2000001021
chr20:8475414-8757679	numsnp=60	length=282,266	state2,cn=1	6	startsnp=BTB-00771346	endsnp=Hapmap25538-BTA-134885
chr20:22285687-22386936	numsnp=35	length=101,250	state2,cn=1	6	startsnp=BovineHD2000006690	endsnp=BovineHD2000006725
chr20:26854463-26960799	numsnp=21	length=106,337	state2,cn=1	6	startsnp=BovineHD2000007977	endsnp=BovineHD2000007995
chr20:60604606-60706699	numsnp=30	length=102,094	state2,cn=1	6	startsnp=BovineHD2000017010	endsnp=BovineHD2000017039
chr20:71193953-71571246	numsnp=104	length=377,294	state2,cn=1	6	startsnp=BovineHD2000020821	endsnp=BovineHD2000020917
chr21:7056192-7239529	numsnp=75	length=183,338	state2,cn=1	6	startsnp=BovineHD2100001489	endsnp=BovineHD2100001568
chr21:48045319-48133063	numsnp=32	length=87,745	state2,cn=1	6	startsnp=BovineHD2100013761	endsnp=BovineHD2100013791
chr21:70701216-70896927	numsnp=58	length=195,712	state2,cn=1	6	startsnp=BovineHD2100020703	endsnp=BovineHD2100020748
chr22:44096341-44355284	numsnp=56	length=258,944	state2,cn=1	6	startsnp=BovineHD2200012767	endsnp=BovineHD2200012817
chr22:59964685-60220816	numsnp=82	length=256,132	state2,cn=1	6	startsnp=BovineHD2200017401	endsnp=BovineHD2200017476
chr22:60470891-61379134	numsnp=285	length=908,244	state2,cn=1	6	startsnp=BovineHD2200017599	endsnp=BovineHD2200017860
chr23:2927428-3167662	numsnp=67	length=240,235	state2,cn=1	6	startsnp=BovineHD2300000573	endsnp=UA-IFASA-4895
chr23:16298875-16489116	numsnp=53	length=190,242	state2,cn=1	6	startsnp=BovineHD2300004188	endsnp=BovineHD2300004236
chr23:18259507-18611522	numsnp=77	length=352,016	state2,cn=1	6	startsnp=BovineHD2300004666	endsnp=BovineHD2300015594
chr23:51223451-51391263	numsnp=46	length=167,813	state2,cn=1	6	startsnp=BovineHD2300014902	endsnp=BovineHD2300014943
chr23:51877005-52015979	numsnp=38	length=138,975	state2,cn=1	6	startsnp=BovineHD2300015077	endsnp=BovineHD2300015109
chr24:20287554-20572058	numsnp=59	length=284,505	state2,cn=1	6	startsnp=BovineHD2400005441	endsnp=BovineHD2400005495
chr25:271849-659538	numsnp=98	length=387,690	state2,cn=1	6	startsnp=BovineHD2500000048	endsnp=BovineHD2500000133
chr25:739054-1431881	numsnp=180	length=692,828	state2,cn=1	6	startsnp=BovineHD2500000168	endsnp=Hapmap33541-BTC-016426
chr25:1602629-2011350	numsnp=94	length=408,722	state2,cn=1	6	startsnp=BovineHD2500000334	endsnp=BovineHD2500000406
chr25:19433133-19581064	numsnp=27	length=147,932	state2,cn=1	6	startsnp=BovineHD2500005406	endsnp=ARS-BFGL-NGS-31542
chr25:41129839-41374004	numsnp=71	length=244,166	state2,cn=1	6	startsnp=BovineHD4100017542	endsnp=BovineHD4100017560
chr25:41596286-42760285	numsnp=306	length=1,164,000	state2,cn=1	6	startsnp=ARS-BFGL-NGS-30598	endsnp=BovineHD2500011963
chr26:10213497-10338075	numsnp=55	length=124,579	state2,cn=1	6	startsnp=BovineHD2600002555	endsnp=BovineHD2600002610
chr26:20561955-20638570	numsnp=18	length=76,616	state2,cn=1	6	startsnp=BovineHD2600005334	endsnp=BovineHD2600005347
chr26:50816998-51680135	numsnp=261	length=863,138	state2,cn=1	6	startsnp=BovineHD2600014694	endsnp=ARS-BFGL-NGS-17431
chr28:19509353-19674311	numsnp=58	length=164,959	state2,cn=1	6	startsnp=BovineHD2800005275	endsnp=BovineHD2800005334
chr28:24885275-25247007	numsnp=65	length=361,733	state2,cn=1	6	startsnp=BovineHD2800006444	endsnp=BovineHD2800006498
chr28:38966398-39382027	numsnp=103	length=415,630	state2,cn=1	6	startsnp=BovineHD2800010816	endsnp=BovineHD2800010910
chr29:5011191-5098831	numsnp=50	length=87,641	state2,cn=1	6	startsnp=BovineHD2900001406	endsnp=BovineHD2900001456
chr29:36742048-36851289	numsnp=34	length=109,242	state2,cn=1	6	startsnp=BovineHD2900011109	endsnp=BovineHD2900011141
chr29:49343800-49812821	numsnp=87	length=469,022	state2,cn=1	6	startsnp=BovineHD2900014549	endsnp=BovineHD2900014632
chr29:49997333-50325501	numsnp=63	length=328,169	state2,cn=1	6	startsnp=BovineHD2900014664	endsnp=BovineHD2900014722
chr29:50936491-51174708	numsnp=51	length=238,218	state2,cn=1	6	startsnp=BovineHD2900014858	endsnp=BovineHD2900014907
chr29:51258823-51502868	numsnp=52	length=244,046	state2,cn=1	6	startsnp=BovineHD2900014928	endsnp=ARS-BFGL-NGS-29340
chr3:120470286-120552193	numsnp=24	length=81,908	state5,cn=3	6	startsnp=BovineHD0300035228	endsnp=BovineHD0300035250
chr5:5101-214612	numsnp=38	length=209,512	state5,cn=3	6	startsnp=BovineHD0500000001	endsnp=BovineHD0500000050
chr14:62713422-62769117	numsnp=13	length=55,696	state5,cn=3	6	startsnp=BovineHD1400017444	endsnp=BovineHD1400017455
chr29:38567737-38797907	numsnp=41	length=230,171	state5,cn=3	6	startsnp=BovineHD2900011663	endsnp=BovineHD2900011743
chr6:6502610-6902973	numsnp=78	length=400,364	state6,cn=4	6	startsnp=BovineHD0600001420	endsnp=BovineHD0600001493
chr5:58376266-58441130	numsnp=10	length=64,865	state1,cn=0	7	startsnp=BovineHD0500016449	endsnp=BovineHD0500016460
chr5:117281795-117492470	numsnp=26	length=210,676	state1,cn=0	7	startsnp=BovineHD0500034077	endsnp=BovineHD0500034134
chr12:32054331-32182960	numsnp=16	length=128,630	state1,cn=0	7	startsnp=BovineHD1200009422	endsnp=BovineHD1200027784
chr12:70392108-70620665	numsnp=24	length=228,558	state1,cn=0	7	startsnp=BovineHD1200019356	endsnp=BovineHD1200019397
chr12:72748544-72882991	numsnp=11	length=134,448	state1,cn=0	7	startsnp=BovineHD1200020098	endsnp=BovineHD1200020124
chr13:170016-329928	numsnp=15	length=159,913	state1,cn=0	7	startsnp=BovineHD1300000020	endsnp=BovineHD1300000050
chr15:47873132-47936886	numsnp=15	length=63,755	state1,cn=0	7	startsnp=BovineHD1500013731	endsnp=BTB-01881715
chr15:51653453-51710421	numsnp=11	length=56,969	state1,cn=0	7	startsnp=BovineHD1500025869	endsnp=BovineHD1500014887
chr15:79862446-79923112	numsnp=18	length=60,667	state1,cn=0	7	startsnp=BovineHD1500026016	endsnp=BTB-01793260
chr15:80176347-80316180	numsnp=34	length=139,834	state1,cn=0	7	startsnp=BovineHD1500026018	endsnp=BovineHD1500023410
chr16:5676289-5789669	numsnp=27	length=113,381	state1,cn=0	7	startsnp=BovineHD1600001604	endsnp=BovineHD1600001649
chr16:8091686-8163296	numsnp=16	length=71,611	state1,cn=0	7	startsnp=BovineHD1600002309	endsnp=BovineHD1600002324
chr16:8414004-8486467	numsnp=12	length=72,464	state1,cn=0	7	startsnp=BTA-26788-no-rs	endsnp=BTA-88251-no-rs
chr1:20033381-20093504	numsnp=23	length=60,124	state2,cn=1	7	startsnp=BovineHD0100005949	endsnp=BovineHD0100005969
chr1:20670704-20792484	numsnp=43	length=121,781	state2,cn=1	7	startsnp=BovineHD0100006120	endsnp=BovineHD0100006158
chr1:60027340-60260551	numsnp=68	length=233,212	state2,cn=1	7	startsnp=BovineHD0100016970	endsnp=BovineHD0100017031
chr1:66217192-66494267	numsnp=73	length=277,076	state2,cn=1	7	startsnp=BovineHD0100018681	endsnp=BovineHD0100018748
chr1:72759693-72924118	numsnp=40	length=164,426	state2,cn=1	7	startsnp=BovineHD0100020842	endsnp=BovineHD0100020880
chr1:76601238-76693531	numsnp=42	length=92,294	state2,cn=1	7	startsnp=BovineHD0100022072	endsnp=BovineHD0100022112
chr1:84617946-84812405	numsnp=44	length=194,460	state2,cn=1	7	startsnp=BovineHD0100024241	endsnp=BovineHD0100024281
chr1:127509349-127638130	numsnp=27	length=128,782	state2,cn=1	7	startsnp=BovineHD0100036038	endsnp=BovineHD0100036058
chr1:131409580-131495551	numsnp=29	length=85,972	state2,cn=1	7	startsnp=BovineHD0100037357	endsnp=BovineHD0100037383
chr1:133527757-133616398	numsnp=22	length=88,642	state2,cn=1	7	startsnp=BovineHD0100038032	endsnp=BovineHD0100038049
chr1:147010912-147066830	numsnp=31	length=55,919	state2,cn=1	7	startsnp=BovineHD0100042491	endsnp=ARS-BFGL-NGS-1705
chr2:24714894-24889494	numsnp=34	length=174,601	state2,cn=1	7	startsnp=BovineHD0200007107	endsnp=BovineHD0200007153
chr2:31386349-31535313	numsnp=53	length=148,965	state2,cn=1	7	startsnp=BovineHD0200009292	endsnp=BovineHD0200009338
chr2:36805443-37085429	numsnp=64	length=279,987	state2,cn=1	7	startsnp=BovineHD0200010796	endsnp=BovineHD0200010861
chr2:47963062-48448951	numsnp=118	length=485,890	state2,cn=1	7	startsnp=BovineHD0200013904	endsnp=BovineHD0200014012
chr2:61708027-61787820	numsnp=40	length=79,794	state2,cn=1	7	startsnp=BovineHD0200017729	endsnp=BovineHD0200017770
chr2:101874238-102147637	numsnp=69	length=273,400	state2,cn=1	7	startsnp=BovineHD0200029246	endsnp=BovineHD0200029333
chr2:136375337-136633667	numsnp=63	length=258,331	state2,cn=1	7	startsnp=BovineHD0200039994	endsnp=BovineHD0200040051
chr3:604022-787371	numsnp=45	length=183,350	state2,cn=1	7	startsnp=BovineHD0300000127	endsnp=ARS-BFGL-NGS-67047
chr3:15161588-15320333	numsnp=52	length=158,746	state2,cn=1	7	startsnp=BovineHD0300004938	endsnp=BovineHD0300004992
chr3:43376774-43537606	numsnp=67	length=160,833	state2,cn=1	7	startsnp=BovineHD0300013191	endsnp=BovineHD0300013262
chr3:79670682-79765949	numsnp=32	length=95,268	state2,cn=1	7	startsnp=BovineHD0300022959	endsnp=BovineHD0300022989
chr3:83505232-83667732	numsnp=41	length=162,501	state2,cn=1	7	startsnp=BovineHD0300023896	endsnp=BovineHD0300023929
chr3:94416488-94515232	numsnp=24	length=98,745	state2,cn=1	7	startsnp=BovineHD0300027205	endsnp=BovineHD0300036315
chr3:98462466-98522298	numsnp=26	length=59,833	state2,cn=1	7	startsnp=BovineHD0300028298	endsnp=BovineHD0300028322
chr3:110901226-111027481	numsnp=38	length=126,256	state2,cn=1	7	startsnp=BovineHD0300031907	endsnp=BovineHD0300031942
chr3:118071660-118137556	numsnp=19	length=65,897	state2,cn=1	7	startsnp=BovineHD0300034431	endsnp=BovineHD0300034447
chr3:120552193-120836801	numsnp=73	length=284,609	state2,cn=1	7	startsnp=BovineHD0300035250	endsnp=BovineHD0300035314
chr3:120883492-121141746	numsnp=72	length=258,255	state2,cn=1	7	startsnp=BovineHD4100002577	endsnp=BovineHD0300035391
chr4:48672797-48911944	numsnp=51	length=239,148	state2,cn=1	7	startsnp=BovineHD0400013379	endsnp=BovineHD0400013427
chr4:51318774-51371784	numsnp=12	length=53,011	state2,cn=1	7	startsnp=BovineHD0400014199	endsnp=BovineHD0400014207
chr4:72375370-72513244	numsnp=29	length=137,875	state2,cn=1	7	startsnp=BovineHD0400020051	endsnp=BovineHD0400020079
chr4:78652494-78808735	numsnp=49	length=156,242	state2,cn=1	7	startsnp=BovineHD0400021810	endsnp=BovineHD0400021855
chr4:88782951-88837310	numsnp=16	length=54,360	state2,cn=1	7	startsnp=Hapmap55855-rs29017652	endsnp=BovineHD0400024598
chr5:40780471-40879690	numsnp=30	length=99,220	state2,cn=1	7	startsnp=BovineHD0500011670	endsnp=BovineHD0500011695
chr5:41283515-41440820	numsnp=50	length=157,306	state2,cn=1	7	startsnp=BovineHD0500011778	endsnp=BovineHD0500011831
chr5:51265925-51515066	numsnp=64	length=249,142	state2,cn=1	7	startsnp=BovineHD0500014753	endsnp=BovineHD0500014818
chr5:76653989-76747494	numsnp=14	length=93,506	state2,cn=1	7	startsnp=BovineHD0500021851	endsnp=BovineHD0500021861
chr5:79159916-79322625	numsnp=33	length=162,710	state2,cn=1	7	startsnp=BovineHD0500022469	endsnp=BovineHD0500022499
chr5:99937939-100129380	numsnp=58	length=191,442	state2,cn=1	7	startsnp=BovineHD0500028597	endsnp=BovineHD0500028662
chr5:102770798-102954266	numsnp=66	length=183,469	state2,cn=1	7	startsnp=BovineHD0500029438	endsnp=Hapmap40294-BTA-89295
chr5:117938671-118034651	numsnp=28	length=95,981	state2,cn=1	7	startsnp=ARS-BFGL-NGS-37762	endsnp=BovineHD0500034268
chr6:72540759-72597889	numsnp=19	length=57,131	state2,cn=1	7	startsnp=BovineHD0600020146	endsnp=BovineHD0600020163
chr6:107212183-107291500	numsnp=21	length=79,318	state2,cn=1	7	startsnp=BovineHD0600030165	endsnp=BovineHD0600030185
chr6:109059937-109844160	numsnp=154	length=784,224	state2,cn=1	7	startsnp=BovineHD0600030744	endsnp=BovineHD0600030892
chr6:118916646-119035273	numsnp=40	length=118,628	state2,cn=1	7	startsnp=BovineHD0600034021	endsnp=BovineHD0600034056
chr6:119400534-119454666	numsnp=14	length=54,133	state2,cn=1	7	startsnp=BovineHD0600034219	endsnp=BovineHD0600034414
chr7:24107045-24286099	numsnp=54	length=179,055	state2,cn=1	7	startsnp=BovineHD0700006603	endsnp=BovineHD0700006654
chr7:39067512-39123656	numsnp=22	length=56,145	state2,cn=1	7	startsnp=BovineHD0700011330	endsnp=BovineHD0700011350
chr7:47757812-47868633	numsnp=32	length=110,822	state2,cn=1	7	startsnp=BovineHD0700013812	endsnp=BovineHD0700013842
chr7:53536229-53641290	numsnp=60	length=105,062	state2,cn=1	7	startsnp=BovineHD0700015401	endsnp=BovineHD0700015465
chr7:53900821-53952520	numsnp=25	length=51,700	state2,cn=1	7	startsnp=BovineHD0700015547	endsnp=BovineHD0700015573
chr7:88313510-88381298	numsnp=24	length=67,789	state2,cn=1	7	startsnp=BovineHD0700025856	endsnp=BTB-00325285
chr7:89283062-89388323	numsnp=31	length=105,262	state2,cn=1	7	startsnp=BovineHD0700026195	endsnp=BovineHD0700026219
chr7:109890025-110014198	numsnp=17	length=124,174	state2,cn=1	7	startsnp=ARS-BFGL-NGS-81660	endsnp=BovineHD0700032114
chr8:7220044-7282657	numsnp=20	length=62,614	state2,cn=1	7	startsnp=BovineHD0800002286	endsnp=BovineHD0800002305
chr8:26955095-27168724	numsnp=38	length=213,630	state2,cn=1	7	startsnp=BovineHD0800008141	endsnp=BovineHD0800008177
chr8:41476011-41544668	numsnp=26	length=68,658	state2,cn=1	7	startsnp=BovineHD0800012346	endsnp=BovineHD0800012370
chr8:53477189-53599895	numsnp=25	length=122,707	state2,cn=1	7	startsnp=BovineHD0800016069	endsnp=BovineHD0800016096
chr9:15402493-15511313	numsnp=35	length=108,821	state2,cn=1	7	startsnp=BovineHD0900004071	endsnp=BovineHD0900004105
chr9:64762696-64848827	numsnp=15	length=86,132	state2,cn=1	7	startsnp=BovineHD0900017778	endsnp=BovineHD0900017793
chr9:103692309-103910391	numsnp=93	length=218,083	state2,cn=1	7	startsnp=BovineHD0900030412	endsnp=BovineHD0900030498
chr10:18767514-18878078	numsnp=20	length=110,565	state2,cn=1	7	startsnp=BovineHD1000006214	endsnp=BovineHD1000006231
chr10:70750438-70878349	numsnp=27	length=127,912	state2,cn=1	7	startsnp=BovineHD1000020291	endsnp=BovineHD1000020317
chr10:79106293-79312084	numsnp=52	length=205,792	state2,cn=1	7	startsnp=BovineHD1000022619	endsnp=BovineHD1000022668
chr11:15003611-15144476	numsnp=27	length=140,866	state2,cn=1	7	startsnp=BovineHD1100031531	endsnp=BovineHD1100004843
chr11:30449065-30558447	numsnp=26	length=109,383	state2,cn=1	7	startsnp=Hapmap27192-BTA-152811	endsnp=BovineHD4100008688
chr11:58267632-58419387	numsnp=35	length=151,756	state2,cn=1	7	startsnp=BovineHD1100016769	endsnp=ARS-BFGL-BAC-11747
chr11:59809617-59953372	numsnp=27	length=143,756	state2,cn=1	7	startsnp=BovineHD1100017086	endsnp=BovineHD1100017109
chr11:70865913-70986341	numsnp=30	length=120,429	state2,cn=1	7	startsnp=BovineHD1100020310	endsnp=BovineHD1100020339
chr11:103603692-104094452	numsnp=127	length=490,761	state2,cn=1	7	startsnp=BovineHD1100031356	endsnp=BovineHD1100030258
chr11:104571309-104679644	numsnp=31	length=108,336	state2,cn=1	7	startsnp=BovineHD1100030410	endsnp=ARS-BFGL-NGS-26791
chr11:105638713-105791903	numsnp=35	length=153,191	state2,cn=1	7	startsnp=BovineHD1100030682	endsnp=BovineHD1100030711
chr11:105928836-106459392	numsnp=143	length=530,557	state2,cn=1	7	startsnp=BovineHD1100030739	endsnp=BovineHD1100030884
chr11:106586225-106710431	numsnp=61	length=124,207	state2,cn=1	7	startsnp=BovineHD1100030959	endsnp=BovineHD1100031014
chr12:16097311-16187847	numsnp=31	length=90,537	state2,cn=1	7	startsnp=BovineHD1200004845	endsnp=BovineHD4100009396
chr12:29358497-29463245	numsnp=22	length=104,749	state2,cn=1	7	startsnp=BovineHD1200008669	endsnp=BovineHD1200026865
chr12:56149521-56204081	numsnp=16	length=54,561	state2,cn=1	7	startsnp=BTB-00499395	endsnp=ARS-BFGL-NGS-20125
chr12:90314332-90789716	numsnp=142	length=475,385	state2,cn=1	7	startsnp=BovineHD1200026472	endsnp=BovineHD1200026599
chr13:20352649-20615821	numsnp=50	length=263,173	state2,cn=1	7	startsnp=BovineHD1300005925	endsnp=BTB-01233700
chr13:20937561-21042957	numsnp=50	length=105,397	state2,cn=1	7	startsnp=BovineHD1300006053	endsnp=BovineHD1300024548
chr13:36782813-36833775	numsnp=18	length=50,963	state2,cn=1	7	startsnp=Hapmap25918-BTA-163236	endsnp=BovineHD1300010660
chr14:1549928-1873047	numsnp=62	length=323,120	state2,cn=1	7	startsnp=BovineHD1400000178	endsnp=BovineHD1400000244
chr14:2015554-2230450	numsnp=49	length=214,897	state2,cn=1	7	startsnp=BovineHD1400000274	endsnp=BovineHD4100010528
chr14:2790501-2898515	numsnp=17	length=108,015	state2,cn=1	7	startsnp=BovineHD4100010557	endsnp=BovineHD1400000467
chr14:9529801-9605099	numsnp=26	length=75,299	state2,cn=1	7	startsnp=BovineHD1400002682	endsnp=BovineHD1400002699
chr14:44047994-44144717	numsnp=31	length=96,724	state2,cn=1	7	startsnp=BovineHD1400012467	endsnp=BovineHD1400012494
chr14:62627737-62689223	numsnp=22	length=61,487	state2,cn=1	7	startsnp=BovineHD1400017419	endsnp=BovineHD1400017438
chr14:62807894-63008806	numsnp=46	length=200,913	state2,cn=1	7	startsnp=BovineHD1400017461	endsnp=BovineHD1400017503
chr14:66819485-67489095	numsnp=161	length=669,611	state2,cn=1	7	startsnp=ARS-BFGL-NGS-115036	endsnp=BovineHD1400018846
chr14:71793738-71928766	numsnp=38	length=135,029	state2,cn=1	7	startsnp=ARS-BFGL-NGS-60065	endsnp=BovineHD1400020157
chr14:83547949-83615008	numsnp=33	length=67,060	state2,cn=1	7	startsnp=BovineHD1400023602	endsnp=BovineHD1400023633
chr15:20652041-20762546	numsnp=41	length=110,506	state2,cn=1	7	startsnp=BovineHD1500005241	endsnp=BovineHD1500005280
chr15:43195359-43315325	numsnp=30	length=119,967	state2,cn=1	7	startsnp=BovineHD1500012013	endsnp=BovineHD1500012040
chr15:43791258-43879194	numsnp=29	length=87,937	state2,cn=1	7	startsnp=BovineHD1500012158	endsnp=BovineHD1500012183
chr15:47946424-48047397	numsnp=12	length=100,974	state2,cn=1	7	startsnp=BovineHD1500025806	endsnp=BovineHD1500013779
chr15:79969535-80027404	numsnp=16	length=57,870	state2,cn=1	7	startsnp=BovineHD1500023333	endsnp=BovineHD1500023348
chr16:27054295-27154383	numsnp=34	length=100,089	state2,cn=1	7	startsnp=BovineHD1600007483	endsnp=BovineHD1600007515
chr16:38371856-38424448	numsnp=18	length=52,593	state2,cn=1	7	startsnp=BovineHD1600011020	endsnp=BovineHD1600011036
chr16:68969160-69088226	numsnp=49	length=119,067	state2,cn=1	7	startsnp=BovineHD1600019556	endsnp=BovineHD1600019603
chr16:70814352-70924028	numsnp=24	length=109,677	state2,cn=1	7	startsnp=BovineHD1600020126	endsnp=BovineHD1600020149
chr16:71083442-71180683	numsnp=26	length=97,242	state2,cn=1	7	startsnp=BovineHD1600020182	endsnp=BovineHD1600020209
chr16:72365972-72424276	numsnp=23	length=58,305	state2,cn=1	7	startsnp=BTB-00659445	endsnp=BovineHD1600020590
chr17:6932461-7188339	numsnp=89	length=255,879	state2,cn=1	7	startsnp=BovineHD1700002006	endsnp=BovineHD1700002092
chr17:30161342-30313751	numsnp=28	length=152,410	state2,cn=1	7	startsnp=BovineHD1700008508	endsnp=BovineHD1700008534
chr17:73342947-73858134	numsnp=164	length=515,188	state2,cn=1	7	startsnp=BovineHD1700021432	endsnp=BovineHD1700021585
chr17:74745744-75148791	numsnp=72	length=403,048	state2,cn=1	7	startsnp=BovineHD1700021838	endsnp=BovineHD1700022147
chr19:12909660-12979907	numsnp=23	length=70,248	state2,cn=1	7	startsnp=BovineHD4100013951	endsnp=BovineHD1900003431
chr19:41488860-41562217	numsnp=24	length=73,358	state2,cn=1	7	startsnp=Hapmap54523-ss46526232	endsnp=BovineHD1900011838
chr19:48181378-48305042	numsnp=31	length=123,665	state2,cn=1	7	startsnp=BovineHD1900013391	endsnp=BovineHD1900013418
chr20:8475414-8757679	numsnp=60	length=282,266	state2,cn=1	7	startsnp=BTB-00771346	endsnp=Hapmap25538-BTA-134885
chr20:71214057-71591346	numsnp=104	length=377,290	state2,cn=1	7	startsnp=BovineHD2000020825	endsnp=BovineHD2000020922
chr21:70221263-70393623	numsnp=58	length=172,361	state2,cn=1	7	startsnp=BovineHD2100020518	endsnp=ARS-BFGL-NGS-71316
chr21:70701216-70901743	numsnp=59	length=200,528	state2,cn=1	7	startsnp=BovineHD2100020703	endsnp=ARS-BFGL-NGS-111489
chr22:44160849-44355284	numsnp=43	length=194,436	state2,cn=1	7	startsnp=BovineHD2200012779	endsnp=BovineHD2200012817
chr22:59979559-60222074	numsnp=80	length=242,516	state2,cn=1	7	startsnp=BovineHD2200017404	endsnp=BovineHD2200017477
chr22:60470891-60527377	numsnp=18	length=56,487	state2,cn=1	7	startsnp=BovineHD2200017599	endsnp=BovineHD2200017616
chr22:60816476-61005174	numsnp=61	length=188,699	state2,cn=1	7	startsnp=BovineHD2200017714	endsnp=BovineHD2200017767
chr23:26663258-26745815	numsnp=21	length=82,558	state2,cn=1	7	startsnp=BovineHD2300007219	endsnp=BovineHD2300007240
chr25:233518-668542	numsnp=107	length=435,025	state2,cn=1	7	startsnp=BovineHD2500000045	endsnp=BovineHD4100016796
chr25:767659-1214553	numsnp=119	length=446,895	state2,cn=1	7	startsnp=BovineHD2500000181	endsnp=BovineHD2500000273
chr25:19373377-19581064	numsnp=42	length=207,688	state2,cn=1	7	startsnp=BovineHD2500005390	endsnp=ARS-BFGL-NGS-31542
chr25:39733401-39807389	numsnp=29	length=73,989	state2,cn=1	7	startsnp=BovineHD2500011086	endsnp=BovineHD2500011108
chr25:41174512-41374004	numsnp=53	length=199,493	state2,cn=1	7	startsnp=BovineHD2500011618	endsnp=BovineHD4100017560
chr25:41596286-42740703	numsnp=300	length=1,144,418	state2,cn=1	7	startsnp=ARS-BFGL-NGS-30598	endsnp=BovineHD2500012250
chr26:20561955-20638570	numsnp=18	length=76,616	state2,cn=1	7	startsnp=BovineHD2600005334	endsnp=BovineHD2600005347
chr26:50795857-51305646	numsnp=132	length=509,790	state2,cn=1	7	startsnp=BovineHD2600014687	endsnp=BovineHD2600014814
chr26:51460945-51578480	numsnp=45	length=117,536	state2,cn=1	7	startsnp=ARS-BFGL-NGS-101725	endsnp=BovineHD2600014908
chr28:19549475-19674311	numsnp=39	length=124,837	state2,cn=1	7	startsnp=BovineHD2800005295	endsnp=BovineHD2800005334
chr28:24934707-25216073	numsnp=48	length=281,367	state2,cn=1	7	startsnp=BTA-63758-no-rs	endsnp=BovineHD2800006493
chr29:49007648-49140640	numsnp=24	length=132,993	state2,cn=1	7	startsnp=BovineHD2900014487	endsnp=BovineHD2900015619
chr29:49997333-50325501	numsnp=63	length=328,169	state2,cn=1	7	startsnp=BovineHD2900014664	endsnp=BovineHD2900014722
chr5:5101-228001	numsnp=39	length=222,901	state5,cn=3	7	startsnp=BovineHD0500000001	endsnp=BovineHD0500000051
chr10:23160598-23710290	numsnp=25	length=549,693	state5,cn=3	7	startsnp=BovineHD1000007621	endsnp=BovineHD1000007773
chr11:105796496-105918114	numsnp=29	length=121,619	state5,cn=3	7	startsnp=BovineHD1100030712	endsnp=BovineHD1100030738
chr12:70645065-70868927	numsnp=17	length=223,863	state5,cn=3	7	startsnp=BovineHD1200019402	endsnp=BovineHD1200019452
chr16:5796090-5869640	numsnp=13	length=73,551	state5,cn=3	7	startsnp=BovineHD1600001650	endsnp=BovineHD1600001677
chr29:38567737-39269818	numsnp=70	length=702,082	state5,cn=3	7	startsnp=BovineHD2900011663	endsnp=BovineHD2900011832
chr6:6502610-6902973	numsnp=78	length=400,364	state6,cn=4	7	startsnp=BovineHD0600001420	endsnp=BovineHD0600001493
chr1:93730576-93819471	numsnp=10	length=88,896	state1,cn=0	8	startsnp=BovineHD0100047110	endsnp=BovineHD0100026605
chr5:117533059-117639815	numsnp=11	length=106,757	state1,cn=0	8	startsnp=BovineHD0500034145	endsnp=BovineHD0500034161
chr12:32054331-32162911	numsnp=13	length=108,581	state1,cn=0	8	startsnp=BovineHD1200009422	endsnp=BovineHD1200009451
chr12:70392108-70620665	numsnp=24	length=228,558	state1,cn=0	8	startsnp=BovineHD1200019356	endsnp=BovineHD1200019397
chr15:51653453-51710421	numsnp=11	length=56,969	state1,cn=0	8	startsnp=BovineHD1500025869	endsnp=BovineHD1500014887
chr16:5676289-5789669	numsnp=27	length=113,381	state1,cn=0	8	startsnp=BovineHD1600001604	endsnp=BovineHD1600001649
chr16:8414004-8486467	numsnp=12	length=72,464	state1,cn=0	8	startsnp=BTA-26788-no-rs	endsnp=BTA-88251-no-rs
chr1:20033381-20093504	numsnp=23	length=60,124	state2,cn=1	8	startsnp=BovineHD0100005949	endsnp=BovineHD0100005969
chr1:20670704-20792484	numsnp=43	length=121,781	state2,cn=1	8	startsnp=BovineHD0100006120	endsnp=BovineHD0100006158
chr1:32776060-33036107	numsnp=66	length=260,048	state2,cn=1	8	startsnp=BovineHD0100009444	endsnp=BTB-00015939
chr1:60022354-60260551	numsnp=69	length=238,198	state2,cn=1	8	startsnp=BovineHD4100000336	endsnp=BovineHD0100017031
chr1:66210604-66494267	numsnp=74	length=283,664	state2,cn=1	8	startsnp=BovineHD0100018680	endsnp=BovineHD0100018748
chr1:70852215-70968244	numsnp=25	length=116,030	state2,cn=1	8	startsnp=Hapmap48672-BTA-17044	endsnp=BovineHD0100020309
chr1:72115021-72387471	numsnp=42	length=272,451	state2,cn=1	8	startsnp=BovineHD0100020680	endsnp=BovineHD0100020714
chr1:72759693-72931620	numsnp=41	length=171,928	state2,cn=1	8	startsnp=BovineHD0100020842	endsnp=BovineHD0100020881
chr1:76601238-76755599	numsnp=62	length=154,362	state2,cn=1	8	startsnp=BovineHD0100022072	endsnp=BovineHD0100022133
chr1:84617946-84860353	numsnp=54	length=242,408	state2,cn=1	8	startsnp=BovineHD0100024241	endsnp=BovineHD0100024294
chr1:133527757-133616398	numsnp=22	length=88,642	state2,cn=1	8	startsnp=BovineHD0100038032	endsnp=BovineHD0100038049
chr1:147010912-147107559	numsnp=40	length=96,648	state2,cn=1	8	startsnp=BovineHD0100042491	endsnp=BovineHD4100000845
chr1:147301032-147410842	numsnp=48	length=109,811	state2,cn=1	8	startsnp=BovineHD0100042579	endsnp=BovineHD0100042628
chr2:24714894-24891260	numsnp=35	length=176,367	state2,cn=1	8	startsnp=BovineHD0200007107	endsnp=BovineHD0200007154
chr2:31238054-31448479	numsnp=82	length=210,426	state2,cn=1	8	startsnp=BovineHD0200009241	endsnp=BovineHD0200009315
chr2:36805443-37107860	numsnp=70	length=302,418	state2,cn=1	8	startsnp=BovineHD0200010796	endsnp=BovineHD0200040575
chr2:48003476-48448951	numsnp=109	length=445,476	state2,cn=1	8	startsnp=BovineHD0200013914	endsnp=BovineHD0200014012
chr2:51161504-51397309	numsnp=65	length=235,806	state2,cn=1	8	startsnp=BovineHD0200014670	endsnp=BovineHD0200014735
chr2:54031370-54173199	numsnp=27	length=141,830	state2,cn=1	8	startsnp=BovineHD0200015388	endsnp=BovineHD0200015413
chr2:62184216-62312351	numsnp=30	length=128,136	state2,cn=1	8	startsnp=BovineHD0200017961	endsnp=BovineHD0200017992
chr2:101860421-102147637	numsnp=75	length=287,217	state2,cn=1	8	startsnp=BovineHD0200029238	endsnp=BovineHD0200029333
chr3:604022-797529	numsnp=47	length=193,508	state2,cn=1	8	startsnp=BovineHD0300000127	endsnp=BovineHD0300000172
chr3:15134238-15320333	numsnp=63	length=186,096	state2,cn=1	8	startsnp=BovineHD0300004928	endsnp=BovineHD0300004992
chr3:40608342-40667345	numsnp=19	length=59,004	state2,cn=1	8	startsnp=BovineHD0300012370	endsnp=BovineHD0300012387
chr3:43376774-43537606	numsnp=67	length=160,833	state2,cn=1	8	startsnp=BovineHD0300013191	endsnp=BovineHD0300013262
chr3:45617303-45780597	numsnp=48	length=163,295	state2,cn=1	8	startsnp=BovineHD0300013900	endsnp=BovineHD0300013944
chr3:79670682-79765949	numsnp=32	length=95,268	state2,cn=1	8	startsnp=BovineHD0300022959	endsnp=BovineHD0300022989
chr3:83505232-83667732	numsnp=41	length=162,501	state2,cn=1	8	startsnp=BovineHD0300023896	endsnp=BovineHD0300023929
chr3:94416488-94515232	numsnp=24	length=98,745	state2,cn=1	8	startsnp=BovineHD0300027205	endsnp=BovineHD0300036315
chr3:98358893-98552988	numsnp=77	length=194,096	state2,cn=1	8	startsnp=BovineHD0300028257	endsnp=INRA-437
chr3:118071660-118137556	numsnp=19	length=65,897	state2,cn=1	8	startsnp=BovineHD0300034431	endsnp=BovineHD0300034447
chr3:118619968-118719398	numsnp=42	length=99,431	state2,cn=1	8	startsnp=BovineHD0300034596	endsnp=BovineHD0300034635
chr3:120629858-120836801	numsnp=50	length=206,944	state2,cn=1	8	startsnp=BovineHD0300035271	endsnp=BovineHD0300035314
chr3:120986297-121143331	numsnp=38	length=157,035	state2,cn=1	8	startsnp=BovineHD0300035358	endsnp=ARS-BFGL-NGS-2087
chr4:43716247-43892016	numsnp=33	length=175,770	state2,cn=1	8	startsnp=BovineHD0400011963	endsnp=BovineHD0400011995
chr4:48672797-48900199	numsnp=49	length=227,403	state2,cn=1	8	startsnp=BovineHD0400013379	endsnp=BovineHD0400013424
chr4:51318774-51371784	numsnp=12	length=53,011	state2,cn=1	8	startsnp=BovineHD0400014199	endsnp=BovineHD0400014207
chr4:72375370-72513244	numsnp=29	length=137,875	state2,cn=1	8	startsnp=BovineHD0400020051	endsnp=BovineHD0400020079
chr4:78652494-78808735	numsnp=49	length=156,242	state2,cn=1	8	startsnp=BovineHD0400021810	endsnp=BovineHD0400021855
chr4:83537834-83757800	numsnp=59	length=219,967	state2,cn=1	8	startsnp=BovineHD0400023154	endsnp=BovineHD0400023207
chr4:88769527-88837310	numsnp=20	length=67,784	state2,cn=1	8	startsnp=BovineHD0400024582	endsnp=BovineHD0400024598
chr4:89897538-90123550	numsnp=77	length=226,013	state2,cn=1	8	startsnp=BovineHD0400024891	endsnp=BovineHD0400024967
chr5:10059086-10146200	numsnp=27	length=87,115	state2,cn=1	8	startsnp=BovineHD0500002862	endsnp=BovineHD0500002900
chr5:15699275-15766061	numsnp=18	length=66,787	state2,cn=1	8	startsnp=BovineHD0500004633	endsnp=BovineHD0500004649
chr5:20539855-20693242	numsnp=47	length=153,388	state2,cn=1	8	startsnp=BovineHD0500005933	endsnp=BovineHD0500005982
chr5:40780471-40879690	numsnp=30	length=99,220	state2,cn=1	8	startsnp=BovineHD0500011670	endsnp=BovineHD0500011695
chr5:51265925-51515066	numsnp=64	length=249,142	state2,cn=1	8	startsnp=BovineHD0500014753	endsnp=BovineHD0500014818
chr5:76653989-76845196	numsnp=27	length=191,208	state2,cn=1	8	startsnp=BovineHD0500021851	endsnp=Hapmap38822-BTA-25276
chr5:79225281-79322625	numsnp=29	length=97,345	state2,cn=1	8	startsnp=BovineHD0500022475	endsnp=BovineHD0500022499
chr5:99926052-100131606	numsnp=62	length=205,555	state2,cn=1	8	startsnp=BovineHD0500028592	endsnp=BovineHD0500028663
chr5:102778981-102925813	numsnp=61	length=146,833	state2,cn=1	8	startsnp=BovineHD0500029441	endsnp=BovineHD0500029505
chr5:119408760-119989587	numsnp=169	length=580,828	state2,cn=1	8	startsnp=ARS-BFGL-NGS-25107	endsnp=BovineHD0500035043
chr5:120373360-120577036	numsnp=75	length=203,677	state2,cn=1	8	startsnp=BovineHD0500035134	endsnp=BovineHD0500035210
chr5:120713309-120807822	numsnp=33	length=94,514	state2,cn=1	8	startsnp=BovineHD0500035260	endsnp=BovineHD0500035290
chr6:32896846-33131396	numsnp=91	length=234,551	state2,cn=1	8	startsnp=BovineHD0600009219	endsnp=BovineHD4100004393
chr6:38774879-39037376	numsnp=58	length=262,498	state2,cn=1	8	startsnp=BovineHD0600010739	endsnp=BovineHD0600010777
chr6:56226510-56531151	numsnp=83	length=304,642	state2,cn=1	8	startsnp=BovineHD0600015385	endsnp=BovineHD0600015460
chr6:72540759-72607087	numsnp=21	length=66,329	state2,cn=1	8	startsnp=BovineHD0600020146	endsnp=BovineHD0600020164
chr6:85022289-85153881	numsnp=32	length=131,593	state2,cn=1	8	startsnp=BovineHD0600023385	endsnp=BovineHD0600023419
chr6:106922320-107291500	numsnp=127	length=369,181	state2,cn=1	8	startsnp=BovineHD0600030056	endsnp=BovineHD0600030185
chr6:107646665-107738103	numsnp=25	length=91,439	state2,cn=1	8	startsnp=BovineHD0600030340	endsnp=BovineHD0600030361
chr6:108223493-108514208	numsnp=80	length=290,716	state2,cn=1	8	startsnp=BovineHD0600030493	endsnp=BovineHD0600030569
chr6:109019350-109844160	numsnp=169	length=824,811	state2,cn=1	8	startsnp=BovineHD0600030730	endsnp=BovineHD0600030892
chr7:10117929-10259897	numsnp=26	length=141,969	state2,cn=1	8	startsnp=BovineHD0700002653	endsnp=BovineHD0700002719
chr7:24107045-24286099	numsnp=54	length=179,055	state2,cn=1	8	startsnp=BovineHD0700006603	endsnp=BovineHD0700006654
chr7:39055287-39123656	numsnp=27	length=68,370	state2,cn=1	8	startsnp=BovineHD0700011327	endsnp=BovineHD0700011350
chr7:42516519-42861486	numsnp=88	length=344,968	state2,cn=1	8	startsnp=BovineHD0700012379	endsnp=BovineHD0700012465
chr7:47757812-47868633	numsnp=32	length=110,822	state2,cn=1	8	startsnp=BovineHD0700013812	endsnp=BovineHD0700013842
chr7:53536229-53744017	numsnp=88	length=207,789	state2,cn=1	8	startsnp=BovineHD0700015401	endsnp=BovineHD0700015488
chr7:53900821-53952520	numsnp=25	length=51,700	state2,cn=1	8	startsnp=BovineHD0700015547	endsnp=BovineHD0700015573
chr7:109853214-110014198	numsnp=26	length=160,985	state2,cn=1	8	startsnp=BovineHD0700034063	endsnp=BovineHD0700032114
chr8:26955095-27189062	numsnp=44	length=233,968	state2,cn=1	8	startsnp=BovineHD0800008141	endsnp=BovineHD0800008184
chr8:32326466-32450361	numsnp=29	length=123,896	state2,cn=1	8	startsnp=BovineHD0800009748	endsnp=BTB-00258020
chr8:53467071-53647856	numsnp=36	length=180,786	state2,cn=1	8	startsnp=BovineHD0800016068	endsnp=BovineHD0800016106
chr8:72396609-72523721	numsnp=42	length=127,113	state2,cn=1	8	startsnp=BovineHD0800021757	endsnp=BovineHD0800021798
chr9:30222172-30286871	numsnp=26	length=64,700	state2,cn=1	8	startsnp=BovineHD0900008192	endsnp=BovineHD0900008215
chr9:31246546-31381170	numsnp=33	length=134,625	state2,cn=1	8	startsnp=BovineHD0900008501	endsnp=BovineHD0900008531
chr9:36578334-36677939	numsnp=54	length=99,606	state2,cn=1	8	startsnp=ARS-BFGL-NGS-109026	endsnp=BovineHD0900010119
chr9:49923312-50021937	numsnp=26	length=98,626	state2,cn=1	8	startsnp=BTA-87887-no-rs	endsnp=BovineHD0900013797
chr9:64771671-64848827	numsnp=13	length=77,157	state2,cn=1	8	startsnp=BovineHD0900017780	endsnp=BovineHD0900017793
chr9:67167644-67238099	numsnp=17	length=70,456	state2,cn=1	8	startsnp=BovineHD0900018561	endsnp=BovineHD0900018579
chr9:79547348-79816568	numsnp=68	length=269,221	state2,cn=1	8	startsnp=BovineHD0900022087	endsnp=BovineHD0900022158
chr9:99626724-99722691	numsnp=40	length=95,968	state2,cn=1	8	startsnp=BovineHD0900028814	endsnp=BovineHD0900028853
chr10:9115839-9245774	numsnp=44	length=129,936	state2,cn=1	8	startsnp=BovineHD1000002978	endsnp=BovineHD1000003022
chr10:18736586-18878078	numsnp=28	length=141,493	state2,cn=1	8	startsnp=BovineHD1000006208	endsnp=BovineHD1000006231
chr10:48094040-48222661	numsnp=53	length=128,622	state2,cn=1	8	startsnp=BovineHD1000014455	endsnp=BovineHD1000014511
chr10:51319074-51567559	numsnp=49	length=248,486	state2,cn=1	8	startsnp=BovineHD1000015400	endsnp=BovineHD1000015445
chr10:68179385-68334411	numsnp=58	length=155,027	state2,cn=1	8	startsnp=BovineHD1000019532	endsnp=BovineHD1000019588
chr10:70750438-71065177	numsnp=104	length=314,740	state2,cn=1	8	startsnp=BovineHD1000020291	endsnp=BovineHD1000020398
chr10:78911500-79312084	numsnp=82	length=400,585	state2,cn=1	8	startsnp=BovineHD1000022589	endsnp=BovineHD1000022668
chr11:15003611-15140536	numsnp=26	length=136,926	state2,cn=1	8	startsnp=BovineHD1100031531	endsnp=BovineHD1100004842
chr11:21551925-21656279	numsnp=47	length=104,355	state2,cn=1	8	startsnp=BovineHD1100006465	endsnp=BovineHD1100006509
chr11:58267632-58419387	numsnp=35	length=151,756	state2,cn=1	8	startsnp=BovineHD1100016769	endsnp=ARS-BFGL-BAC-11747
chr11:65694352-65847914	numsnp=55	length=153,563	state2,cn=1	8	startsnp=BovineHD1100018553	endsnp=BovineHD1100018607
chr11:70865913-70986341	numsnp=30	length=120,429	state2,cn=1	8	startsnp=BovineHD1100020310	endsnp=BovineHD1100020339
chr11:84123312-84375559	numsnp=46	length=252,248	state2,cn=1	8	startsnp=BovineHD1100031324	endsnp=BovineHD1100024238
chr11:84648014-84849050	numsnp=71	length=201,037	state2,cn=1	8	startsnp=BovineHD1100024279	endsnp=BovineHD1100024345
chr11:103560890-104094452	numsnp=139	length=533,563	state2,cn=1	8	startsnp=BovineHD1100030138	endsnp=BovineHD1100030258
chr11:104543387-104685104	numsnp=38	length=141,718	state2,cn=1	8	startsnp=BovineHD1100030404	endsnp=BovineHD1100030438
chr11:105617642-105791903	numsnp=40	length=174,262	state2,cn=1	8	startsnp=BovineHD1100030678	endsnp=BovineHD1100030711
chr11:106196578-106459392	numsnp=78	length=262,815	state2,cn=1	8	startsnp=BovineHD1100030807	endsnp=BovineHD1100030884
chr11:106626509-106716196	numsnp=50	length=89,688	state2,cn=1	8	startsnp=BovineHD1100030970	endsnp=BovineHD1100031016
chr12:16097311-16187847	numsnp=31	length=90,537	state2,cn=1	8	startsnp=BovineHD1200004845	endsnp=BovineHD4100009396
chr12:25874687-26474785	numsnp=128	length=600,099	state2,cn=1	8	startsnp=BovineHD1200007812	endsnp=BovineHD1200007926
chr12:56149521-56201614	numsnp=15	length=52,094	state2,cn=1	8	startsnp=BTB-00499395	endsnp=BovineHD1200015555
chr12:60218974-60294640	numsnp=30	length=75,667	state2,cn=1	8	startsnp=BovineHD1200016508	endsnp=BovineHD1200016538
chr12:90496030-90725625	numsnp=70	length=229,596	state2,cn=1	8	startsnp=BovineHD1200026527	endsnp=BovineHD1200026586
chr13:14944963-15095027	numsnp=36	length=150,065	state2,cn=1	8	startsnp=BovineHD1300004248	endsnp=BovineHD1300004281
chr13:18056702-18175649	numsnp=45	length=118,948	state2,cn=1	8	startsnp=BovineHD1300005140	endsnp=BovineHD1300005181
chr13:20352649-20615821	numsnp=50	length=263,173	state2,cn=1	8	startsnp=BovineHD1300005925	endsnp=BTB-01233700
chr13:20937561-21042957	numsnp=50	length=105,397	state2,cn=1	8	startsnp=BovineHD1300006053	endsnp=BovineHD1300024548
chr14:1549928-2230450	numsnp=136	length=680,523	state2,cn=1	8	startsnp=BovineHD1400000178	endsnp=BovineHD4100010528
chr14:9529801-9605099	numsnp=26	length=75,299	state2,cn=1	8	startsnp=BovineHD1400002682	endsnp=BovineHD1400002699
chr14:42662145-42973247	numsnp=83	length=311,103	state2,cn=1	8	startsnp=BovineHD1400012139	endsnp=BovineHD1400012216
chr14:43914641-44150279	numsnp=63	length=235,639	state2,cn=1	8	startsnp=BovineHD1400012438	endsnp=BovineHD1400012497
chr14:57267677-57341767	numsnp=24	length=74,091	state2,cn=1	8	startsnp=Hapmap33418-BTC-014033	endsnp=BovineHD1400015974
chr14:58323232-58438290	numsnp=28	length=115,059	state2,cn=1	8	startsnp=BovineHD1400016196	endsnp=BovineHD1400016222
chr14:59996266-60079018	numsnp=27	length=82,753	state2,cn=1	8	startsnp=BovineHD1400016625	endsnp=BovineHD1400016650
chr14:62627737-62689223	numsnp=22	length=61,487	state2,cn=1	8	startsnp=BovineHD1400017419	endsnp=BovineHD1400017438
chr14:62782571-62935267	numsnp=31	length=152,697	state2,cn=1	8	startsnp=BovineHD1400017458	endsnp=BovineHD1400017486
chr14:66819485-67489095	numsnp=161	length=669,611	state2,cn=1	8	startsnp=ARS-BFGL-NGS-115036	endsnp=BovineHD1400018846
chr14:71793738-71928766	numsnp=38	length=135,029	state2,cn=1	8	startsnp=ARS-BFGL-NGS-60065	endsnp=BovineHD1400020157
chr14:83547949-83615008	numsnp=33	length=67,060	state2,cn=1	8	startsnp=BovineHD1400023602	endsnp=BovineHD1400023633
chr15:20463284-20698954	numsnp=92	length=235,671	state2,cn=1	8	startsnp=BovineHD1500005171	endsnp=BovineHD1500005260
chr15:43191872-43308530	numsnp=30	length=116,659	state2,cn=1	8	startsnp=BovineHD1500012012	endsnp=Hapmap46538-BTA-88332
chr15:47873132-48068620	numsnp=32	length=195,489	state2,cn=1	8	startsnp=BovineHD1500013731	endsnp=Hapmap55024-rs29015792
chr15:48542332-48642911	numsnp=48	length=100,580	state2,cn=1	8	startsnp=BovineHD1500013952	endsnp=BovineHD1500025189
chr15:63192693-63281076	numsnp=29	length=88,384	state2,cn=1	8	startsnp=BovineHD1500025253	endsnp=BTB-01280741
chr15:84973939-85224354	numsnp=72	length=250,416	state2,cn=1	8	startsnp=BovineHD1500024919	endsnp=BovineHD1500024984
chr16:26979772-27154383	numsnp=65	length=174,612	state2,cn=1	8	startsnp=BovineHD1600007454	endsnp=BovineHD1600007515
chr16:38360235-38530062	numsnp=40	length=169,828	state2,cn=1	8	startsnp=BovineHD1600011013	endsnp=BovineHD1600011049
chr16:38783050-38924807	numsnp=55	length=141,758	state2,cn=1	8	startsnp=BovineHD1600011112	endsnp=BovineHD1600011165
chr16:62689142-62742829	numsnp=11	length=53,688	state2,cn=1	8	startsnp=BovineHD1600017579	endsnp=BovineHD1600017586
chr16:68897723-69088226	numsnp=90	length=190,504	state2,cn=1	8	startsnp=BovineHD1600019513	endsnp=BovineHD1600019603
chr16:70814352-70924028	numsnp=24	length=109,677	state2,cn=1	8	startsnp=BovineHD1600020126	endsnp=BovineHD1600020149
chr16:71092127-71180683	numsnp=23	length=88,557	state2,cn=1	8	startsnp=BovineHD1600020185	endsnp=BovineHD1600020209
chr16:78399474-78528854	numsnp=57	length=129,381	state2,cn=1	8	startsnp=BovineHD4100012769	endsnp=BovineHD1600022855
chr16:80188616-80273049	numsnp=35	length=84,434	state2,cn=1	8	startsnp=BovineHD1600023394	endsnp=BovineHD1600023432
chr17:20704416-20965875	numsnp=77	length=261,460	state2,cn=1	8	startsnp=BovineHD1700005993	endsnp=BovineHD1700006062
chr17:26101559-26166694	numsnp=23	length=65,136	state2,cn=1	8	startsnp=BovineHD1700007357	endsnp=BovineHD1700007390
chr17:30178383-30313751	numsnp=24	length=135,369	state2,cn=1	8	startsnp=BovineHD1700008512	endsnp=BovineHD1700008534
chr17:73354100-73516198	numsnp=49	length=162,099	state2,cn=1	8	startsnp=BovineHD1700021435	endsnp=BovineHD1700021477
chr17:73569170-73858134	numsnp=96	length=288,965	state2,cn=1	8	startsnp=BovineHD1700021492	endsnp=BovineHD1700021585
chr17:74555985-75148791	numsnp=126	length=592,807	state2,cn=1	8	startsnp=BovineHD1700021787	endsnp=BovineHD1700022147
chr18:21665648-21907413	numsnp=52	length=241,766	state2,cn=1	8	startsnp=BovineHD1800006681	endsnp=BovineHD1800006726
chr18:38688096-38893878	numsnp=29	length=205,783	state2,cn=1	8	startsnp=BTA-43161-no-rs	endsnp=BovineHD1800011534
chr19:12860683-13002657	numsnp=38	length=141,975	state2,cn=1	8	startsnp=BovineHD4100013944	endsnp=BovineHD1900003435
chr19:48181378-48305042	numsnp=31	length=123,665	state2,cn=1	8	startsnp=BovineHD1900013391	endsnp=BovineHD1900013418
chr20:8468353-8757679	numsnp=61	length=289,327	state2,cn=1	8	startsnp=BovineHD2000002712	endsnp=Hapmap25538-BTA-134885
chr20:26854463-26960799	numsnp=21	length=106,337	state2,cn=1	8	startsnp=BovineHD2000007977	endsnp=BovineHD2000007995
chr20:60599638-60706699	numsnp=31	length=107,062	state2,cn=1	8	startsnp=BovineHD2000017009	endsnp=BovineHD2000017039
chr20:70875830-71591346	numsnp=184	length=715,517	state2,cn=1	8	startsnp=BovineHD2000020746	endsnp=BovineHD2000020922
chr21:7064177-7209670	numsnp=66	length=145,494	state2,cn=1	8	startsnp=BovineHD2100001493	endsnp=BovineHD2100001560
chr21:69197797-69382683	numsnp=50	length=184,887	state2,cn=1	8	startsnp=BovineHD2100020199	endsnp=BovineHD2100020249
chr21:70221263-70421120	numsnp=69	length=199,858	state2,cn=1	8	startsnp=BovineHD2100020518	endsnp=BovineHD2100020579
chr21:70701216-70913914	numsnp=62	length=212,699	state2,cn=1	8	startsnp=BovineHD2100020703	endsnp=BovineHD2100020749
chr22:44160849-44355284	numsnp=43	length=194,436	state2,cn=1	8	startsnp=BovineHD2200012779	endsnp=BovineHD2200012817
chr22:59964685-60220816	numsnp=82	length=256,132	state2,cn=1	8	startsnp=BovineHD2200017401	endsnp=BovineHD2200017476
chr22:60399564-61213654	numsnp=278	length=814,091	state2,cn=1	8	startsnp=BovineHD2200017568	endsnp=BovineHD2200017824
chr23:2927428-3182321	numsnp=72	length=254,894	state2,cn=1	8	startsnp=BovineHD2300000573	endsnp=BovineHD2300000642
chr23:16298875-16381789	numsnp=22	length=82,915	state2,cn=1	8	startsnp=BovineHD2300004188	endsnp=BovineHD2300004204
chr23:18415866-18611522	numsnp=42	length=195,657	state2,cn=1	8	startsnp=BovineHD2300004698	endsnp=BovineHD2300015594
chr23:50186819-50331028	numsnp=51	length=144,210	state2,cn=1	8	startsnp=BovineHD2300014635	endsnp=BovineHD2300014686
chr23:51830401-52015979	numsnp=52	length=185,579	state2,cn=1	8	startsnp=BovineHD2300015064	endsnp=BovineHD2300015109
chr25:271849-659538	numsnp=98	length=387,690	state2,cn=1	8	startsnp=BovineHD2500000048	endsnp=BovineHD2500000133
chr25:766584-1214553	numsnp=120	length=447,970	state2,cn=1	8	startsnp=BovineHD2500000180	endsnp=BovineHD2500000273
chr25:1712523-2011350	numsnp=74	length=298,828	state2,cn=1	8	startsnp=ARS-BFGL-NGS-15062	endsnp=BovineHD2500000406
chr25:19373377-19581064	numsnp=42	length=207,688	state2,cn=1	8	startsnp=BovineHD2500005390	endsnp=ARS-BFGL-NGS-31542
chr25:39733401-39807389	numsnp=29	length=73,989	state2,cn=1	8	startsnp=BovineHD2500011086	endsnp=BovineHD2500011108
chr25:41129839-41374004	numsnp=71	length=244,166	state2,cn=1	8	startsnp=BovineHD4100017542	endsnp=BovineHD4100017560
chr25:41596286-42370881	numsnp=209	length=774,596	state2,cn=1	8	startsnp=ARS-BFGL-NGS-30598	endsnp=BovineHD2500011869
chr25:42492384-42743799	numsnp=71	length=251,416	state2,cn=1	8	startsnp=BovineHD2500011891	endsnp=BovineHD2500011958
chr26:20561955-20638570	numsnp=18	length=76,616	state2,cn=1	8	startsnp=BovineHD2600005334	endsnp=BovineHD2600005347
chr26:50816998-51291371	numsnp=122	length=474,374	state2,cn=1	8	startsnp=BovineHD2600014694	endsnp=BovineHD2600014810
chr26:51460945-51680135	numsnp=76	length=219,191	state2,cn=1	8	startsnp=ARS-BFGL-NGS-101725	endsnp=ARS-BFGL-NGS-17431
chr28:19549475-19674311	numsnp=39	length=124,837	state2,cn=1	8	startsnp=BovineHD2800005295	endsnp=BovineHD2800005334
chr28:24885275-25216073	numsnp=59	length=330,799	state2,cn=1	8	startsnp=BovineHD2800006444	endsnp=BovineHD2800006493
chr29:4988350-5084131	numsnp=49	length=95,782	state2,cn=1	8	startsnp=BovineHD2900001396	endsnp=BovineHD2900001443
chr29:49007648-49140640	numsnp=24	length=132,993	state2,cn=1	8	startsnp=BovineHD2900014487	endsnp=BovineHD2900015619
chr29:49182244-49554813	numsnp=74	length=372,570	state2,cn=1	8	startsnp=BovineHD2900014514	endsnp=BovineHD2900014591
chr29:49997333-50207785	numsnp=33	length=210,453	state2,cn=1	8	startsnp=BovineHD2900014664	endsnp=BovineHD2900014695
chr29:50536728-50836801	numsnp=66	length=300,074	state2,cn=1	8	startsnp=BovineHD2900014765	endsnp=BovineHD2900014828
chr9:10049-301768	numsnp=33	length=291,720	state5,cn=3	8	startsnp=BovineHD0900031325	endsnp=BovineHD0900000053
chr12:70645065-70868927	numsnp=17	length=223,863	state5,cn=3	8	startsnp=BovineHD1200019402	endsnp=BovineHD1200019452
chr14:62692876-62769117	numsnp=18	length=76,242	state5,cn=3	8	startsnp=BovineHD1400017439	endsnp=BovineHD1400017455
chr23:34779270-34866601	numsnp=17	length=87,332	state5,cn=3	8	startsnp=BovineHD2300010180	endsnp=BovineHD2300010200
chr29:38567737-39269818	numsnp=70	length=702,082	state5,cn=3	8	startsnp=BovineHD2900011663	endsnp=BovineHD2900011832
chr6:6502610-6902973	numsnp=78	length=400,364	state6,cn=4	8	startsnp=BovineHD0600001420	endsnp=BovineHD0600001493
chr1:93730576-93819471	numsnp=10	length=88,896	state1,cn=0	9	startsnp=BovineHD0100047110	endsnp=BovineHD0100026605
chr10:23180741-23413050	numsnp=10	length=232,310	state1,cn=0	9	startsnp=BovineHD1000007626	endsnp=BovineHD1000007691
chr12:32054331-32162911	numsnp=13	length=108,581	state1,cn=0	9	startsnp=BovineHD1200009422	endsnp=BovineHD1200009451
chr12:70392108-70620665	numsnp=24	length=228,558	state1,cn=0	9	startsnp=BovineHD1200019356	endsnp=BovineHD1200019397
chr12:74840021-75193156	numsnp=18	length=353,136	state1,cn=0	9	startsnp=BovineHD1200020836	endsnp=BovineHD1200020930
chr13:170016-329928	numsnp=15	length=159,913	state1,cn=0	9	startsnp=BovineHD1300000020	endsnp=BovineHD1300000050
chr16:5676289-5789669	numsnp=27	length=113,381	state1,cn=0	9	startsnp=BovineHD1600001604	endsnp=BovineHD1600001649
chr16:8414004-8486467	numsnp=12	length=72,464	state1,cn=0	9	startsnp=BTA-26788-no-rs	endsnp=BTA-88251-no-rs
chr1:20033381-20093504	numsnp=23	length=60,124	state2,cn=1	9	startsnp=BovineHD0100005949	endsnp=BovineHD0100005969
chr1:20670704-20792484	numsnp=43	length=121,781	state2,cn=1	9	startsnp=BovineHD0100006120	endsnp=BovineHD0100006158
chr1:27986124-28135135	numsnp=41	length=149,012	state2,cn=1	9	startsnp=BovineHD0100008325	endsnp=BovineHD0100008364
chr1:34985622-35247683	numsnp=84	length=262,062	state2,cn=1	9	startsnp=BovineHD0100010027	endsnp=BovineHD0100010117
chr1:37808819-37945685	numsnp=67	length=136,867	state2,cn=1	9	startsnp=BovineHD0100010876	endsnp=BovineHD0100010943
chr1:59946118-60260551	numsnp=83	length=314,434	state2,cn=1	9	startsnp=BovineHD0100016958	endsnp=BovineHD0100017031
chr1:70875107-70968244	numsnp=22	length=93,138	state2,cn=1	9	startsnp=BovineHD0100020286	endsnp=BovineHD0100020309
chr1:72115021-72387471	numsnp=42	length=272,451	state2,cn=1	9	startsnp=BovineHD0100020680	endsnp=BovineHD0100020714
chr1:72759693-72931620	numsnp=41	length=171,928	state2,cn=1	9	startsnp=BovineHD0100020842	endsnp=BovineHD0100020881
chr1:76656122-76837310	numsnp=68	length=181,189	state2,cn=1	9	startsnp=BovineHD0100022081	endsnp=BovineHD0100022153
chr1:84617946-84834481	numsnp=48	length=216,536	state2,cn=1	9	startsnp=BovineHD0100024241	endsnp=BovineHD0100024286
chr1:133513887-133616398	numsnp=25	length=102,512	state2,cn=1	9	startsnp=BovineHD0100038029	endsnp=BovineHD0100038049
chr1:147301032-147410842	numsnp=48	length=109,811	state2,cn=1	9	startsnp=BovineHD0100042579	endsnp=BovineHD0100042628
chr1:157148992-157273077	numsnp=45	length=124,086	state2,cn=1	9	startsnp=BovineHD0100045949	endsnp=BovineHD0100045991
chr2:24714894-24891260	numsnp=35	length=176,367	state2,cn=1	9	startsnp=BovineHD0200007107	endsnp=BovineHD0200007154
chr2:31238054-31535313	numsnp=108	length=297,260	state2,cn=1	9	startsnp=BovineHD0200009241	endsnp=BovineHD0200009338
chr2:36939833-37107860	numsnp=47	length=168,028	state2,cn=1	9	startsnp=BovineHD0200010822	endsnp=BovineHD0200040575
chr2:48029798-48176523	numsnp=32	length=146,726	state2,cn=1	9	startsnp=BovineHD0200013919	endsnp=BovineHD0200013949
chr2:48306020-48448951	numsnp=37	length=142,932	state2,cn=1	9	startsnp=BovineHD4100001194	endsnp=BovineHD0200014012
chr2:51330712-51397309	numsnp=15	length=66,598	state2,cn=1	9	startsnp=BovineHD0200014720	endsnp=BovineHD0200014735
chr2:101941462-102126882	numsnp=36	length=185,421	state2,cn=1	9	startsnp=BovineHD0200029285	endsnp=BovineHD0200029330
chr3:604022-797529	numsnp=47	length=193,508	state2,cn=1	9	startsnp=BovineHD0300000127	endsnp=BovineHD0300000172
chr3:15134238-15320333	numsnp=63	length=186,096	state2,cn=1	9	startsnp=BovineHD0300004928	endsnp=BovineHD0300004992
chr3:29045330-29111048	numsnp=18	length=65,719	state2,cn=1	9	startsnp=BovineHD0300009190	endsnp=BovineHD0300009207
chr3:43462907-43537606	numsnp=43	length=74,700	state2,cn=1	9	startsnp=BovineHD0300013217	endsnp=BovineHD0300013262
chr3:51481520-51574237	numsnp=34	length=92,718	state2,cn=1	9	startsnp=BovineHD0300015571	endsnp=BovineHD0300015602
chr3:79670682-79765949	numsnp=32	length=95,268	state2,cn=1	9	startsnp=BovineHD0300022959	endsnp=BovineHD0300022989
chr3:83491965-83663765	numsnp=43	length=171,801	state2,cn=1	9	startsnp=BovineHD0300023894	endsnp=BovineHD0300023928
chr3:94416488-94515232	numsnp=24	length=98,745	state2,cn=1	9	startsnp=BovineHD0300027205	endsnp=BovineHD0300036315
chr3:98358893-98552988	numsnp=77	length=194,096	state2,cn=1	9	startsnp=BovineHD0300028257	endsnp=INRA-437
chr3:118071660-118137556	numsnp=19	length=65,897	state2,cn=1	9	startsnp=BovineHD0300034431	endsnp=BovineHD0300034447
chr3:120556310-121141746	numsnp=154	length=585,437	state2,cn=1	9	startsnp=BovineHD0300035251	endsnp=BovineHD0300035391
chr4:5733619-5867735	numsnp=19	length=134,117	state2,cn=1	9	startsnp=BovineHD0400001639	endsnp=BovineHD0400001662
chr4:43669842-43892016	numsnp=40	length=222,175	state2,cn=1	9	startsnp=BovineHD0400011957	endsnp=BovineHD0400011995
chr4:48672797-48911944	numsnp=51	length=239,148	state2,cn=1	9	startsnp=BovineHD0400013379	endsnp=BovineHD0400013427
chr4:51318774-51371784	numsnp=12	length=53,011	state2,cn=1	9	startsnp=BovineHD0400014199	endsnp=BovineHD0400014207
chr4:63859455-64044409	numsnp=43	length=184,955	state2,cn=1	9	startsnp=BovineHD0400017487	endsnp=BovineHD0400017529
chr4:72375370-72513244	numsnp=29	length=137,875	state2,cn=1	9	startsnp=BovineHD0400020051	endsnp=BovineHD0400020079
chr4:84118706-84241119	numsnp=22	length=122,414	state2,cn=1	9	startsnp=BTB-01142924	endsnp=BovineHD0400023322
chr4:88769527-88837310	numsnp=20	length=67,784	state2,cn=1	9	startsnp=BovineHD0400024582	endsnp=BovineHD0400024598
chr4:89897538-90035217	numsnp=42	length=137,680	state2,cn=1	9	startsnp=BovineHD0400024891	endsnp=BovineHD0400035513
chr4:95822911-95974974	numsnp=33	length=152,064	state2,cn=1	9	startsnp=BovineHD0400026683	endsnp=BovineHD0400026716
chr5:16273233-16508110	numsnp=52	length=234,878	state2,cn=1	9	startsnp=BovineHD0500004794	endsnp=BovineHD0500004847
chr5:40780471-40879690	numsnp=30	length=99,220	state2,cn=1	9	startsnp=BovineHD0500011670	endsnp=BovineHD0500011695
chr5:41990361-42154122	numsnp=36	length=163,762	state2,cn=1	9	startsnp=BovineHD0500011998	endsnp=BovineHD0500012038
chr5:51265925-51515066	numsnp=64	length=249,142	state2,cn=1	9	startsnp=BovineHD0500014753	endsnp=BovineHD0500014818
chr5:76582910-76758621	numsnp=23	length=175,712	state2,cn=1	9	startsnp=BovineHD0500021845	endsnp=BovineHD0500021862
chr5:79159916-79322625	numsnp=33	length=162,710	state2,cn=1	9	startsnp=BovineHD0500022469	endsnp=BovineHD0500022499
chr5:81849623-82058992	numsnp=39	length=209,370	state2,cn=1	9	startsnp=BovineHD0500023134	endsnp=BovineHD0500023177
chr5:102778981-102925813	numsnp=61	length=146,833	state2,cn=1	9	startsnp=BovineHD0500029441	endsnp=BovineHD0500029505
chr5:119408760-119593950	numsnp=61	length=185,191	state2,cn=1	9	startsnp=ARS-BFGL-NGS-25107	endsnp=ARS-BFGL-NGS-18125
chr5:120329153-120420253	numsnp=41	length=91,101	state2,cn=1	9	startsnp=ARS-BFGL-NGS-104946	endsnp=ARS-BFGL-NGS-104504
chr6:27546505-27656754	numsnp=36	length=110,250	state2,cn=1	9	startsnp=BovineHD0600007608	endsnp=BovineHD0600007645
chr6:38825835-39037376	numsnp=45	length=211,542	state2,cn=1	9	startsnp=Hapmap27083-BTC-041166	endsnp=BovineHD0600010777
chr6:56226510-56397749	numsnp=46	length=171,240	state2,cn=1	9	startsnp=BovineHD0600015385	endsnp=BovineHD0600015426
chr6:68891130-68961525	numsnp=22	length=70,396	state2,cn=1	9	startsnp=BovineHD0600019016	endsnp=BovineHD0600019037
chr6:85041321-85205890	numsnp=48	length=164,570	state2,cn=1	9	startsnp=BovineHD0600023390	endsnp=BovineHD0600023439
chr6:103414804-103467969	numsnp=24	length=53,166	state2,cn=1	9	startsnp=BovineHD0600028780	endsnp=BovineHD0600028799
chr6:107214281-107295187	numsnp=21	length=80,907	state2,cn=1	9	startsnp=ARS-BFGL-NGS-113112	endsnp=BovineHD0600030186
chr6:109019350-109844160	numsnp=169	length=824,811	state2,cn=1	9	startsnp=BovineHD0600030730	endsnp=BovineHD0600030892
chr6:119400534-119454666	numsnp=14	length=54,133	state2,cn=1	9	startsnp=BovineHD0600034219	endsnp=BovineHD0600034414
chr7:10117929-10259897	numsnp=26	length=141,969	state2,cn=1	9	startsnp=BovineHD0700002653	endsnp=BovineHD0700002719
chr7:24107045-24286099	numsnp=54	length=179,055	state2,cn=1	9	startsnp=BovineHD0700006603	endsnp=BovineHD0700006654
chr7:33128807-33293487	numsnp=38	length=164,681	state2,cn=1	9	startsnp=BovineHD0700009495	endsnp=BovineHD0700009532
chr7:38967158-39129491	numsnp=62	length=162,334	state2,cn=1	9	startsnp=BTB-01364730	endsnp=BovineHD0700011351
chr7:42516519-42670668	numsnp=48	length=154,150	state2,cn=1	9	startsnp=BovineHD0700012379	endsnp=BovineHD0700012424
chr7:43228786-43330896	numsnp=26	length=102,111	state2,cn=1	9	startsnp=BovineHD0700012542	endsnp=BovineHD0700012567
chr7:47757812-47930150	numsnp=48	length=172,339	state2,cn=1	9	startsnp=BovineHD0700013812	endsnp=BovineHD0700013858
chr7:53536229-53641290	numsnp=60	length=105,062	state2,cn=1	9	startsnp=BovineHD0700015401	endsnp=BovineHD0700015465
chr7:110675360-110771673	numsnp=39	length=96,314	state2,cn=1	9	startsnp=BovineHD0700032276	endsnp=BovineHD0700032312
chr8:26955095-27159357	numsnp=37	length=204,263	state2,cn=1	9	startsnp=BovineHD0800008141	endsnp=BovineHD0800008176
chr8:32326466-32450361	numsnp=29	length=123,896	state2,cn=1	9	startsnp=BovineHD0800009748	endsnp=BTB-00258020
chr8:41479170-41544668	numsnp=25	length=65,499	state2,cn=1	9	startsnp=BovineHD0800012347	endsnp=BovineHD0800012370
chr8:53486832-53590531	numsnp=21	length=103,700	state2,cn=1	9	startsnp=BovineHD0800016070	endsnp=BovineHD0800016093
chr8:61634559-61848642	numsnp=60	length=214,084	state2,cn=1	9	startsnp=BovineHD0800018424	endsnp=BovineHD0800018481
chr8:72420836-72523721	numsnp=32	length=102,886	state2,cn=1	9	startsnp=BovineHD0800021768	endsnp=BovineHD0800021798
chr9:9703050-9775082	numsnp=20	length=72,033	state2,cn=1	9	startsnp=BovineHD0900002374	endsnp=BovineHD0900002394
chr9:31246546-31420165	numsnp=57	length=173,620	state2,cn=1	9	startsnp=BovineHD0900008501	endsnp=BovineHD0900008555
chr9:36574394-36679156	numsnp=57	length=104,763	state2,cn=1	9	startsnp=BovineHD0900010062	endsnp=BovineHD0900010120
chr9:49931663-50021937	numsnp=23	length=90,275	state2,cn=1	9	startsnp=BovineHD0900013777	endsnp=BovineHD0900013797
chr9:64771671-64848827	numsnp=13	length=77,157	state2,cn=1	9	startsnp=BovineHD0900017780	endsnp=BovineHD0900017793
chr9:67167644-67238099	numsnp=17	length=70,456	state2,cn=1	9	startsnp=BovineHD0900018561	endsnp=BovineHD0900018579
chr9:70501867-70662914	numsnp=71	length=161,048	state2,cn=1	9	startsnp=BovineHD0900019502	endsnp=BovineHD0900019571
chr9:79553729-79816568	numsnp=63	length=262,840	state2,cn=1	9	startsnp=BovineHD0900022092	endsnp=BovineHD0900022158
chr10:9175612-9245774	numsnp=30	length=70,163	state2,cn=1	9	startsnp=BovineHD1000002992	endsnp=BovineHD1000003022
chr10:18736586-18878078	numsnp=28	length=141,493	state2,cn=1	9	startsnp=BovineHD1000006208	endsnp=BovineHD1000006231
chr10:38355594-38439355	numsnp=20	length=83,762	state2,cn=1	9	startsnp=BovineHD1000011871	endsnp=BovineHD1000011888
chr10:41283859-41541477	numsnp=59	length=257,619	state2,cn=1	9	startsnp=BovineHD1000012629	endsnp=BovineHD1000012678
chr10:48150692-48226400	numsnp=38	length=75,709	state2,cn=1	9	startsnp=BovineHD1000014472	endsnp=BovineHD1000014512
chr10:51305855-51567559	numsnp=52	length=261,705	state2,cn=1	9	startsnp=BovineHD1000015398	endsnp=BovineHD1000015445
chr10:68179385-68329747	numsnp=57	length=150,363	state2,cn=1	9	startsnp=BovineHD1000019532	endsnp=BovineHD1000019587
chr10:70801482-70878349	numsnp=16	length=76,868	state2,cn=1	9	startsnp=BovineHD1000020304	endsnp=BovineHD1000020317
chr10:78911500-79312084	numsnp=82	length=400,585	state2,cn=1	9	startsnp=BovineHD1000022589	endsnp=BovineHD1000022668
chr11:15003611-15140536	numsnp=26	length=136,926	state2,cn=1	9	startsnp=BovineHD1100031531	endsnp=BovineHD1100004842
chr11:21559452-21656279	numsnp=44	length=96,828	state2,cn=1	9	startsnp=BovineHD1100006467	endsnp=BovineHD1100006509
chr11:30457355-30558447	numsnp=24	length=101,093	state2,cn=1	9	startsnp=BovineHD1100009095	endsnp=BovineHD4100008688
chr11:31911599-31984222	numsnp=25	length=72,624	state2,cn=1	9	startsnp=BovineHD1100009585	endsnp=BovineHD1100009609
chr11:58267632-58419387	numsnp=35	length=151,756	state2,cn=1	9	startsnp=BovineHD1100016769	endsnp=ARS-BFGL-BAC-11747
chr11:70865913-70986341	numsnp=30	length=120,429	state2,cn=1	9	startsnp=BovineHD1100020310	endsnp=BovineHD1100020339
chr11:75098286-75248626	numsnp=60	length=150,341	state2,cn=1	9	startsnp=BovineHD1100021397	endsnp=BovineHD1100021458
chr11:103644879-104094452	numsnp=116	length=449,574	state2,cn=1	9	startsnp=BovineHD1100030159	endsnp=BovineHD1100030258
chr11:104571309-104685104	numsnp=33	length=113,796	state2,cn=1	9	startsnp=BovineHD1100030410	endsnp=BovineHD1100030438
chr11:105617642-105743614	numsnp=31	length=125,973	state2,cn=1	9	startsnp=BovineHD1100030678	endsnp=BovineHD1100030702
chr11:106196578-106459392	numsnp=78	length=262,815	state2,cn=1	9	startsnp=BovineHD1100030807	endsnp=BovineHD1100030884
chr11:106626509-106749016	numsnp=68	length=122,508	state2,cn=1	9	startsnp=BovineHD1100030970	endsnp=BovineHD1100031034
chr12:16097311-16178137	numsnp=29	length=80,827	state2,cn=1	9	startsnp=BovineHD1200004845	endsnp=BovineHD1200004870
chr12:28342958-28449408	numsnp=26	length=106,451	state2,cn=1	9	startsnp=BovineHD1200008422	endsnp=BovineHD1200008439
chr12:60218974-60287659	numsnp=28	length=68,686	state2,cn=1	9	startsnp=BovineHD1200016508	endsnp=BovineHD1200016536
chr12:72455520-72512295	numsnp=27	length=56,776	state2,cn=1	9	startsnp=ARS-BFGL-NGS-2370	endsnp=BovineHD1200020005
chr12:80924626-80986441	numsnp=34	length=61,816	state2,cn=1	9	startsnp=BovineHD1200023152	endsnp=BovineHD1200023184
chr12:84445319-84513201	numsnp=21	length=67,883	state2,cn=1	9	startsnp=BovineHD1200024478	endsnp=BovineHD1200024495
chr12:90496030-90725625	numsnp=70	length=229,596	state2,cn=1	9	startsnp=BovineHD1200026527	endsnp=BovineHD1200026586
chr13:20352649-20615821	numsnp=50	length=263,173	state2,cn=1	9	startsnp=BovineHD1300005925	endsnp=BTB-01233700
chr13:20965563-21119567	numsnp=72	length=154,005	state2,cn=1	9	startsnp=BovineHD1300006064	endsnp=BovineHD1300006134
chr13:23215544-23402797	numsnp=33	length=187,254	state2,cn=1	9	startsnp=BovineHD1300006760	endsnp=BovineHD1300006796
chr13:36782813-36833775	numsnp=18	length=50,963	state2,cn=1	9	startsnp=Hapmap25918-BTA-163236	endsnp=BovineHD1300010660
chr14:1549928-1699042	numsnp=31	length=149,115	state2,cn=1	9	startsnp=BovineHD1400000178	endsnp=BovineHD1400000210
chr14:2006872-2089613	numsnp=17	length=82,742	state2,cn=1	9	startsnp=BovineHD1400000273	endsnp=BovineHD1400000290
chr14:2790501-3195864	numsnp=114	length=405,364	state2,cn=1	9	startsnp=BovineHD4100010557	endsnp=BovineHD1400000563
chr14:9529801-9605099	numsnp=26	length=75,299	state2,cn=1	9	startsnp=BovineHD1400002682	endsnp=BovineHD1400002699
chr14:44047994-44144717	numsnp=31	length=96,724	state2,cn=1	9	startsnp=BovineHD1400012467	endsnp=BovineHD1400012494
chr14:59996266-60079018	numsnp=27	length=82,753	state2,cn=1	9	startsnp=BovineHD1400016625	endsnp=BovineHD1400016650
chr14:62627737-62710391	numsnp=27	length=82,655	state2,cn=1	9	startsnp=BovineHD1400017419	endsnp=BovineHD1400017443
chr14:62782571-63041365	numsnp=58	length=258,795	state2,cn=1	9	startsnp=BovineHD1400017458	endsnp=BovineHD1400017509
chr14:66783251-67525419	numsnp=176	length=742,169	state2,cn=1	9	startsnp=BovineHD1400018680	endsnp=BovineHD1400018854
chr14:71793738-71928766	numsnp=38	length=135,029	state2,cn=1	9	startsnp=ARS-BFGL-NGS-60065	endsnp=BovineHD1400020157
chr14:83547949-83615008	numsnp=33	length=67,060	state2,cn=1	9	startsnp=BovineHD1400023602	endsnp=BovineHD1400023633
chr15:3426781-3633274	numsnp=52	length=206,494	state2,cn=1	9	startsnp=BovineHD1500000780	endsnp=BovineHD1500000823
chr15:17050575-17153857	numsnp=19	length=103,283	state2,cn=1	9	startsnp=BovineHD1500004349	endsnp=BovineHD1500004365
chr15:20645813-20762546	numsnp=46	length=116,734	state2,cn=1	9	startsnp=BovineHD1500005236	endsnp=BovineHD1500005280
chr15:43191872-43308530	numsnp=30	length=116,659	state2,cn=1	9	startsnp=BovineHD1500012012	endsnp=Hapmap46538-BTA-88332
chr15:43779412-43880771	numsnp=31	length=101,360	state2,cn=1	9	startsnp=BTB-00596868	endsnp=BovineHD1500012184
chr15:47814022-47998053	numsnp=23	length=184,032	state2,cn=1	9	startsnp=BovineHD1500013722	endsnp=BovineHD1500013771
chr15:48047397-48251926	numsnp=58	length=204,530	state2,cn=1	9	startsnp=BovineHD1500013779	endsnp=BovineHD1500013841
chr15:63192693-63281076	numsnp=29	length=88,384	state2,cn=1	9	startsnp=BovineHD1500025253	endsnp=BTB-01280741
chr15:64314134-64432293	numsnp=35	length=118,160	state2,cn=1	9	startsnp=BovineHD1500018415	endsnp=BovineHD1500025940
chr15:80157078-80329011	numsnp=36	length=171,934	state2,cn=1	9	startsnp=BovineHD1500023367	endsnp=BovineHD1500023413
chr15:84915641-85224354	numsnp=84	length=308,714	state2,cn=1	9	startsnp=BovineHD1500024906	endsnp=BovineHD1500024984
chr16:26963625-27154383	numsnp=77	length=190,759	state2,cn=1	9	startsnp=BovineHD1600007442	endsnp=BovineHD1600007515
chr16:31162715-31255320	numsnp=22	length=92,606	state2,cn=1	9	startsnp=Hapmap50900-BTA-16300	endsnp=BTB-01634281
chr16:38371856-38450491	numsnp=24	length=78,636	state2,cn=1	9	startsnp=BovineHD1600011020	endsnp=BovineHD1600011040
chr16:62661510-62742829	numsnp=16	length=81,320	state2,cn=1	9	startsnp=BovineHD1600017575	endsnp=BovineHD1600017586
chr16:68913053-69088226	numsnp=77	length=175,174	state2,cn=1	9	startsnp=BovineHD1600019529	endsnp=BovineHD1600019603
chr16:70814352-70924028	numsnp=24	length=109,677	state2,cn=1	9	startsnp=BovineHD1600020126	endsnp=BovineHD1600020149
chr16:71092127-71180683	numsnp=23	length=88,557	state2,cn=1	9	startsnp=BovineHD1600020185	endsnp=BovineHD1600020209
chr17:6932461-7112254	numsnp=57	length=179,794	state2,cn=1	9	startsnp=BovineHD1700002006	endsnp=BovineHD1700002061
chr17:30178383-30313751	numsnp=24	length=135,369	state2,cn=1	9	startsnp=BovineHD1700008512	endsnp=BovineHD1700008534
chr17:73354100-73516198	numsnp=49	length=162,099	state2,cn=1	9	startsnp=BovineHD1700021435	endsnp=BovineHD1700021477
chr17:73569170-73858134	numsnp=96	length=288,965	state2,cn=1	9	startsnp=BovineHD1700021492	endsnp=BovineHD1700021585
chr17:74794960-75148791	numsnp=63	length=353,832	state2,cn=1	9	startsnp=BovineHD1700021845	endsnp=BovineHD1700022147
chr18:21686981-21805397	numsnp=25	length=118,417	state2,cn=1	9	startsnp=BovineHD1800019581	endsnp=BovineHD1800006706
chr18:38573367-38893878	numsnp=50	length=320,512	state2,cn=1	9	startsnp=BovineHD1800011491	endsnp=BovineHD1800011534
chr19:12860683-13002657	numsnp=38	length=141,975	state2,cn=1	9	startsnp=BovineHD4100013944	endsnp=BovineHD1900003435
chr19:48181378-48305042	numsnp=31	length=123,665	state2,cn=1	9	startsnp=BovineHD1900013391	endsnp=BovineHD1900013418
chr19:63820023-63912238	numsnp=33	length=92,216	state2,cn=1	9	startsnp=BovineHD1900018484	endsnp=BovineHD1900018521
chr20:8475414-8757679	numsnp=60	length=282,266	state2,cn=1	9	startsnp=BTB-00771346	endsnp=Hapmap25538-BTA-134885
chr20:70875830-71571246	numsnp=179	length=695,417	state2,cn=1	9	startsnp=BovineHD2000020746	endsnp=BovineHD2000020917
chr21:70252249-70449176	numsnp=68	length=196,928	state2,cn=1	9	startsnp=BovineHD2100020535	endsnp=BovineHD2100020597
chr21:70701216-70896927	numsnp=58	length=195,712	state2,cn=1	9	startsnp=BovineHD2100020703	endsnp=BovineHD2100020748
chr22:44160849-44355284	numsnp=43	length=194,436	state2,cn=1	9	startsnp=BovineHD2200012779	endsnp=BovineHD2200012817
chr22:59964685-60220816	numsnp=82	length=256,132	state2,cn=1	9	startsnp=BovineHD2200017401	endsnp=BovineHD2200017476
chr22:60459451-60644882	numsnp=59	length=185,432	state2,cn=1	9	startsnp=ARS-BFGL-NGS-41433	endsnp=BovineHD2200017648
chr22:60816476-61199665	numsnp=118	length=383,190	state2,cn=1	9	startsnp=BovineHD2200017714	endsnp=ARS-BFGL-NGS-105794
chr23:16298875-16368660	numsnp=20	length=69,786	state2,cn=1	9	startsnp=BovineHD2300004188	endsnp=BovineHD2300004202
chr23:26822064-26895106	numsnp=24	length=73,043	state2,cn=1	9	startsnp=BovineHD2300007268	endsnp=BovineHD2300007294
chr23:33936798-34589899	numsnp=148	length=653,102	state2,cn=1	9	startsnp=BovineHD2300009958	endsnp=BovineHD2300010151
chr23:50186819-50331028	numsnp=51	length=144,210	state2,cn=1	9	startsnp=BovineHD2300014635	endsnp=BovineHD2300014686
chr25:271849-659538	numsnp=98	length=387,690	state2,cn=1	9	startsnp=BovineHD2500000048	endsnp=BovineHD2500000133
chr25:736464-1214553	numsnp=133	length=478,090	state2,cn=1	9	startsnp=ARS-BFGL-NGS-119486	endsnp=BovineHD2500000273
chr25:1764213-2011350	numsnp=64	length=247,138	state2,cn=1	9	startsnp=BovineHD2500000363	endsnp=BovineHD2500000406
chr25:9214045-9270380	numsnp=11	length=56,336	state2,cn=1	9	startsnp=BovineHD2500002453	endsnp=BovineHD2500002463
chr25:19433133-19581064	numsnp=27	length=147,932	state2,cn=1	9	startsnp=BovineHD2500005406	endsnp=ARS-BFGL-NGS-31542
chr25:39733401-39807389	numsnp=29	length=73,989	state2,cn=1	9	startsnp=BovineHD2500011086	endsnp=BovineHD2500011108
chr25:41129839-41374004	numsnp=71	length=244,166	state2,cn=1	9	startsnp=BovineHD4100017542	endsnp=BovineHD4100017560
chr25:41596286-42370881	numsnp=209	length=774,596	state2,cn=1	9	startsnp=ARS-BFGL-NGS-30598	endsnp=BovineHD2500011869
chr25:42492384-42740703	numsnp=70	length=248,320	state2,cn=1	9	startsnp=BovineHD2500011891	endsnp=BovineHD2500012250
chr26:20561955-20638570	numsnp=18	length=76,616	state2,cn=1	9	startsnp=BovineHD2600005334	endsnp=BovineHD2600005347
chr26:50842832-51291371	numsnp=112	length=448,540	state2,cn=1	9	startsnp=ARS-BFGL-NGS-948	endsnp=BovineHD2600014810
chr26:51460945-51680135	numsnp=76	length=219,191	state2,cn=1	9	startsnp=ARS-BFGL-NGS-101725	endsnp=ARS-BFGL-NGS-17431
chr28:19549475-19674311	numsnp=39	length=124,837	state2,cn=1	9	startsnp=BovineHD2800005295	endsnp=BovineHD2800005334
chr28:24885275-25219425	numsnp=60	length=334,151	state2,cn=1	9	startsnp=BovineHD2800006444	endsnp=BovineHD2800006494
chr29:48214437-48276737	numsnp=16	length=62,301	state2,cn=1	9	startsnp=BovineHD2900014239	endsnp=BovineHD2900014254
chr29:48914909-49140640	numsnp=49	length=225,732	state2,cn=1	9	startsnp=BovineHD2900014462	endsnp=BovineHD2900015619
chr29:49182244-49494755	numsnp=56	length=312,512	state2,cn=1	9	startsnp=BovineHD2900014514	endsnp=BovineHD2900014572
chr29:49666863-49812821	numsnp=27	length=145,959	state2,cn=1	9	startsnp=BovineHD2900014606	endsnp=BovineHD2900014632
chr29:49997333-50207785	numsnp=33	length=210,453	state2,cn=1	9	startsnp=BovineHD2900014664	endsnp=BovineHD2900014695
chr29:50930941-51174708	numsnp=53	length=243,768	state2,cn=1	9	startsnp=BovineHD2900014857	endsnp=BovineHD2900014907
chr29:51258823-51502868	numsnp=52	length=244,046	state2,cn=1	9	startsnp=BovineHD2900014928	endsnp=ARS-BFGL-NGS-29340
chr3:120470286-120552193	numsnp=24	length=81,908	state5,cn=3	9	startsnp=BovineHD0300035228	endsnp=BovineHD0300035250
chr5:5101-251403	numsnp=40	length=246,303	state5,cn=3	9	startsnp=BovineHD0500000001	endsnp=BovineHD0500000054
chr5:117356476-117497778	numsnp=25	length=141,303	state5,cn=3	9	startsnp=BovineHD0500034093	endsnp=BovineHD0500036296
chr10:22872499-23003955	numsnp=24	length=131,457	state5,cn=3	9	startsnp=BovineHD1000007460	endsnp=BovineHD1000007549
chr14:62713422-62769117	numsnp=13	length=55,696	state5,cn=3	9	startsnp=BovineHD1400017444	endsnp=BovineHD1400017455
chr15:80018574-80120454	numsnp=19	length=101,881	state5,cn=3	9	startsnp=BovineHD1500023343	endsnp=BovineHD1500023363
chr23:34593490-34866601	numsnp=30	length=273,112	state5,cn=3	9	startsnp=BovineHD2300010153	endsnp=BovineHD2300010200
chr24:27259920-27312364	numsnp=11	length=52,445	state5,cn=3	9	startsnp=BovineHD2400007450	endsnp=ARS-BFGL-NGS-119207
chr29:38567737-38797907	numsnp=41	length=230,171	state5,cn=3	9	startsnp=BovineHD2900011663	endsnp=BovineHD2900011743
chr6:6502610-6902973	numsnp=78	length=400,364	state6,cn=4	9	startsnp=BovineHD0600001420	endsnp=BovineHD0600001493
chr5:102773939-102932410	numsnp=63	length=158,472	state1,cn=0	10	startsnp=BovineHD0500029439	endsnp=BovineHD0500029507
chr7:9771150-10642689	numsnp=67	length=871,540	state1,cn=0	10	startsnp=BovineHD0700002547	endsnp=BovineHD0700002785
chr7:11136869-11261305	numsnp=26	length=124,437	state1,cn=0	10	startsnp=BovineHD0700032940	endsnp=BovineHD0700002975
chr12:32054331-32162911	numsnp=13	length=108,581	state1,cn=0	10	startsnp=BovineHD1200009422	endsnp=BovineHD1200009451
chr12:70392108-70620665	numsnp=24	length=228,558	state1,cn=0	10	startsnp=BovineHD1200019356	endsnp=BovineHD1200019397
chr12:72748544-72882991	numsnp=11	length=134,448	state1,cn=0	10	startsnp=BovineHD1200020098	endsnp=BovineHD1200020124
chr12:73553506-73863425	numsnp=16	length=309,920	state1,cn=0	10	startsnp=BovineHD1200020357	endsnp=BovineHD1200020490
chr12:74840021-75193156	numsnp=18	length=353,136	state1,cn=0	10	startsnp=BovineHD1200020836	endsnp=BovineHD1200020930
chr13:170016-321886	numsnp=14	length=151,871	state1,cn=0	10	startsnp=BovineHD1300000020	endsnp=BovineHD1300000048
chr15:80090566-80529996	numsnp=49	length=439,431	state1,cn=0	10	startsnp=BovineHD1500023358	endsnp=BovineHD1500026023
chr1:20033381-20093504	numsnp=23	length=60,124	state2,cn=1	10	startsnp=BovineHD0100005949	endsnp=BovineHD0100005969
chr1:20670704-20792484	numsnp=43	length=121,781	state2,cn=1	10	startsnp=BovineHD0100006120	endsnp=BovineHD0100006158
chr1:59884291-60260551	numsnp=95	length=376,261	state2,cn=1	10	startsnp=BovineHD0100016946	endsnp=BovineHD0100017031
chr1:72758347-72931620	numsnp=42	length=173,274	state2,cn=1	10	startsnp=BovineHD0100020841	endsnp=BovineHD0100020881
chr1:76601238-76755599	numsnp=62	length=154,362	state2,cn=1	10	startsnp=BovineHD0100022072	endsnp=BovineHD0100022133
chr1:84617946-84795961	numsnp=38	length=178,016	state2,cn=1	10	startsnp=BovineHD0100024241	endsnp=BovineHD0100024275
chr1:127507201-127649788	numsnp=31	length=142,588	state2,cn=1	10	startsnp=BovineHD0100036037	endsnp=BTB-00056238
chr1:131409580-131495551	numsnp=29	length=85,972	state2,cn=1	10	startsnp=BovineHD0100037357	endsnp=BovineHD0100037383
chr1:133527757-133616398	numsnp=22	length=88,642	state2,cn=1	10	startsnp=BovineHD0100038032	endsnp=BovineHD0100038049
chr1:147007749-147107559	numsnp=44	length=99,811	state2,cn=1	10	startsnp=BovineHD0100042487	endsnp=BovineHD4100000845
chr1:147301032-147410842	numsnp=48	length=109,811	state2,cn=1	10	startsnp=BovineHD0100042579	endsnp=BovineHD0100042628
chr1:157193589-157273077	numsnp=34	length=79,489	state2,cn=1	10	startsnp=BovineHD0100046640	endsnp=BovineHD0100045991
chr2:24714894-24889494	numsnp=34	length=174,601	state2,cn=1	10	startsnp=BovineHD0200007107	endsnp=BovineHD0200007153
chr2:31238054-31507071	numsnp=103	length=269,018	state2,cn=1	10	startsnp=BovineHD0200009241	endsnp=BovineHD0200009334
chr2:36850914-37085429	numsnp=56	length=234,516	state2,cn=1	10	startsnp=Hapmap42250-BTA-55589	endsnp=BovineHD0200010861
chr2:48003476-48176523	numsnp=37	length=173,048	state2,cn=1	10	startsnp=BovineHD0200013914	endsnp=BovineHD0200013949
chr2:48323931-48448951	numsnp=32	length=125,021	state2,cn=1	10	startsnp=BovineHD0200013984	endsnp=BovineHD0200014012
chr2:51330712-51397309	numsnp=15	length=66,598	state2,cn=1	10	startsnp=BovineHD0200014720	endsnp=BovineHD0200014735
chr2:61708027-61787820	numsnp=40	length=79,794	state2,cn=1	10	startsnp=BovineHD0200017729	endsnp=BovineHD0200017770
chr2:101874238-102126882	numsnp=66	length=252,645	state2,cn=1	10	startsnp=BovineHD0200029246	endsnp=BovineHD0200029330
chr2:136525277-136633667	numsnp=26	length=108,391	state2,cn=1	10	startsnp=BovineHD0200040026	endsnp=BovineHD0200040051
chr3:604022-787371	numsnp=45	length=183,350	state2,cn=1	10	startsnp=BovineHD0300000127	endsnp=ARS-BFGL-NGS-67047
chr3:15137638-15320333	numsnp=62	length=182,696	state2,cn=1	10	startsnp=BovineHD4100001870	endsnp=BovineHD0300004992
chr3:29045330-29095368	numsnp=15	length=50,039	state2,cn=1	10	startsnp=BovineHD0300009190	endsnp=BovineHD0300009204
chr3:40511241-40667345	numsnp=55	length=156,105	state2,cn=1	10	startsnp=BovineHD0300012333	endsnp=BovineHD0300012387
chr3:62801340-62949135	numsnp=37	length=147,796	state2,cn=1	10	startsnp=BovineHD0300018815	endsnp=BovineHD0300018851
chr3:72227464-72358925	numsnp=30	length=131,462	state2,cn=1	10	startsnp=ARS-BFGL-NGS-78645	endsnp=BovineHD0300021184
chr3:83491965-83663765	numsnp=43	length=171,801	state2,cn=1	10	startsnp=BovineHD0300023894	endsnp=BovineHD0300023928
chr3:94423069-94515232	numsnp=22	length=92,164	state2,cn=1	10	startsnp=BovineHD0300027207	endsnp=BovineHD0300036315
chr3:98358893-98552988	numsnp=77	length=194,096	state2,cn=1	10	startsnp=BovineHD0300028257	endsnp=INRA-437
chr3:110901226-111027481	numsnp=38	length=126,256	state2,cn=1	10	startsnp=BovineHD0300031907	endsnp=BovineHD0300031942
chr3:118071660-118230562	numsnp=44	length=158,903	state2,cn=1	10	startsnp=BovineHD0300034431	endsnp=BovineHD0300034469
chr3:120552193-121074367	numsnp=139	length=522,175	state2,cn=1	10	startsnp=BovineHD0300035250	endsnp=BovineHD0300035377
chr4:43669842-43892016	numsnp=40	length=222,175	state2,cn=1	10	startsnp=BovineHD0400011957	endsnp=BovineHD0400011995
chr4:51318774-51371784	numsnp=12	length=53,011	state2,cn=1	10	startsnp=BovineHD0400014199	endsnp=BovineHD0400014207
chr4:63882714-64032945	numsnp=37	length=150,232	state2,cn=1	10	startsnp=BovineHD0400017490	endsnp=BovineHD0400017527
chr4:72375370-72508028	numsnp=28	length=132,659	state2,cn=1	10	startsnp=BovineHD0400020051	endsnp=BovineHD0400020078
chr4:84055144-84241119	numsnp=34	length=185,976	state2,cn=1	10	startsnp=BovineHD0400023290	endsnp=BovineHD0400023322
chr4:88782951-88837310	numsnp=16	length=54,360	state2,cn=1	10	startsnp=Hapmap55855-rs29017652	endsnp=BovineHD0400024598
chr4:89897538-90123550	numsnp=77	length=226,013	state2,cn=1	10	startsnp=BovineHD0400024891	endsnp=BovineHD0400024967
chr4:95900218-95974974	numsnp=21	length=74,757	state2,cn=1	10	startsnp=BovineHD0400036187	endsnp=BovineHD0400026716
chr5:40780471-40879690	numsnp=30	length=99,220	state2,cn=1	10	startsnp=BovineHD0500011670	endsnp=BovineHD0500011695
chr5:51392175-51515066	numsnp=22	length=122,892	state2,cn=1	10	startsnp=Hapmap34504-BES10_Contig662_1293	endsnp=BovineHD0500014818
chr5:59648377-59726658	numsnp=41	length=78,282	state2,cn=1	10	startsnp=BovineHD0500016694	endsnp=BovineHD0500016736
chr5:76539895-76747494	numsnp=26	length=207,600	state2,cn=1	10	startsnp=BovineHD0500021841	endsnp=BovineHD0500021861
chr5:79225281-79322625	numsnp=29	length=97,345	state2,cn=1	10	startsnp=BovineHD0500022475	endsnp=BovineHD0500022499
chr5:99937939-100060374	numsnp=31	length=122,436	state2,cn=1	10	startsnp=BovineHD0500028597	endsnp=BovineHD0500028632
chr6:27553708-27608449	numsnp=21	length=54,742	state2,cn=1	10	startsnp=BovineHD0600007611	endsnp=BovineHD0600007630
chr6:33316656-33417084	numsnp=28	length=100,429	state2,cn=1	10	startsnp=BovineHD4100004417	endsnp=BovineHD0600009334
chr6:38825835-39037376	numsnp=45	length=211,542	state2,cn=1	10	startsnp=Hapmap27083-BTC-041166	endsnp=BovineHD0600010777
chr6:56278798-56531151	numsnp=69	length=252,354	state2,cn=1	10	startsnp=BTB-01133278	endsnp=BovineHD0600015460
chr6:65978639-66090269	numsnp=28	length=111,631	state2,cn=1	10	startsnp=BTB-00260917	endsnp=BovineHD0600018238
chr6:72540759-72607087	numsnp=21	length=66,329	state2,cn=1	10	startsnp=BovineHD0600020146	endsnp=BovineHD0600020164
chr6:81278048-81340467	numsnp=12	length=62,420	state2,cn=1	10	startsnp=BovineHD0600022394	endsnp=BovineHD0600022404
chr6:107120841-107297984	numsnp=53	length=177,144	state2,cn=1	10	startsnp=BovineHD0600030136	endsnp=BovineHD0600030187
chr6:107662640-107738103	numsnp=22	length=75,464	state2,cn=1	10	startsnp=BovineHD0600030343	endsnp=BovineHD0600030361
chr6:109059937-109844160	numsnp=154	length=784,224	state2,cn=1	10	startsnp=BovineHD0600030744	endsnp=BovineHD0600030892
chr7:24094310-24286099	numsnp=55	length=191,790	state2,cn=1	10	startsnp=BovineHD0700006601	endsnp=BovineHD0700006654
chr7:43228786-43330896	numsnp=26	length=102,111	state2,cn=1	10	startsnp=BovineHD0700012542	endsnp=BovineHD0700012567
chr7:47757812-47883869	numsnp=38	length=126,058	state2,cn=1	10	startsnp=BovineHD0700013812	endsnp=BovineHD0700013848
chr7:53536229-53641290	numsnp=60	length=105,062	state2,cn=1	10	startsnp=BovineHD0700015401	endsnp=BovineHD0700015465
chr7:108116141-108302841	numsnp=55	length=186,701	state2,cn=1	10	startsnp=BovineHD0700031513	endsnp=BovineHD0700031566
chr7:109881897-110054712	numsnp=22	length=172,816	state2,cn=1	10	startsnp=BovineHD0700032098	endsnp=BovineHD0700034065
chr8:26938917-27159357	numsnp=42	length=220,441	state2,cn=1	10	startsnp=BovineHD0800008136	endsnp=BovineHD0800008176
chr8:53486832-53590531	numsnp=21	length=103,700	state2,cn=1	10	startsnp=BovineHD0800016070	endsnp=BovineHD0800016093
chr8:94460889-94693789	numsnp=67	length=232,901	state2,cn=1	10	startsnp=ARS-BFGL-NGS-50038	endsnp=BovineHD0800028028
chr9:9709261-9775082	numsnp=18	length=65,822	state2,cn=1	10	startsnp=Hapmap27457-BTA-159047	endsnp=BovineHD0900002394
chr9:31246546-31381170	numsnp=33	length=134,625	state2,cn=1	10	startsnp=BovineHD0900008501	endsnp=BovineHD0900008531
chr9:49923312-50021937	numsnp=26	length=98,626	state2,cn=1	10	startsnp=BTA-87887-no-rs	endsnp=BovineHD0900013797
chr9:56030649-56142649	numsnp=36	length=112,001	state2,cn=1	10	startsnp=Hapmap46176-BTA-88146	endsnp=BovineHD0900015408
chr9:64771671-64848827	numsnp=13	length=77,157	state2,cn=1	10	startsnp=BovineHD0900017780	endsnp=BovineHD0900017793
chr9:79579670-79695019	numsnp=26	length=115,350	state2,cn=1	10	startsnp=BovineHD0900022099	endsnp=BovineHD0900022123
chr9:99648129-99722691	numsnp=32	length=74,563	state2,cn=1	10	startsnp=BTA-85069-no-rs	endsnp=BovineHD0900028853
chr10:38355594-38439355	numsnp=20	length=83,762	state2,cn=1	10	startsnp=BovineHD1000011871	endsnp=BovineHD1000011888
chr10:41283859-41541477	numsnp=59	length=257,619	state2,cn=1	10	startsnp=BovineHD1000012629	endsnp=BovineHD1000012678
chr10:42687611-42840754	numsnp=36	length=153,144	state2,cn=1	10	startsnp=BovineHD1000012920	endsnp=BovineHD4100008076
chr10:48150692-48226400	numsnp=38	length=75,709	state2,cn=1	10	startsnp=BovineHD1000014472	endsnp=BovineHD1000014512
chr10:51305855-51554432	numsnp=49	length=248,578	state2,cn=1	10	startsnp=BovineHD1000015398	endsnp=BovineHD1000015443
chr10:70750438-70878349	numsnp=27	length=127,912	state2,cn=1	10	startsnp=BovineHD1000020291	endsnp=BovineHD1000020317
chr11:15003611-15140536	numsnp=26	length=136,926	state2,cn=1	10	startsnp=BovineHD1100031531	endsnp=BovineHD1100004842
chr11:21559452-21654417	numsnp=43	length=94,966	state2,cn=1	10	startsnp=BovineHD1100006467	endsnp=BovineHD1100006508
chr11:31911599-31967781	numsnp=22	length=56,183	state2,cn=1	10	startsnp=BovineHD1100009585	endsnp=BovineHD1100009605
chr11:51903792-51995779	numsnp=17	length=91,988	state2,cn=1	10	startsnp=BovineHD1100015262	endsnp=BovineHD1100015276
chr11:58267632-58419387	numsnp=35	length=151,756	state2,cn=1	10	startsnp=BovineHD1100016769	endsnp=ARS-BFGL-BAC-11747
chr11:70865913-70986341	numsnp=30	length=120,429	state2,cn=1	10	startsnp=BovineHD1100020310	endsnp=BovineHD1100020339
chr11:75098286-75248626	numsnp=60	length=150,341	state2,cn=1	10	startsnp=BovineHD1100021397	endsnp=BovineHD1100021458
chr11:103560890-104094452	numsnp=139	length=533,563	state2,cn=1	10	startsnp=BovineHD1100030138	endsnp=BovineHD1100030258
chr11:104571309-104685104	numsnp=33	length=113,796	state2,cn=1	10	startsnp=BovineHD1100030410	endsnp=BovineHD1100030438
chr11:105694813-105791903	numsnp=23	length=97,091	state2,cn=1	10	startsnp=BovineHD1100030692	endsnp=BovineHD1100030711
chr11:106196578-106510932	numsnp=100	length=314,355	state2,cn=1	10	startsnp=BovineHD1100030807	endsnp=ARS-BFGL-NGS-11064
chr11:106586225-106710431	numsnp=61	length=124,207	state2,cn=1	10	startsnp=BovineHD1100030959	endsnp=BovineHD1100031014
chr12:60218974-60287659	numsnp=28	length=68,686	state2,cn=1	10	startsnp=BovineHD1200016508	endsnp=BovineHD1200016536
chr13:20965563-21042957	numsnp=39	length=77,395	state2,cn=1	10	startsnp=BovineHD1300006064	endsnp=BovineHD1300024548
chr14:1549928-1873047	numsnp=62	length=323,120	state2,cn=1	10	startsnp=BovineHD1400000178	endsnp=BovineHD1400000244
chr14:2006872-2230450	numsnp=50	length=223,579	state2,cn=1	10	startsnp=BovineHD1400000273	endsnp=BovineHD4100010528
chr14:2790501-2902668	numsnp=19	length=112,168	state2,cn=1	10	startsnp=BovineHD4100010557	endsnp=BovineHD1400000469
chr14:33246785-33304950	numsnp=22	length=58,166	state2,cn=1	10	startsnp=BovineHD1400009529	endsnp=BovineHD1400009550
chr14:40826004-40967636	numsnp=53	length=141,633	state2,cn=1	10	startsnp=BovineHD1400011678	endsnp=BTB-01387726
chr14:44047994-44134488	numsnp=29	length=86,495	state2,cn=1	10	startsnp=BovineHD1400012467	endsnp=BovineHD1400012493
chr14:62627737-62710391	numsnp=27	length=82,655	state2,cn=1	10	startsnp=BovineHD1400017419	endsnp=BovineHD1400017443
chr14:62782571-62935267	numsnp=31	length=152,697	state2,cn=1	10	startsnp=BovineHD1400017458	endsnp=BovineHD1400017486
chr14:66819485-67489095	numsnp=161	length=669,611	state2,cn=1	10	startsnp=ARS-BFGL-NGS-115036	endsnp=BovineHD1400018846
chr14:71761473-71928766	numsnp=46	length=167,294	state2,cn=1	10	startsnp=BovineHD1400020108	endsnp=BovineHD1400020157
chr14:81289089-81372491	numsnp=20	length=83,403	state2,cn=1	10	startsnp=BovineHD1400022974	endsnp=BovineHD1400022992
chr14:83547949-83615008	numsnp=33	length=67,060	state2,cn=1	10	startsnp=BovineHD1400023602	endsnp=BovineHD1400023633
chr15:17050575-17153857	numsnp=19	length=103,283	state2,cn=1	10	startsnp=BovineHD1500004349	endsnp=BovineHD1500004365
chr15:20652041-20762546	numsnp=41	length=110,506	state2,cn=1	10	startsnp=BovineHD1500005241	endsnp=BovineHD1500005280
chr15:43191872-43308530	numsnp=30	length=116,659	state2,cn=1	10	startsnp=BovineHD1500012012	endsnp=Hapmap46538-BTA-88332
chr15:47814022-47998053	numsnp=23	length=184,032	state2,cn=1	10	startsnp=BovineHD1500013722	endsnp=BovineHD1500013771
chr15:48054165-48251926	numsnp=57	length=197,762	state2,cn=1	10	startsnp=BovineHD1500013780	endsnp=BovineHD1500013841
chr15:50439555-50491730	numsnp=13	length=52,176	state2,cn=1	10	startsnp=BovineHD1500014544	endsnp=BovineHD1500014557
chr15:84861533-85143271	numsnp=70	length=281,739	state2,cn=1	10	startsnp=BovineHD1500024892	endsnp=BovineHD4100012261
chr16:5670600-5812501	numsnp=34	length=141,902	state2,cn=1	10	startsnp=BovineHD1600001602	endsnp=BovineHD1600023912
chr16:8419721-8486467	numsnp=10	length=66,747	state2,cn=1	10	startsnp=BovineHD1600002379	endsnp=BTA-88251-no-rs
chr16:27055885-27154383	numsnp=33	length=98,499	state2,cn=1	10	startsnp=BovineHD1600007484	endsnp=BovineHD1600007515
chr16:38371856-38530062	numsnp=33	length=158,207	state2,cn=1	10	startsnp=BovineHD1600011020	endsnp=BovineHD1600011049
chr16:62689142-62742829	numsnp=11	length=53,688	state2,cn=1	10	startsnp=BovineHD1600017579	endsnp=BovineHD1600017586
chr16:68969160-69088226	numsnp=49	length=119,067	state2,cn=1	10	startsnp=BovineHD1600019556	endsnp=BovineHD1600019603
chr16:70814352-70924028	numsnp=24	length=109,677	state2,cn=1	10	startsnp=BovineHD1600020126	endsnp=BovineHD1600020149
chr16:71083442-71180683	numsnp=26	length=97,242	state2,cn=1	10	startsnp=BovineHD1600020182	endsnp=BovineHD1600020209
chr17:26101559-26166694	numsnp=23	length=65,136	state2,cn=1	10	startsnp=BovineHD1700007357	endsnp=BovineHD1700007390
chr17:37680285-37772274	numsnp=28	length=91,990	state2,cn=1	10	startsnp=BovineHD1700010287	endsnp=ARS-BFGL-NGS-6358
chr17:73354100-73519733	numsnp=50	length=165,634	state2,cn=1	10	startsnp=BovineHD1700021435	endsnp=BovineHD1700021478
chr17:73569170-73853171	numsnp=95	length=284,002	state2,cn=1	10	startsnp=BovineHD1700021492	endsnp=BovineHD1700021584
chr17:74836297-75148791	numsnp=58	length=312,495	state2,cn=1	10	startsnp=BovineHD1700021850	endsnp=BovineHD1700022147
chr18:21665648-21895177	numsnp=49	length=229,530	state2,cn=1	10	startsnp=BovineHD1800006681	endsnp=BTA-42733-no-rs
chr19:48181378-48280175	numsnp=26	length=98,798	state2,cn=1	10	startsnp=BovineHD1900013391	endsnp=ARS-BFGL-BAC-35052
chr20:8475414-8757679	numsnp=60	length=282,266	state2,cn=1	10	startsnp=BTB-00771346	endsnp=Hapmap25538-BTA-134885
chr20:45030237-45106413	numsnp=12	length=76,177	state2,cn=1	10	startsnp=BovineHD2000012773	endsnp=Hapmap61037-rs29016327
chr20:60604606-60706699	numsnp=30	length=102,094	state2,cn=1	10	startsnp=BovineHD2000017010	endsnp=BovineHD2000017039
chr20:71121431-71425002	numsnp=79	length=303,572	state2,cn=1	10	startsnp=BovineHD2000020802	endsnp=BovineHD2000020874
chr21:53450276-53653708	numsnp=39	length=203,433	state2,cn=1	10	startsnp=BovineHD2100015324	endsnp=BovineHD2100015356
chr21:70221263-70393623	numsnp=58	length=172,361	state2,cn=1	10	startsnp=BovineHD2100020518	endsnp=ARS-BFGL-NGS-71316
chr21:70701216-70901743	numsnp=59	length=200,528	state2,cn=1	10	startsnp=BovineHD2100020703	endsnp=ARS-BFGL-NGS-111489
chr22:59964685-60222074	numsnp=83	length=257,390	state2,cn=1	10	startsnp=BovineHD2200017401	endsnp=BovineHD2200017477
chr22:60470891-61005174	numsnp=182	length=534,284	state2,cn=1	10	startsnp=BovineHD2200017599	endsnp=BovineHD2200017767
chr22:61099118-61199665	numsnp=38	length=100,548	state2,cn=1	10	startsnp=Hapmap52284-rs29018845	endsnp=ARS-BFGL-NGS-105794
chr23:16298875-16368660	numsnp=20	length=69,786	state2,cn=1	10	startsnp=BovineHD2300004188	endsnp=BovineHD2300004202
chr23:51919582-52015979	numsnp=25	length=96,398	state2,cn=1	10	startsnp=BovineHD2300015087	endsnp=BovineHD2300015109
chr25:271849-659538	numsnp=98	length=387,690	state2,cn=1	10	startsnp=BovineHD2500000048	endsnp=BovineHD2500000133
chr25:767659-1004903	numsnp=46	length=237,245	state2,cn=1	10	startsnp=BovineHD2500000181	endsnp=BovineHD2500000219
chr25:1040952-1431881	numsnp=116	length=390,930	state2,cn=1	10	startsnp=BovineHD2500000227	endsnp=Hapmap33541-BTC-016426
chr25:1804411-2011350	numsnp=55	length=206,940	state2,cn=1	10	startsnp=BovineHD2500000372	endsnp=BovineHD2500000406
chr25:19373377-19581064	numsnp=42	length=207,688	state2,cn=1	10	startsnp=BovineHD2500005390	endsnp=ARS-BFGL-NGS-31542
chr25:39733401-39807389	numsnp=29	length=73,989	state2,cn=1	10	startsnp=BovineHD2500011086	endsnp=BovineHD2500011108
chr25:41174512-41374004	numsnp=53	length=199,493	state2,cn=1	10	startsnp=BovineHD2500011618	endsnp=BovineHD4100017560
chr25:41582625-41850541	numsnp=83	length=267,917	state2,cn=1	10	startsnp=BovineHD2500011712	endsnp=BovineHD2500011773
chr25:41953370-42740703	numsnp=196	length=787,334	state2,cn=1	10	startsnp=BovineHD4100017582	endsnp=BovineHD2500012250
chr26:44563398-44636059	numsnp=24	length=72,662	state2,cn=1	10	startsnp=BovineHD2600012548	endsnp=BovineHD2600012574
chr26:50866198-51291371	numsnp=109	length=425,174	state2,cn=1	10	startsnp=BovineHD2600014706	endsnp=BovineHD2600014810
chr26:51460945-51680135	numsnp=76	length=219,191	state2,cn=1	10	startsnp=ARS-BFGL-NGS-101725	endsnp=ARS-BFGL-NGS-17431
chr28:19549475-19674311	numsnp=39	length=124,837	state2,cn=1	10	startsnp=BovineHD2800005295	endsnp=BovineHD2800005334
chr28:24885275-25219425	numsnp=60	length=334,151	state2,cn=1	10	startsnp=BovineHD2800006444	endsnp=BovineHD2800006494
chr29:48214437-48276737	numsnp=16	length=62,301	state2,cn=1	10	startsnp=BovineHD2900014239	endsnp=BovineHD2900014254
chr29:49997333-50230041	numsnp=40	length=232,709	state2,cn=1	10	startsnp=BovineHD2900014664	endsnp=BovineHD2900014701
chr29:50243726-50320816	numsnp=19	length=77,091	state2,cn=1	10	startsnp=BovineHD2900014703	endsnp=BovineHD2900014720
chr29:50930941-51174708	numsnp=53	length=243,768	state2,cn=1	10	startsnp=BovineHD2900014857	endsnp=BovineHD2900014907
chr29:51258823-51502868	numsnp=52	length=244,046	state2,cn=1	10	startsnp=BovineHD2900014928	endsnp=ARS-BFGL-NGS-29340
chr5:5101-189013	numsnp=33	length=183,913	state5,cn=3	10	startsnp=BovineHD0500000001	endsnp=BovineHD0500000044
chr5:59496240-59642942	numsnp=15	length=146,703	state5,cn=3	10	startsnp=BovineHD0500016674	endsnp=BovineHD0500016693
chr5:117356476-117592372	numsnp=35	length=235,897	state5,cn=3	10	startsnp=BovineHD0500034093	endsnp=BovineHD0500034154
chr9:9779282-9881975	numsnp=24	length=102,694	state5,cn=3	10	startsnp=BovineHD0900002395	endsnp=BovineHD0900002416
chr10:23160598-23600571	numsnp=20	length=439,974	state5,cn=3	10	startsnp=BovineHD1000007621	endsnp=BovineHD1000007747
chr12:70645065-70868927	numsnp=17	length=223,863	state5,cn=3	10	startsnp=BovineHD1200019402	endsnp=BovineHD1200019452
chr14:62713422-62769117	numsnp=13	length=55,696	state5,cn=3	10	startsnp=BovineHD1400017444	endsnp=BovineHD1400017455
chr29:38567737-38742545	numsnp=35	length=174,809	state5,cn=3	10	startsnp=BovineHD2900011663	endsnp=BovineHD2900011727
chr6:6502610-6902973	numsnp=78	length=400,364	state6,cn=4	10	startsnp=BovineHD0600001420	endsnp=BovineHD0600001493
chr1:93730576-93819471	numsnp=10	length=88,896	state1,cn=0	11	startsnp=BovineHD0100047110	endsnp=BovineHD0100026605
chr5:58376266-58441130	numsnp=10	length=64,865	state1,cn=0	11	startsnp=BovineHD0500016449	endsnp=BovineHD0500016460
chr12:32054331-32162911	numsnp=13	length=108,581	state1,cn=0	11	startsnp=BovineHD1200009422	endsnp=BovineHD1200009451
chr12:70363408-70569888	numsnp=20	length=206,481	state1,cn=0	11	startsnp=BovineHD1200028172	endsnp=BovineHD1200019382
chr13:170016-369827	numsnp=22	length=199,812	state1,cn=0	11	startsnp=BovineHD1300000020	endsnp=BovineHD1300000059
chr15:46805089-46935735	numsnp=13	length=130,647	state1,cn=0	11	startsnp=BovineHD1500013344	endsnp=BovineHD1500025797
chr15:80176347-80316180	numsnp=34	length=139,834	state1,cn=0	11	startsnp=BovineHD1500026018	endsnp=BovineHD1500023410
chr16:5676289-5812501	numsnp=33	length=136,213	state1,cn=0	11	startsnp=BovineHD1600001604	endsnp=BovineHD1600023912
chr16:8091686-8163296	numsnp=16	length=71,611	state1,cn=0	11	startsnp=BovineHD1600002309	endsnp=BovineHD1600002324
chr16:8414004-8486467	numsnp=12	length=72,464	state1,cn=0	11	startsnp=BTA-26788-no-rs	endsnp=BTA-88251-no-rs
chr1:147337528-147410842	numsnp=24	length=73,315	state2,cn=1	11	startsnp=BovineHD0100042605	endsnp=BovineHD0100042628
chr2:24714894-24889494	numsnp=34	length=174,601	state2,cn=1	11	startsnp=BovineHD0200007107	endsnp=BovineHD0200007153
chr2:35193001-35277747	numsnp=19	length=84,747	state2,cn=1	11	startsnp=BovineHD0200010355	endsnp=BovineHD0200010371
chr2:48003476-48176523	numsnp=37	length=173,048	state2,cn=1	11	startsnp=BovineHD0200013914	endsnp=BovineHD0200013949
chr2:48306020-48448951	numsnp=37	length=142,932	state2,cn=1	11	startsnp=BovineHD4100001194	endsnp=BovineHD0200014012
chr2:51207909-51397309	numsnp=48	length=189,401	state2,cn=1	11	startsnp=BovineHD0200014686	endsnp=BovineHD0200014735
chr2:101878668-101960240	numsnp=39	length=81,573	state2,cn=1	11	startsnp=BovineHD0200029251	endsnp=BovineHD0200029300
chr3:604022-787371	numsnp=45	length=183,350	state2,cn=1	11	startsnp=BovineHD0300000127	endsnp=ARS-BFGL-NGS-67047
chr3:78776536-78837660	numsnp=21	length=61,125	state2,cn=1	11	startsnp=BovineHD0300022706	endsnp=BovineHD0300022727
chr3:83491965-83663765	numsnp=43	length=171,801	state2,cn=1	11	startsnp=BovineHD0300023894	endsnp=BovineHD0300023928
chr3:94423069-94515232	numsnp=22	length=92,164	state2,cn=1	11	startsnp=BovineHD0300027207	endsnp=BovineHD0300036315
chr3:118071660-118137556	numsnp=19	length=65,897	state2,cn=1	11	startsnp=BovineHD0300034431	endsnp=BovineHD0300034447
chr3:120403408-120457545	numsnp=14	length=54,138	state2,cn=1	11	startsnp=BovineHD0300035214	endsnp=BovineHD0300035227
chr3:120556310-120787886	numsnp=55	length=231,577	state2,cn=1	11	startsnp=BovineHD0300035251	endsnp=BovineHD0300035299
chr3:120883492-121090520	numsnp=58	length=207,029	state2,cn=1	11	startsnp=BovineHD4100002577	endsnp=BovineHD0300035379
chr4:51318774-51371784	numsnp=12	length=53,011	state2,cn=1	11	startsnp=BovineHD0400014199	endsnp=BovineHD0400014207
chr4:72430829-72508028	numsnp=17	length=77,200	state2,cn=1	11	startsnp=BovineHD0400020062	endsnp=BovineHD0400020078
chr4:78652494-78808735	numsnp=49	length=156,242	state2,cn=1	11	startsnp=BovineHD0400021810	endsnp=BovineHD0400021855
chr4:88782951-88837310	numsnp=16	length=54,360	state2,cn=1	11	startsnp=Hapmap55855-rs29017652	endsnp=BovineHD0400024598
chr5:40820099-40877032	numsnp=18	length=56,934	state2,cn=1	11	startsnp=BovineHD0500011679	endsnp=BovineHD0500011694
chr5:76539895-76758621	numsnp=28	length=218,727	state2,cn=1	11	startsnp=BovineHD0500021841	endsnp=BovineHD0500021862
chr5:102770798-102954266	numsnp=66	length=183,469	state2,cn=1	11	startsnp=BovineHD0500029438	endsnp=Hapmap40294-BTA-89295
chr5:119408760-119853322	numsnp=138	length=444,563	state2,cn=1	11	startsnp=ARS-BFGL-NGS-25107	endsnp=ARS-BFGL-NGS-56909
chr6:38825835-39037376	numsnp=45	length=211,542	state2,cn=1	11	startsnp=Hapmap27083-BTC-041166	endsnp=BovineHD0600010777
chr6:56226510-56378115	numsnp=41	length=151,606	state2,cn=1	11	startsnp=BovineHD0600015385	endsnp=BovineHD0600015422
chr6:106922320-107057253	numsnp=53	length=134,934	state2,cn=1	11	startsnp=BovineHD0600030056	endsnp=BovineHD0600030112
chr6:109059937-109844160	numsnp=154	length=784,224	state2,cn=1	11	startsnp=BovineHD0600030744	endsnp=BovineHD0600030892
chr7:10117929-10642689	numsnp=43	length=524,761	state2,cn=1	11	startsnp=BovineHD0700002653	endsnp=BovineHD0700002785
chr7:24107045-24286099	numsnp=54	length=179,055	state2,cn=1	11	startsnp=BovineHD0700006603	endsnp=BovineHD0700006654
chr7:43228786-43327411	numsnp=25	length=98,626	state2,cn=1	11	startsnp=BovineHD0700012542	endsnp=BovineHD0700012566
chr7:53536229-53641290	numsnp=60	length=105,062	state2,cn=1	11	startsnp=BovineHD0700015401	endsnp=BovineHD0700015465
chr7:109881897-110014198	numsnp=19	length=132,302	state2,cn=1	11	startsnp=BovineHD0700032098	endsnp=BovineHD0700032114
chr8:28652200-28705702	numsnp=17	length=53,503	state2,cn=1	11	startsnp=BovineHD0800008664	endsnp=BovineHD0800008679
chr9:40566887-40631976	numsnp=20	length=65,090	state2,cn=1	11	startsnp=BovineHD0900011243	endsnp=BovineHD0900011259
chr9:64771671-64848827	numsnp=13	length=77,157	state2,cn=1	11	startsnp=BovineHD0900017780	endsnp=BovineHD0900017793
chr10:11460618-11541357	numsnp=36	length=80,740	state2,cn=1	11	startsnp=BovineHD1000003891	endsnp=BovineHD1000003926
chr10:79145657-79312084	numsnp=44	length=166,428	state2,cn=1	11	startsnp=BovineHD1000022626	endsnp=BovineHD1000022668
chr11:47123538-47206059	numsnp=38	length=82,522	state2,cn=1	11	startsnp=BovineHD1100013781	endsnp=BovineHD1100013814
chr11:65694352-65753889	numsnp=29	length=59,538	state2,cn=1	11	startsnp=BovineHD1100018553	endsnp=BovineHD1100018582
chr11:103644879-103888433	numsnp=62	length=243,555	state2,cn=1	11	startsnp=BovineHD1100030159	endsnp=BovineHD1100030214
chr11:104571309-104660438	numsnp=27	length=89,130	state2,cn=1	11	startsnp=BovineHD1100030410	endsnp=BovineHD1100030433
chr11:104862156-105078068	numsnp=55	length=215,913	state2,cn=1	11	startsnp=BovineHD1100030487	endsnp=BovineHD1100030545
chr11:105677940-105791903	numsnp=29	length=113,964	state2,cn=1	11	startsnp=ARS-BFGL-NGS-97847	endsnp=BovineHD1100030711
chr11:106196578-106449563	numsnp=75	length=252,986	state2,cn=1	11	startsnp=BovineHD1100030807	endsnp=BovineHD4100009288
chr11:106588843-106716196	numsnp=62	length=127,354	state2,cn=1	11	startsnp=BovineHD1100030960	endsnp=BovineHD1100031016
chr12:25982695-26405287	numsnp=85	length=422,593	state2,cn=1	11	startsnp=BovineHD1200026838	endsnp=BovineHD1200007910
chr12:72518489-72579020	numsnp=21	length=60,532	state2,cn=1	11	startsnp=BovineHD1200020006	endsnp=BovineHD1200020032
chr12:90602848-90725625	numsnp=31	length=122,778	state2,cn=1	11	startsnp=BovineHD1200026560	endsnp=BovineHD1200026586
chr13:20965563-21042957	numsnp=39	length=77,395	state2,cn=1	11	startsnp=BovineHD1300006064	endsnp=BovineHD1300024548
chr14:2790501-2898515	numsnp=17	length=108,015	state2,cn=1	11	startsnp=BovineHD4100010557	endsnp=BovineHD1400000467
chr14:44047994-44134488	numsnp=29	length=86,495	state2,cn=1	11	startsnp=BovineHD1400012467	endsnp=BovineHD1400012493
chr14:66942233-67489095	numsnp=128	length=546,863	state2,cn=1	11	startsnp=BovineHD1400018721	endsnp=BovineHD1400018846
chr14:83547949-83615008	numsnp=33	length=67,060	state2,cn=1	11	startsnp=BovineHD1400023602	endsnp=BovineHD1400023633
chr15:43243589-43308530	numsnp=17	length=64,942	state2,cn=1	11	startsnp=BovineHD1500012025	endsnp=Hapmap46538-BTA-88332
chr15:47873132-48068620	numsnp=32	length=195,489	state2,cn=1	11	startsnp=BovineHD1500013731	endsnp=Hapmap55024-rs29015792
chr15:50409037-50486846	numsnp=15	length=77,810	state2,cn=1	11	startsnp=BovineHD1500014536	endsnp=BovineHD1500014556
chr15:79912401-79994463	numsnp=30	length=82,063	state2,cn=1	11	startsnp=BovineHD1500023306	endsnp=BovineHD1500023338
chr15:85099027-85224354	numsnp=38	length=125,328	state2,cn=1	11	startsnp=BovineHD1500026068	endsnp=BovineHD1500024984
chr16:9865545-10095867	numsnp=61	length=230,323	state2,cn=1	11	startsnp=BovineHD1600002658	endsnp=BovineHD1600002720
chr16:27055885-27154383	numsnp=33	length=98,499	state2,cn=1	11	startsnp=BovineHD1600007484	endsnp=BovineHD1600007515
chr16:38371856-38530062	numsnp=33	length=158,207	state2,cn=1	11	startsnp=BovineHD1600011020	endsnp=BovineHD1600011049
chr16:70817117-70924028	numsnp=23	length=106,912	state2,cn=1	11	startsnp=BovineHD1600020127	endsnp=BovineHD1600020149
chr16:71083442-71180683	numsnp=26	length=97,242	state2,cn=1	11	startsnp=BovineHD1600020182	endsnp=BovineHD1600020209
chr17:36056925-36133388	numsnp=12	length=76,464	state2,cn=1	11	startsnp=BovineHD1700009844	endsnp=BovineHD1700009856
chr17:71841734-71900819	numsnp=27	length=59,086	state2,cn=1	11	startsnp=ARS-BFGL-NGS-5369	endsnp=BovineHD1700020948
chr17:73354100-73519733	numsnp=50	length=165,634	state2,cn=1	11	startsnp=BovineHD1700021435	endsnp=BovineHD1700021478
chr17:73565104-73858134	numsnp=97	length=293,031	state2,cn=1	11	startsnp=BovineHD1700021491	endsnp=BovineHD1700021585
chr17:74836297-75148791	numsnp=58	length=312,495	state2,cn=1	11	startsnp=BovineHD1700021850	endsnp=BovineHD1700022147
chr18:21665648-21805397	numsnp=30	length=139,750	state2,cn=1	11	startsnp=BovineHD1800006681	endsnp=BovineHD1800006706
chr18:38789436-38893878	numsnp=15	length=104,443	state2,cn=1	11	startsnp=BovineHD1800011523	endsnp=BovineHD1800011534
chr20:45030237-45106413	numsnp=12	length=76,177	state2,cn=1	11	startsnp=BovineHD2000012773	endsnp=Hapmap61037-rs29016327
chr20:70891780-71331199	numsnp=115	length=439,420	state2,cn=1	11	startsnp=BovineHD2000020749	endsnp=BovineHD2000020860
chr21:70221263-70449176	numsnp=85	length=227,914	state2,cn=1	11	startsnp=BovineHD2100020518	endsnp=BovineHD2100020597
chr21:70701216-70896927	numsnp=58	length=195,712	state2,cn=1	11	startsnp=BovineHD2100020703	endsnp=BovineHD2100020748
chr22:59964685-60220816	numsnp=82	length=256,132	state2,cn=1	11	startsnp=BovineHD2200017401	endsnp=BovineHD2200017476
chr22:60459451-61199665	numsnp=246	length=740,215	state2,cn=1	11	startsnp=ARS-BFGL-NGS-41433	endsnp=ARS-BFGL-NGS-105794
chr23:29217826-29283590	numsnp=25	length=65,765	state2,cn=1	11	startsnp=BovineHD2300008307	endsnp=BovineHD2300008334
chr23:51919582-51977468	numsnp=15	length=57,887	state2,cn=1	11	startsnp=BovineHD2300015087	endsnp=BovineHD2300015099
chr25:279528-668542	numsnp=101	length=389,015	state2,cn=1	11	startsnp=ARS-BFGL-NGS-109911	endsnp=BovineHD4100016796
chr25:768930-1004903	numsnp=45	length=235,974	state2,cn=1	11	startsnp=BovineHD2500000182	endsnp=BovineHD2500000219
chr25:1040952-1214553	numsnp=68	length=173,602	state2,cn=1	11	startsnp=BovineHD2500000227	endsnp=BovineHD2500000273
[truncated: 25,202 more rows]
